# Supplementary material for: Hepatitis C Virus Induced miR200c Down Modulates FAP-1, a Negative Regulator of Src Signaling and Promotes Hepatic Fibrosis
Source: PubMed Central journal article supplement (PMC3741284; doi:10.1371/journal.pone.0070744), 2013-08-12
Supplement: pone.0070744.s001.pdf [file pone.0070744.s001.pdf]

| Probe ID     | SYMBOL  | CHROMOSOME | DEFINITION                                                                                                                         | SYNONYMS                | p-value(HCV vs. Normal) | FoldChange(HCV vs. Normal) |
|--------------|---------|------------|------------------------------------------------------------------------------------------------------------------------------------|-------------------------|-------------------------|----------------------------|
| ILMN_1751607 | FDFT1   | 8          | Homo sapiens farnesyl-diphosphate farnesyltransferase 1 (FDFT1), mRNA.                                                             | SS; DGPT; SQS; ERG9     | 0.00850675              | 27.0379                    |
| ILMN_1664464 | DNAJC3  | 13         | Homo sapiens DnaJ (Hsp40) homolog, subfamily C, member 3 (DNAJC3), mRNA.                                                           | PRKRI; HP58; P58IPK; P5 | 0.0445901               | 24.4452                    |
| ILMN_1680274 | MT1H    | 16         | Homo sapiens metallothionein 1H (MT1H), mRNA.                                                                                      | MGC70702; MT1           | 0.0435413               | 22.5672                    |
| ILMN_1699214 | FAM96A  | 15         | Homo sapiens family with sequence similarity 96, member A (FAM96A), transcript variant 2, mRNA.                                    | FLJ22875                | 0.0330944               | 18.8945                    |
| ILMN_1790529 | SNCA    | 4          | Homo sapiens synuclein, alpha (non A4 component of amyloid precursor) (SNCA), transcript variant NACP112, mRNA.                    | PD1; NACP; PARK4; MGC   | 0.0302102               | 17.8078                    |
| ILMN_1739508 | IHPK3   | 6          | Homo sapiens inositol hexaphosphate kinase 3 (IHPK3), mRNA.                                                                        | IP6K3; MGC102928; INSI  | 0.0294882               | 17.5373                    |
| ILMN_1720048 | LHFP    | 13         | Homo sapiens lipoma HMGIC fusion partner (LHFP), mRNA.                                                                             |                         | 0.0174947               | 17.1514                    |
| ILMN_1804601 | PCTP    | 17         | Homo sapiens phosphatidylcholine transfer protein (PCTP), mRNA.                                                                    | STARD2                  | 0.0476138               | 16.537                     |
| ILMN_2350634 | PTGDR   | 14         | Homo sapiens prostaglandin D2 receptor (DP) (PTGDR), mRNA.                                                                         | MGC49004; ASRT1; DP; A  | 0.0167806               | 16.1553                    |
| ILMN_1678842 | SLC35D1 | 1          | Homo sapiens solute carrier family 35 (UDP-glucuronic acid/UDP-N-acetylgalactosamine dual transporter), member D1 (SLC35D1), mRNA. | KIAA0260; MGC138236;    | 0.000906238             | 14.4414                    |

|              |         |    |                                                                                                                  |                        |             |         |
|--------------|---------|----|------------------------------------------------------------------------------------------------------------------|------------------------|-------------|---------|
| ILMN_1687501 | FILIP1L | 3  | Homo sapiens filamin A interacting protein 1-like (FILIP1L), transcript variant 2, mRNA.                         | DOC-1; GIP90; DOC1     | 0.0124355   | 13.5582 |
| ILMN_1658494 | ACN9    | 7  | Homo sapiens ACN9 homolog (S. cerevisiae) (ACN9), mRNA.                                                          | DC11                   | 0.00795725  | 13.1636 |
| ILMN_1651958 | CSAG3A  | X  | Homo sapiens CSAG family, member 3A (CSAG3A), mRNA.                                                              | MGC17065               | 0.00230244  | 11.8389 |
| ILMN_2071809 | MATK    | 19 | Homo sapiens megakaryocyte-associated tyrosine kinase (MATK), transcript variant 3, mRNA.                        | DKFZp434N1212; HHYLT   | 0.000258862 | 11.8375 |
| ILMN_1653579 | HAO2    | 1  | Homo sapiens hydroxyacid oxidase 2 (long chain) (HAO2), transcript variant 2, mRNA.                              | HAOX2; GIG16           | 0.0350986   | 11.167  |
| ILMN_1772964 | ATN1    | 12 | Homo sapiens atrophin 1 (ATN1), transcript variant 1, mRNA.                                                      | DRPLA; NOD; B37; D12S  | 0.0150017   | 10.7226 |
| ILMN_1779875 | CA1     | 8  | Homo sapiens carbonic anhydrase I (CA1), mRNA.                                                                   | Car1                   | 0.034077    | 10.5553 |
| ILMN_2098126 | GPNMB   | 7  | Homo sapiens glycoprotein (transmembrane) nmb (GPNMB), transcript variant 1, mRNA.                               | NMB; HGFIN             | 0.0439817   | 10.5233 |
| ILMN_1743199 | ST8SIA4 | 5  | Homo sapiens ST8 alpha-N-acetyl-neuraminide alpha-2,8-sialyltransferase 4 (ST8SIA4), transcript variant 1, mRNA. | PST1; MGC61459; SIAT8  | 0.00200071  | 10.402  |
| ILMN_1752755 | DCN     | 12 | Homo sapiens decorin (DCN), transcript variant C, mRNA.                                                          | PGII; DSPG2; CSCD; PGS | 0.00529227  | 10.1759 |
| ILMN_1706505 | DNAJC12 | 10 | Homo sapiens DnaJ (Hsp40) homolog, subfamily C, member 12 (DNAJC12), transcript variant 2, mRNA.                 | RP11-57G10.2; JDP1     | 0.00623458  | 9.85081 |
| ILMN_2054297 |         |    | AGENCOURT_10520654<br>NIH_MGC_128 Homo sapiens cDNA clone IMAGE:6702588 5, mRNA sequence                         |                        | 0.0202577   | 9.80606 |

|              |           |    |                                                                                                |                        |             |         |
|--------------|-----------|----|------------------------------------------------------------------------------------------------|------------------------|-------------|---------|
| ILMN_2104356 | LOC613037 | 16 | Homo sapiens nuclear pore complex interacting protein pseudogene (LOC613037) on chromosome 16. |                        | 0.010573    | 9.40124 |
| ILMN_1679262 | CLEC1B    | 12 | Homo sapiens C-type lectin domain family 1, member B (CLEC1B), transcript variant 1, mRNA.     | 1810061I13Rik; CLEC2B; | 0.00101639  | 9.09621 |
| ILMN_1790689 | THY1      | 11 | Homo sapiens Thy-1 cell surface antigen (THY1), mRNA.                                          | CD90; FLJ33325         | 0.0255171   | 8.60203 |
| ILMN_2179083 | MYO1G     | 7  | Homo sapiens myosin IG (MYO1G), mRNA.                                                          | HA-2; MGC142104        | 0.000408193 | 8.22701 |
| ILMN_1772910 | TMSB10    | 2  | Homo sapiens thymosin beta 10 (TMSB10), mRNA.                                                  | MIG12; TB10            | 0.00766838  | 8.16496 |
| ILMN_1785272 | ACACA     | 17 | Homo sapiens acetyl-Coenzyme A carboxylase alpha (ACACA), transcript variant 2, mRNA.          | ACC1; ACAC; ACCA; ACC  | 0.00539356  | 8.16197 |
| ILMN_1653466 | KCTD14    | 11 | Homo sapiens potassium channel tetramerisation domain containing 14 (KCTD14), mRNA.            | MGC2376                | 0.0147468   | 8.15493 |
| ILMN_1762899 | SYK       | 9  | Homo sapiens spleen tyrosine kinase (SYK), mRNA.                                               |                        | 0.0012691   | 8.01957 |
| ILMN_1656920 | AQP12A    | 2  | Homo sapiens aquaporin 12A (AQP12A), mRNA.                                                     | AQPX2; AQP12           | 0.000819727 | 7.8523  |
| ILMN_1810289 | CCND2     | 12 | Homo sapiens cyclin D2 (CCND2), mRNA.                                                          | KIAK0002; MGC102758    | 0.000631499 | 7.69727 |
| ILMN_2328666 | FKSG24    | 19 | Homo sapiens hypothetical protein MGC12972 (FKSG24), mRNA.                                     | MGC110861; MGC12972    | 0.0219381   | 7.68178 |
| ILMN_1671703 | KLB       | 4  | Homo sapiens klotho beta (KLB), mRNA.                                                          | BKL; MGC142213         | 0.00117047  | 7.67315 |
| ILMN_1723035 | TMEM56    | 1  | Homo sapiens transmembrane protein 56 (TMEM56), mRNA.                                          | MGC102912; FLJ31842    | 0.0111053   | 7.61496 |
| ILMN_1672536 | NRG4      | 15 | Homo sapiens neuregulin 4 (NRG4), mRNA.                                                        | HRG4; DKFZp779N0541;   | 0.00951408  | 7.56529 |

|              |          |    |                                                                                                                      |                         |            |         |
|--------------|----------|----|----------------------------------------------------------------------------------------------------------------------|-------------------------|------------|---------|
| ILMN_2127842 | IGLL1    | 22 | Homo sapiens immunoglobulin lambda-like polypeptide 1 (IGLL1), transcript variant 1, mRNA.                           | IGO; IGVPB; IGLL; CD179 | 0.0291169  | 7.53433 |
| ILMN_2230025 | DEFA3    | 8  | Homo sapiens defensin, alpha 3, neutrophil-specific (DEFA3), mRNA.                                                   | HNP3; HNP-3; DEF3; HP-  | 2.65E-05   | 7.45335 |
| ILMN_1673566 |          |    | Homo sapiens, clone IMAGE:5528576, mRNA                                                                              |                         | 0.0209274  | 7.44703 |
| ILMN_1667796 | BRCA1    | 17 | Homo sapiens breast cancer 1, early onset (BRCA1), transcript variant BRCA1-delta14-17, mRNA.                        | RNF53; BRCA1; PSCP; BR  | 0.0221319  | 7.44411 |
| ILMN_1736178 | C5orf29  | 5  | Homo sapiens chromosome 5 open reading frame 29 (C5orf29), mRNA.                                                     | MGC70478; FLJ33641      | 0.00510722 | 7.39146 |
| ILMN_1734653 | TLR7     | X  | Homo sapiens toll-like receptor 7 (TLR7), mRNA.                                                                      |                         | 0.0194564  | 7.2746  |
| ILMN_1653028 | FGA      | 4  | Homo sapiens fibrinogen alpha chain (FGA), transcript variant alpha-E, mRNA.                                         | MGC119425; MGC119423    | 0.0019621  | 7.14518 |
| ILMN_1789196 | TNFRSF6B | 20 | Homo sapiens tumor necrosis factor receptor superfamily, member 6b, decoy (TNFRSF6B), transcript variant M68C, mRNA. | DJ583P15.1.1; M68; TR6  | 0.00285444 | 7.13857 |
| ILMN_1778668 | KGFLP1   | 9  | Homo sapiens keratinocyte growth factor-like protein 1 (KGFLP1) on chromosome 9.                                     | MGC125747; MGC126891    | 0.00820784 | 7.13203 |
| ILMN_1655595 | HAO2     | 1  | Homo sapiens hydroxyacid oxidase 2 (long chain) (HAO2), transcript variant 1, mRNA.                                  | GIG16; HAOX2            | 0.0102935  | 7.13158 |
| ILMN_2400935 | FLJ45139 | 21 | Homo sapiens FLJ45139 protein (FLJ45139), mRNA.                                                                      |                         | 0.0113534  | 7.10884 |
| ILMN_2393765 | PIGP     | 21 | Homo sapiens phosphatidylinositol glycan anchor biosynthesis, class P (PIGP), transcript variant 2, mRNA.            | DCRC-S; DSCR5; DCRC;    | 0.0190876  | 7.10592 |

|              |          |    |                                                                                                                                                  |                          |             |         |
|--------------|----------|----|--------------------------------------------------------------------------------------------------------------------------------------------------|--------------------------|-------------|---------|
| ILMN_1780582 | DBNDD2   | 20 | Homo sapiens dysbindin (dystrobrevin binding protein 1) domain containing 2 (DBNDD2), transcript variant 3, mRNA.                                | HSMNP1; CK1BP; C20orf3   | 0.0241655   | 6.88431 |
| ILMN_1688642 | FKBP5    | 6  | Homo sapiens FK506 binding protein 5 (FKBP5), mRNA.                                                                                              | FKBP54; P54; PPIase; Ptg | 0.0178307   | 6.84879 |
| ILMN_1775501 | ALDH4A1  | 1  | Homo sapiens aldehyde dehydrogenase 4 family, member A1 (ALDH4A1), nuclear gene encoding mitochondrial protein, transcript variant P5CDhL, mRNA. | P5CDh; P5CD; ALDH4; P5   | 0.00581907  | 6.74479 |
| ILMN_1689146 | COL4A1   | 13 | Homo sapiens collagen, type IV, alpha 1 (COL4A1), mRNA.                                                                                          | arresten                 | 0.019105    | 6.53057 |
| ILMN_1726589 | B3GALNT1 | 3  | Homo sapiens beta-1,3-N-acetylgalactosaminyltransferase 1 (globoside blood group) (B3GALNT1), transcript variant 3, mRNA.                        | galT3; P1; B3GALT3; GLC  | 0.00111089  | 6.49869 |
| ILMN_1735877 | NDE1     | 16 | Homo sapiens nude nuclear distribution gene E homolog 1 (A. nidulans) (NDE1), mRNA.                                                              | FLJ20101; HOM-TES-87;    | 0.0099916   | 6.38602 |
| ILMN_1670379 | CMTM3    | 16 | Homo sapiens CKLF-like MARVEL transmembrane domain containing 3 (CMTM3), transcript variant 5, mRNA.                                             | BNAS2; MGC51956; CKLF    | 0.000473306 | 6.36486 |
| ILMN_2067656 | AFMID    | 17 | Homo sapiens arylformamidase (AFMID), mRNA.                                                                                                      | KF; DKFZp686F03259       | 0.00123571  | 6.34492 |
| ILMN_1761788 | GPR56    | 16 | Homo sapiens G protein-coupled receptor 56 (GPR56), transcript variant 2, mRNA.                                                                  | BFPP; DKFZp781L1398; T   | 0.0193817   | 6.31374 |
| ILMN_2184184 | FLJ21438 | 19 | Homo sapiens hypothetical protein FLJ21438 (FLJ21438), mRNA.                                                                                     | DKFZp667E013; FLJ0008    | 0.00175813  | 6.29803 |

|              |          |    |                                                                                                                                            |                        |             |         |
|--------------|----------|----|--------------------------------------------------------------------------------------------------------------------------------------------|------------------------|-------------|---------|
| ILMN_1656057 | SLC31A2  | 9  | Homo sapiens solute carrier family 31 (copper transporters), member 2 (SLC31A2), mRNA.                                                     | hCTR2; CTR2; COPT2     | 0.00266231  | 6.21525 |
| ILMN_1772612 | SLCO3A1  | 15 | Homo sapiens solute carrier organic anion transporter family, member 3A1 (SLCO3A1), mRNA.                                                  | FLJ40478; SLC21A11; OA | 0.00067693  | 6.14936 |
| ILMN_1676449 | RFX5     | 1  | Homo sapiens regulatory factor X, 5 (influences HLA class II expression) (RFX5), transcript variant 2, mRNA.                               |                        | 0.00188831  | 6.13656 |
| ILMN_1768940 | YWHAZ    | 8  | Homo sapiens tyrosine 3-monooxygenase/tryptophan 5-monooxygenase activation protein, zeta polypeptide (YWHAZ), transcript variant 1, mRNA. | KCIP-1; MGC126532; MG  | 0.023983    | 5.92257 |
| ILMN_1782538 | F3       | 1  | Homo sapiens coagulation factor III (thromboplastin, tissue factor) (F3), mRNA.                                                            | TF; TFA; CD142         | 0.00316895  | 5.87898 |
| ILMN_1654324 |          |    | AGENCOURT_T0404673 NIH_MGC_82 Homo sapiens cDNA clone IMAGE:6615135 5, mRNA sequence                                                       |                        | 0.0043923   | 5.84416 |
| ILMN_1738742 | DMRTA1   | 9  | Homo sapiens DMRT-like family A1 (DMRTA1), mRNA.                                                                                           | MGC163307; DMO; MGC1   | 0.00739488  | 5.81201 |
| ILMN_2352131 | LPA      | 6  | Homo sapiens lipoprotein, Lp(a) (LPA), mRNA.                                                                                               | LP; APOA; AK38         | 1.53E-05    | 5.79939 |
| ILMN_1741688 | C13orf15 | 13 | Homo sapiens chromosome 13 open reading frame 15 (C13orf15), mRNA.                                                                         | RGC-32; KIAA0564; bA15 | 0.000324392 | 5.76927 |
| ILMN_1773079 | MS4A3    | 11 | Homo sapiens membrane-spanning 4-domains, subfamily A, member 3 (hematopoietic cell-specific) (MS4A3), transcript variant 1, mRNA.         | CD20L; HTM4            | 0.00166452  | 5.73205 |

|              |         |    |                                                                                                   |                        |            |         |
|--------------|---------|----|---------------------------------------------------------------------------------------------------|------------------------|------------|---------|
| ILMN_1741356 | MARCKS  | 6  | Homo sapiens myristoylated alanine-rich protein kinase C substrate (MARCKS), mRNA.                | MACS; 80K-L; PRKCSL; F | 0.00529303 | 5.67998 |
| ILMN_1723684 | BEXL1   |    | PREDICTED: Homo sapiens brain expressed X-linked-like 1 (BEXL1), mRNA.                            |                        | 0.00131132 | 5.63846 |
| ILMN_2143795 | IL15    | 4  | Homo sapiens interleukin 15 (IL15), transcript variant 3, mRNA.                                   | MGC9721; IL-15         | 0.033597   | 5.60579 |
| ILMN_1806667 | SUSD3   | 9  | Homo sapiens sushi domain containing 3 (SUSD3), mRNA.                                             | MGC26847               | 0.0365778  | 5.53998 |
| ILMN_1700541 | FAM129B | 9  | Homo sapiens family with sequence similarity 129, member B (FAM129B), transcript variant 1, mRNA. | OC58; MEG-3; FLJ13518; | 0.00294163 | 5.52412 |
| ILMN_1790555 | COL6A2  | 21 | Homo sapiens collagen, type VI, alpha 2 (COL6A2), transcript variant 2C2, mRNA.                   | PP3610; DKFZp586E1322  | 0.0123958  | 5.51744 |
| ILMN_1662358 | STEAP1  | 7  | Homo sapiens six transmembrane epithelial antigen of the prostate 1 (STEAP1), mRNA.               | MGC19484; PRSS24; STE  | 0.0476296  | 5.49019 |
| ILMN_1773006 | ARHGEF2 | 1  | Homo sapiens rho/rac guanine nucleotide exchange factor (GEF) 2 (ARHGEF2), mRNA.                  | P40; GEF; LFP40; DKFZp | 0.00575156 | 5.45486 |
| ILMN_1746565 | MOGAT2  | 11 | Homo sapiens monoacylglycerol O-acyltransferase 2 (MOGAT2), mRNA.                                 | DGAT2L5; MGC119183; F  | 0.0328181  | 5.43587 |
| ILMN_1805737 | COL1A2  | 7  | Homo sapiens collagen, type I, alpha 2 (COL1A2), mRNA.                                            | OI4                    | 0.0189567  | 5.41274 |
| ILMN_1800739 | FAM43A  | 3  | Homo sapiens family with sequence similarity 43, member A (FAM43A), mRNA.                         | FLJ90022               | 0.0476368  | 5.39152 |
| ILMN_1660462 | NOS1AP  | 1  | Homo sapiens nitric oxide synthase 1 (neuronal) adaptor protein (NOS1AP), mRNA.                   | MGC138500; CAPON       | 0.0351977  | 5.37559 |

|              |           |    |                                                                                                                |                         |            |         |
|--------------|-----------|----|----------------------------------------------------------------------------------------------------------------|-------------------------|------------|---------|
| ILMN_2246956 | TNFSF10   | 3  | Homo sapiens tumor necrosis factor (ligand) superfamily, member 10 (TNFSF10), mRNA.                            | TL2; Apo-2L; CD253; APC | 0.00810669 | 5.3402  |
| ILMN_1782305 |           |    | PREDICTED: Homo sapiens hypothetical LOC401062 (LOC401062), mRNA                                               |                         | 0.0122334  | 5.27908 |
| ILMN_2112638 | RELN      | 7  | Homo sapiens reelin (RELN), transcript variant 1, mRNA.                                                        | RL                      | 0.0162312  | 5.27509 |
| ILMN_1815673 | GSN       | 9  | Homo sapiens gelsolin (amyloidosis, Finnish type) (GSN), transcript variant 2, mRNA.                           | DKFZp313L0718           | 0.00436993 | 5.24269 |
| ILMN_1757604 | AGXT2     | 5  | Homo sapiens alanine-glyoxylate aminotransferase 2 (AGXT2), nuclear gene encoding mitochondrial protein, mRNA. | AGT2                    | 0.00618568 | 5.21584 |
| ILMN_2374865 | HBA2      | 16 | Homo sapiens hemoglobin, alpha 2 (HBA2), mRNA.                                                                 | HBA1                    | 0.0346004  | 5.16617 |
| ILMN_1686573 | NLF2      |    | PREDICTED: Homo sapiens nuclear localized factor 2 (NLF2), mRNA.                                               |                         | 0.0277116  | 5.11733 |
| ILMN_2329914 | LOC23117  | 16 | PREDICTED: Homo sapiens KIAA0220-like protein, transcript variant 16 (LOC23117), mRNA.                         |                         | 0.00813694 | 5.11594 |
| ILMN_2316236 | ISG20     | 15 | Homo sapiens interferon stimulated exonuclease gene 20kDa (ISG20), mRNA.                                       | CD25; HEM45             | 0.0120227  | 5.11335 |
| ILMN_1756439 | CLEC4G    | 19 | Homo sapiens C-type lectin superfamily 4, member G (CLEC4G), mRNA.                                             | LSEctin; LP2698; UNQ43  | 0.024647   | 5.08755 |
| ILMN_2398159 | LOC153561 | 5  | Homo sapiens hypothetical protein LOC153561 (LOC153561), mRNA.                                                 |                         | 0.00933763 | 5.08398 |



|              |         |    |                                                                                                                                                  |                         |             |         |
|--------------|---------|----|--------------------------------------------------------------------------------------------------------------------------------------------------|-------------------------|-------------|---------|
| ILMN_1716246 | ALDH4A1 | 1  | Homo sapiens aldehyde dehydrogenase 4 family, member A1 (ALDH4A1), nuclear gene encoding mitochondrial protein, transcript variant P5CDhS, mRNA. | P5CDh; P5CD; ALDH4; P5  | 0.00316614  | 5.04882 |
| ILMN_1659075 | MANEA   | 6  | Homo sapiens mannosidase, endo-alpha (MANEA), mRNA.                                                                                              | FLJ12838; hEndo; DKFZp  | 0.0116576   | 5.02835 |
| ILMN_1691860 | ISLR    | 15 | Homo sapiens immunoglobulin superfamily containing leucine-rich repeat (ISLR), transcript variant 1, mRNA.                                       | HsT17563; MGC102816     | 0.00726262  | 5.02663 |
| ILMN_1656501 | SLC44A1 | 9  | Homo sapiens solute carrier family 44, member 1 (SLC44A1), mRNA.                                                                                 | RP11-287A8.1; CHTL1; C  | 0.0110374   | 5.00315 |
| ILMN_1687384 | IDH2    | 15 | Homo sapiens isocitrate dehydrogenase 2 (NADP+), mitochondrial (IDH2), nuclear gene encoding mitochondrial protein, mRNA.                        | ICD-M; IDHM; IDH; IDP;  | 0.0328017   | 4.99946 |
| ILMN_1738116 | FBLN2   | 3  | Homo sapiens fibulin 2 (FBLN2), transcript variant 2, mRNA.                                                                                      |                         | 0.00363588  | 4.97081 |
| ILMN_2058251 |         |    | K-EST0224780 L17N670205n1<br>Homo sapiens cDNA clone L17N670205n1-28-B04 5, mRNA sequence                                                        |                         | 0.000670946 | 4.94067 |
| ILMN_1706643 | KBTBD9  | 2  | PREDICTED: Homo sapiens kelch repeat and BTB (POZ) domain containing 9 (KBTBD9), mRNA.                                                           |                         | 0.00385789  | 4.86792 |
| ILMN_1734276 | NCOA7   | 6  | Homo sapiens nuclear receptor coactivator 7 (NCOA7), mRNA.                                                                                       | FLJ45605; dJ187J11.3; E | 0.0325988   | 4.86491 |
| ILMN_1736567 | MAB21L2 |    | PREDICTED: Homo sapiens mab-21-like 2 (C. elegans) (MAB21L2), mRNA.                                                                              |                         | 0.00681675  | 4.84719 |

|              |          |    |                                                                                                                              |                        |            |         |
|--------------|----------|----|------------------------------------------------------------------------------------------------------------------------------|------------------------|------------|---------|
| ILMN_2170814 | IFI16    | 1  | Homo sapiens interferon, gamma-inducible protein 16 (IFI16), mRNA.                                                           | IFNGIP1; PYHIN2        | 0.019963   | 4.83154 |
| ILMN_1738578 | ARHGAP4  | X  | Homo sapiens Rho GTPase activating protein 4 (ARHGAP4), mRNA.                                                                | p115; C1; RGC1; KIAA01 | 0.00755451 | 4.82694 |
| ILMN_1815057 | GPD1     | 12 | Homo sapiens glycerol-3-phosphate dehydrogenase 1 (soluble) (GPD1), mRNA.                                                    | FLJ26652               | 0.0017036  | 4.82055 |
| ILMN_2062468 | STAT4    | 2  | Homo sapiens signal transducer and activator of transcription 4 (STAT4), mRNA.                                               |                        | 0.0114465  | 4.70951 |
| ILMN_1815500 | MME      | 3  | Homo sapiens membrane metallo-endopeptidase (MME), transcript variant 1, mRNA.                                               | MGC126681; NEP; CD10;  | 0.0130727  | 4.70651 |
| ILMN_1755383 | SPIRE1   | 18 | Homo sapiens spire homolog 1 (Drosophila) (SPIRE1), mRNA.                                                                    | Spir-1; MGC150622; MGC | 0.00213588 | 4.70613 |
| ILMN_1797822 | DDEF1    | 8  | Homo sapiens development and differentiation enhancing factor 1 (DDEF1), mRNA.                                               | ZG14P; AMAP1; PAG2; AS | 0.00564541 | 4.66707 |
| ILMN_1789733 | FDFT1    | 8  | Homo sapiens farnesyl-diphosphate farnesyltransferase 1 (FDFT1), mRNA.                                                       | SS; DGPT; SQS; ERG9    | 0.00726868 | 4.64913 |
| ILMN_1691376 | IFT57    | 3  | Homo sapiens intraflagellar transport 57 homolog (Chlamydomonas) (IFT57), mRNA.                                              | ESRRBL1; MHS4R2; FLJ1  | 0.00722885 | 4.62884 |
| ILMN_1791890 | FBLN1    | 22 | Homo sapiens fibulin 1 (FBLN1), transcript variant D, mRNA.                                                                  | FBLN                   | 0.0185486  | 4.62155 |
| ILMN_1758895 | SERPINE2 | 2  | Homo sapiens serpin peptidase inhibitor, clade E (nexin, plasminogen activator inhibitor type 1), member 2 (SERPINE2), mRNA. | PI7; GDN; PNI; PN1     | 0.00116083 | 4.58947 |
| ILMN_2413158 | MCOLN2   | 1  | Homo sapiens mucolipin 2 (MCOLN2), mRNA.                                                                                     | TRP-ML2; TRPML2; FLJ36 | 0.00179989 | 4.57795 |

|              |          |    |                                                                                                |                         |            |         |
|--------------|----------|----|------------------------------------------------------------------------------------------------|-------------------------|------------|---------|
| ILMN_1711015 | DNASE1L3 | 3  | Homo sapiens deoxyribonuclease I-like 3 (DNASE1L3), mRNA.                                      | LSD; DNASE1L3; DHP2     | 0.0319023  | 4.5756  |
| ILMN_1674063 | SHMT1    | 17 | Homo sapiens serine hydroxymethyltransferase 1 (soluble) (SHMT1), transcript variant 1, mRNA.  | MGC15229; MGC24556; S   | 0.0400634  | 4.56232 |
| ILMN_1766499 | PDGFD    | 11 | Homo sapiens platelet derived growth factor D (PDGFD), transcript variant 1, mRNA.             | MSTP036; IEGF; MGC268   | 0.00942    | 4.53746 |
| ILMN_1671295 | FOXA1    | 14 | Homo sapiens forkhead box A1 (FOXA1), mRNA.                                                    | MGC33105; TCF3A; HNF3   | 0.0314431  | 4.5072  |
| ILMN_1772218 | CCL3     | 17 | Homo sapiens chemokine (C-C motif) ligand 3 (CCL3), mRNA.                                      | SCYA3; MIP-1-alpha; GOS | 0.0156619  | 4.49619 |
| ILMN_1776181 | TGIF1    | 18 | Homo sapiens TGF-beta-induced factor homeobox 1 (TGIF1), transcript variant 1, mRNA.           | HPE4; MGC5066; MGC39    | 0.00822225 | 4.49515 |
| ILMN_1747593 | C6       | 5  | Homo sapiens complement component 6 (C6), mRNA.                                                |                         | 0.00122675 | 4.48961 |
| ILMN_1713636 | GLT8D2   | 12 | Homo sapiens glycosyltransferase 8 domain containing 2 (GLT8D2), mRNA.                         | FLJ31494                | 0.0384111  | 4.4651  |
| ILMN_1658356 | ST3GAL6  | 3  | Homo sapiens ST3 beta-galactoside alpha-2,3-sialyltransferase 6 (ST3GAL6), mRNA.               | ST3GALVI; SIAT10        | 0.00548795 | 4.42856 |
| ILMN_1687301 | EVC2     | 4  | Homo sapiens Ellis van Creveld syndrome 2 (limbin) (EVC2), mRNA.                               | LBN                     | 0.0162229  | 4.41056 |
| ILMN_2379644 | ALDH8A1  | 6  | Homo sapiens aldehyde dehydrogenase 8 family, member A1 (ALDH8A1), transcript variant 1, mRNA. | DKFZp779D2315; MGC13    | 0.0166786  | 4.38994 |
| ILMN_1758128 | ILK      | 11 | Homo sapiens integrin-linked kinase (ILK), transcript variant 1, mRNA.                         | P59; DKFZp686F1765      | 0.00198617 | 4.38539 |

|              |           |    |                                                                                                                                              |                        |             |         |
|--------------|-----------|----|----------------------------------------------------------------------------------------------------------------------------------------------|------------------------|-------------|---------|
| ILMN_1689655 | LOC728037 | 16 | PREDICTED: Homo sapiens similar to Kinesin-like protein KIF22 (Kinesin-like DNA-binding protein) (Kinesin-like protein 4) (LOC728037), mRNA. |                        | 0.0105017   | 4.38379 |
| ILMN_1771688 | LAYN      | 11 | Homo sapiens layilin (LAYN), mRNA.                                                                                                           | FLJ30977; FLJ31092     | 0.000531632 | 4.3812  |
| ILMN_1735014 | NSDHL     | X  | Homo sapiens NAD(P) dependent steroid dehydrogenase-like (NSDHL), mRNA.                                                                      | H105E3; XAP104         | 0.0070912   | 4.35773 |
| ILMN_2309156 | CHN2      | 7  | Homo sapiens chimerin (chimaerin) 2 (CHN2), transcript variant 2, mRNA.                                                                      | BCH; ARHGAP3; RHOGAP   | 0.0309475   | 4.35064 |
| ILMN_1799467 | PDPN      | 1  | Homo sapiens podoplanin (PDPN), transcript variant 4, mRNA.                                                                                  | Gp38; OTS8; T1A; PA2.2 | 0.00804747  | 4.31624 |
| ILMN_1665526 | C20orf103 | 20 | Homo sapiens chromosome 20 open reading frame 103 (C20orf103), mRNA.                                                                         |                        | 0.0298176   | 4.26244 |
| ILMN_2390919 | TMEM178   | 2  | Homo sapiens transmembrane protein 178 (TMEM178), mRNA.                                                                                      | MGC33926               | 0.0180019   | 4.25635 |
| ILMN_2087692 | TRAF5     | 1  | Homo sapiens TNF receptor-associated factor 5 (TRAF5), transcript variant 1, mRNA.                                                           | MGC:39780; RNF84       | 0.0358556   | 4.25339 |
| ILMN_1695311 | ADK       | 10 | Homo sapiens adenosine kinase (ADK), transcript variant ADK-short, mRNA.                                                                     | AK                     | 0.0107724   | 4.21186 |
| ILMN_2339955 | SDCBP2    | 20 | Homo sapiens syndecan binding protein (syntenin) 2 (SDCBP2), transcript variant 2, mRNA.                                                     | SITAC18; ST-2          | 0.0304891   | 4.19872 |
| ILMN_1749070 | MYH9      | 22 | Homo sapiens myosin, heavy chain 9, non-muscle (MYH9), mRNA.                                                                                 | NMMHCA; DFNA17; EPST   | 0.0220959   | 4.18576 |

|              |         |    |                                                                                                                 |                        |            |         |
|--------------|---------|----|-----------------------------------------------------------------------------------------------------------------|------------------------|------------|---------|
| ILMN_2139970 | TRPC1   | 3  | Homo sapiens transient receptor potential cation channel, subfamily C, member 1 (TRPC1), mRNA.                  | HTRP-1; MGC133335; TR  | 0.00329213 | 4.17963 |
| ILMN_1654072 | PSCA    | 8  | Homo sapiens prostate stem cell antigen (PSCA), mRNA.                                                           | PRO232                 | 0.00078298 | 4.17902 |
| ILMN_1796734 | NPIP    | 16 | Homo sapiens nuclear pore complex interacting protein (NPIP), mRNA.                                             |                        | 0.0053826  | 4.16448 |
| ILMN_1699521 | COL3A1  | 2  | Homo sapiens collagen, type III, alpha 1 (Ehlers-Danlos syndrome type IV, autosomal dominant) (COL3A1), mRNA.   | FLJ34534; EDS4A        | 0.00603648 | 4.13894 |
| ILMN_1699856 | PCSK6   | 15 | Homo sapiens proprotein convertase subtilisin/kexin type 6 (PCSK6), transcript variant 5, mRNA.                 | SPC4; PACE4            | 0.0061256  | 4.13347 |
| ILMN_1651610 | SAA1    | 11 | Homo sapiens serum amyloid A1 (SAA1), transcript variant 1, mRNA.                                               | MGC111216; SAA; PIG4;  | 0.0122741  | 4.12011 |
| ILMN_1791328 | ZNF83   | 19 | Homo sapiens zinc finger protein 83 (ZNF83), mRNA.                                                              | MGC33853; FLJ90585; H  | 0.0402776  | 4.11856 |
| ILMN_1699631 | C9orf19 | 9  | Homo sapiens chromosome 9 open reading frame 19 (C9orf19), mRNA.                                                | GLIPR2; GAPR-1         | 0.0114268  | 4.11786 |
| ILMN_2146761 | CYBRD1  | 2  | Homo sapiens cytochrome b reductase 1 (CYBRD1), mRNA.                                                           | FLJ23462; FRRS3; DCYTE | 0.0094253  | 4.11201 |
| ILMN_2084825 |         |    | Homo sapiens cDNA FLJ13267 fis, clone OVARC1000964                                                              |                        | 0.0136562  | 4.10815 |
| ILMN_2308849 | WSB1    | 17 | Homo sapiens WD repeat and SOCS box-containing 1 (WSB1), transcript variant 2, mRNA.                            | WSB-1; SWIP1           | 0.011657   | 4.09904 |
| ILMN_1710434 | UACA    | 15 | Homo sapiens uveal autoantigen with coiled-coil domains and ankyrin repeats (UACA), transcript variant 1, mRNA. | MGC141967; FLJ10128; M | 0.0498025  | 4.0806  |

|              |           |    |                                                                                                                                 |                        |             |         |
|--------------|-----------|----|---------------------------------------------------------------------------------------------------------------------------------|------------------------|-------------|---------|
| ILMN_2163873 | C6orf151  | 6  | Homo sapiens chromosome 6 open reading frame 151 (C6orf151), mRNA.                                                              | dJ336K20B.1; FLJ32234; | 0.029208    | 4.07842 |
| ILMN_1810191 | FGA       | 4  | Homo sapiens fibrinogen alpha chain (FGA), transcript variant alpha-E, mRNA.                                                    | MGC119425; MGC119423   | 0.000975683 | 4.05568 |
| ILMN_1696391 | LOC654244 |    | PREDICTED: Homo sapiens similar to mitochondrial carrier protein MGC4399 (LOC654244), mRNA.                                     |                        | 0.0112632   | 4.05263 |
| ILMN_2315979 | ANK3      | 10 | Homo sapiens ankyrin 3, node of Ranvier (ankyrin G) (ANK3), transcript variant 2, mRNA.                                         | ANKYRIN-G; FLJ45464    | 0.0036603   | 4.05029 |
| ILMN_1738075 |           |    | UI-CF-FN0-aes-k-15-0-UI.s1 UI-CF-FN0 Homo sapiens cDNA clone UI-CF-FN0-aes-k-15-0-UI 3, mRNA sequence                           |                        | 0.00159714  | 4.04603 |
| ILMN_2414268 | C9orf75   | 9  | Homo sapiens chromosome 9 open reading frame 75 (C9orf75), mRNA.                                                                | MGC131933; RP11-3500   | 0.024723    | 4.04519 |
| ILMN_1712305 | MGAT2     | 14 | Homo sapiens mannosyl (alpha-1,6-)-glycoprotein beta-1,2-N-acetylglucosaminyltransferase (MGAT2), transcript variant 2, mRNA.   | GNT-II; CDGS2; GLCNAC  | 0.0298026   | 4.02598 |
| ILMN_2352097 | HSD17B11  | 4  | Homo sapiens hydroxysteroid (17-beta) dehydrogenase 11 (HSD17B11), mRNA.                                                        | DHRS8; PAN1B; RETSDR   | 0.0242367   | 4.01785 |
| ILMN_2307861 | LOC728358 | 8  | Homo sapiens defensin, alpha 1 (LOC728358), mRNA.                                                                               |                        | 0.00448797  | 4.01148 |
| ILMN_1656560 | ACACB     | 12 | Homo sapiens acetyl-Coenzyme A carboxylase beta (ACACB), mRNA.                                                                  | ACC2; ACCB; HACC275    | 0.0288032   | 4.00044 |
| ILMN_1769615 | POP5      | 12 | Homo sapiens processing of precursor 5, ribonuclease P/MRP subunit ( <i>S. cerevisiae</i> ) (POP5), transcript variant 3, mRNA. | HSPC004; RPP20; RPP2   | 0.00116571  | 3.97865 |

|              |         |    |                                                                                                                                     |                        |            |         |
|--------------|---------|----|-------------------------------------------------------------------------------------------------------------------------------------|------------------------|------------|---------|
| ILMN_1709795 | CD97    | 19 | Homo sapiens CD97 molecule (CD97), transcript variant 2, mRNA.                                                                      | TM7LN1                 | 0.0405817  | 3.97476 |
| ILMN_1687848 | LMCD1   | 3  | Homo sapiens LIM and cysteine-rich domains 1 (LMCD1), mRNA.                                                                         |                        | 0.0402553  | 3.9747  |
| ILMN_1774602 | ARNT2   | 15 | Homo sapiens aryl-hydrocarbon receptor nuclear translocator 2 (ARNT2), mRNA.                                                        | KIAA0307               | 0.00411538 | 3.96174 |
| ILMN_1684554 | TMEM149 | 19 | Homo sapiens transmembrane protein 149 (TMEM149), mRNA.                                                                             | U2AF1L4; FLJ22573      | 0.00219662 | 3.93599 |
| ILMN_1657683 | MRPL11  | 11 | Homo sapiens mitochondrial ribosomal protein L11 (MRPL11), nuclear gene encoding mitochondrial protein, transcript variant 2, mRNA. | MGC111024; L11mt; CGI  | 0.0103161  | 3.91712 |
| ILMN_1679809 | CMTM3   | 16 | Homo sapiens CKLF-like MARVEL transmembrane domain containing 3 (CMTM3), transcript variant 1, mRNA.                                | BNAS2; CKLFSF3; FLJ317 | 0.0245436  | 3.90744 |
| ILMN_1740555 | CRADD   | 12 | Homo sapiens CASP2 and RIPK1 domain containing adaptor with death domain (CRADD), mRNA.                                             | MGC9163; RAIDD         | 0.0132369  | 3.90334 |
| ILMN_1805466 | PDIA4   | 7  | Homo sapiens protein disulfide isomerase family A, member 4 (PDIA4), mRNA.                                                          | ERP72; ERP70           | 0.025736   | 3.89792 |
| ILMN_1767448 | ATF3    | 1  | Homo sapiens activating transcription factor 3 (ATF3), transcript variant 4, mRNA.                                                  |                        | 0.00245948 | 3.89361 |
| ILMN_1659688 | HEYL    | 1  | Homo sapiens hairy/enhancer-of-split related with YRPW motif-like (HEYL), mRNA.                                                     | MGC12623; HRT3         | 0.0447363  | 3.87464 |
| ILMN_2384122 | CFHR1   | 1  | Homo sapiens complement factor H-related 1 (CFHR1), mRNA.                                                                           | CFHR1P; H36-2; HFL1; F | 0.028579   | 3.8697  |

|              |           |    |                                                                                                               |                          |            |         |
|--------------|-----------|----|---------------------------------------------------------------------------------------------------------------|--------------------------|------------|---------|
| ILMN_1730906 | EFEMP1    | 2  | Homo sapiens EGF-containing fibulin-like extracellular matrix protein 1 (EFEMP1), transcript variant 2, mRNA. | FBNL; MLVT; FLJ35535; F  | 0.0219255  | 3.85932 |
| ILMN_1761733 | TCEA2     | 20 | Homo sapiens transcription elongation factor A (SII), 2 (TCEA2), transcript variant 2, mRNA.                  | TFIIS                    | 0.00593502 | 3.85868 |
| ILMN_1710495 | LOC642197 |    | PREDICTED: Homo sapiens similar to Protein FAM82B (LOC642197), mRNA.                                          |                          | 0.00193731 | 3.839   |
| ILMN_1691884 | PMEPA1    | 20 | Homo sapiens prostate transmembrane protein, androgen induced 1 (PMEPA1), transcript variant 2, mRNA.         | STAG1; PMEPA1            | 0.0128005  | 3.83632 |
| ILMN_2083066 | ARHGDIB   | 12 | Homo sapiens Rho GDP dissociation inhibitor (GDI) beta (ARHGDIB), mRNA.                                       | Ly-GDI; RAP1GN1; GDIA2   | 0.00553702 | 3.82677 |
| ILMN_1674985 | MRPL20    | 1  | Homo sapiens mitochondrial ribosomal protein L20 (MRPL20), nuclear gene encoding mitochondrial protein, mRNA. | MGC4779; L20mt; MGC74    | 0.0247404  | 3.81897 |
| ILMN_1801205 | IER5      | 1  | Homo sapiens immediate early response 5 (IER5), mRNA.                                                         | SBBI48; MGC102760        | 0.0215162  | 3.81353 |
| ILMN_1752899 | COLEC11   | 2  | Homo sapiens collectin sub-family member 11 (COLEC11), transcript variant 2, mRNA.                            | CL-K1-II; CL-K1-IIb; DKF | 0.0221771  | 3.81196 |
| ILMN_2237428 | CD3E      | 11 | Homo sapiens CD3e molecule, epsilon (CD3-TCR complex) (CD3E), mRNA.                                           | T3E; TCRE                | 0.0409445  | 3.80321 |
| ILMN_1727087 | PLAT      | 8  | Homo sapiens plasminogen activator, tissue (PLAT), transcript variant 1, mRNA.                                | T-PA; DKFZp686I03148;    | 0.0011757  | 3.80025 |
| ILMN_2129161 | SAMD9     | 7  | Homo sapiens sterile alpha motif domain containing 9 (SAMD9), mRNA.                                           | KIAA2004; C7orf5; OEF1;  | 0.00353757 | 3.79484 |
| ILMN_1717261 | AOX1      | 2  | Homo sapiens aldehyde oxidase 1 (AOX1), mRNA.                                                                 | AO; AOH1                 | 0.00199457 | 3.79373 |



|              |           |    |                                                                                                                                               |                         |            |         |
|--------------|-----------|----|-----------------------------------------------------------------------------------------------------------------------------------------------|-------------------------|------------|---------|
| ILMN_1705107 | SLCO3A1   | 15 | Homo sapiens solute carrier organic anion transporter family, member 3A1 (SLCO3A1), mRNA.                                                     | FLJ40478; SLC21A11; OA  | 0.0327773  | 3.79338 |
| ILMN_1673639 | TPD52L1   | 6  | Homo sapiens tumor protein D52-like 1 (TPD52L1), transcript variant 3, mRNA.                                                                  | D53; MGC8556; hD53; T   | 0.0300491  | 3.78847 |
| ILMN_1687533 | CNDP1     | 18 | Homo sapiens carnosine dipeptidase 1 (metallopeptidase M20 family) (CNDP1), mRNA.                                                             | CPGL2; CN1; MGC102737   | 0.0159411  | 3.75012 |
| ILMN_1671509 | SIGLEC10  | 19 | Homo sapiens sialic acid binding Ig-like lectin 10 (SIGLEC10), mRNA.                                                                          | SLG2; SIGLEC-10; PRO94  | 0.0206666  | 3.74479 |
| ILMN_2197128 | LOC649841 |    | PREDICTED: Homo sapiens similar to protein immunoreactive with anti-PTH polyclonal antibodies (LOC649841), mRNA.                              |                         | 0.00498723 | 3.72525 |
| ILMN_2121408 | SEMA4D    | 9  | Homo sapiens sema domain, immunoglobulin domain (Ig), transmembrane domain (TM) and short cytoplasmic domain, (semaphorin) 4D (SEMA4D), mRNA. | SEMAJ; M-sema G; M-ser  | 0.00926763 | 3.71581 |
| ILMN_2086077 | CCDC58    | 3  | Homo sapiens coiled-coil domain containing 58 (CCDC58), mRNA.                                                                                 | FLJ33273                | 0.0136285  | 3.70537 |
| ILMN_1667966 | LOC729485 |    | PREDICTED: Homo sapiens hypothetical LOC729485 (LOC729485), mRNA.                                                                             |                         | 0.00287281 | 3.70379 |
| ILMN_1722713 | TIMP2     | 17 | Homo sapiens TIMP metalloproteinase inhibitor 2 (TIMP2), mRNA.                                                                                | CSC-21K                 | 0.00185118 | 3.70155 |
| ILMN_2387385 | ENPP2     | 8  | Homo sapiens ectonucleotide pyrophosphatase/phosphodiesterase 2 (autotaxin) (ENPP2), transcript variant 2, mRNA.                              | NPP2; ATX; LysoPLD; ATX | 0.0302269  | 3.69966 |

|              |          |    |                                                                                                                             |                        |             |         |
|--------------|----------|----|-----------------------------------------------------------------------------------------------------------------------------|------------------------|-------------|---------|
| ILMN_1807042 | PFKP     | 10 | Homo sapiens phosphofructokinase, platelet (PFKP), mRNA.                                                                    | PFKF; PFK-C; FLJ40226  | 0.00152368  | 3.69674 |
| ILMN_2100437 | XK       | X  | Homo sapiens X-linked Kx blood group (McLeod syndrome) (XK), mRNA.                                                          | XKR1; KX; X1k          | 0.0480992   | 3.67969 |
| ILMN_2053829 | SPRED1   | 15 | Homo sapiens sprouty-related, EVH1 domain containing 1 (SPRED1), mRNA.                                                      | NFLS; FLJ33903         | 0.0212071   | 3.66996 |
| ILMN_1811387 | ELOVL6   | 4  | Homo sapiens ELOVL family member 6, elongation of long chain fatty acids (FEN1/Elo2, SUR4/Elo3-like, yeast) (ELOVL6), mRNA. | MGC5487; FLJ23378; FAE | 0.00218987  | 3.65464 |
| ILMN_2262444 | PTGER4   | 5  | Homo sapiens prostaglandin E receptor 4 (subtype EP4) (PTGER4), mRNA.                                                       | EP4R; MGC126583; EP4   | 0.0195408   | 3.64827 |
| ILMN_1796678 | RTN1     | 14 | Homo sapiens reticulon 1 (RTN1), transcript variant 1, mRNA.                                                                | NSP; MGC133250         | 0.015589    | 3.6286  |
| ILMN_2341229 | IDH1     | 2  | Homo sapiens isocitrate dehydrogenase 1 (NADP+), soluble (IDH1), mRNA.                                                      | PICD; IDH; IDP         | 0.00336743  | 3.6187  |
| ILMN_1702691 | AP1G2    | 14 | Homo sapiens adaptor-related protein complex 1, gamma 2 subunit (AP1G2), transcript variant 1, mRNA.                        | G2AD                   | 0.00188199  | 3.61807 |
| ILMN_1731206 | WARS     | 14 | Homo sapiens tryptophanyl-tRNA synthetase (WARS), transcript variant 1, mRNA.                                               | IFI53; IFP53; GAMMA-2  | 0.0308821   | 3.6102  |
| ILMN_1769782 | GNA15    | 19 | Homo sapiens guanine nucleotide binding protein (G protein), alpha 15 (Gq class) (GNA15), mRNA.                             | GNA16                  | 0.0186003   | 3.60002 |
| ILMN_1695299 | KIAA0152 | 12 | Homo sapiens KIAA0152 (KIAA0152), mRNA.                                                                                     |                        | 0.000728961 | 3.59614 |
| ILMN_1724994 | VIM      | 10 | Homo sapiens vimentin (VIM), mRNA.                                                                                          | FLJ36605               | 0.010482    | 3.59441 |

|              |          |    |                                                                                                                                      |                         |            |         |
|--------------|----------|----|--------------------------------------------------------------------------------------------------------------------------------------|-------------------------|------------|---------|
| ILMN_1746359 | PLAU     | 10 | Homo sapiens plasminogen activator, urokinase (PLAU), mRNA.                                                                          | UPA; URK; u-PA; ATF     | 0.00282013 | 3.59121 |
| ILMN_1704629 | MUC6     | 11 | Homo sapiens mucin 6, oligomeric mucus/gel-forming (MUC6), mRNA.                                                                     | MUC6 mucin              | 0.0361896  | 3.57932 |
| ILMN_2351466 | MX2      | 21 | Homo sapiens myxovirus (influenza virus) resistance 2 (mouse) (MX2), mRNA.                                                           | MXB                     | 0.00769824 | 3.57134 |
| ILMN_1795251 | RALGDS   | 9  | Homo sapiens ral guanine nucleotide dissociation stimulator (RALGDS), transcript variant 1, mRNA.                                    | RGF; RaIGEF; FLJ20922   | 0.00792582 | 3.5709  |
| ILMN_1682775 | SLC1A1   | 9  | Homo sapiens solute carrier family 1 (neuronal/epithelial high affinity glutamate transporter, system Xag), member 1 (SLC1A1), mRNA. | EAAC1; EAAT3            | 0.0168829  | 3.57057 |
| ILMN_1758497 | TUBA1A   | 12 | Homo sapiens tubulin, alpha 1a (TUBA1A), mRNA.                                                                                       | LIS3; FLJ25113; TUBA3;  | 0.043401   | 3.57045 |
| ILMN_1780799 | TNFRSF25 | 1  | Homo sapiens tumor necrosis factor receptor superfamily, member 25 (TNFRSF25), transcript variant 10, mRNA.                          | WSL-LR; TNFRSF12; TR3   | 0.0279398  | 3.56781 |
| ILMN_1691364 | MT1A     | 16 | Homo sapiens metallothionein 1A (MT1A), mRNA.                                                                                        | MTC; MT1; MGC32848; M   | 0.0405619  | 3.56167 |
| ILMN_1687652 | CEP68    | 2  | Homo sapiens centrosomal protein 68kDa (CEP68), mRNA.                                                                                | FLJ25920; KIAA0582      | 0.00339245 | 3.54584 |
| ILMN_2193325 | PPP1R13L | 19 | Homo sapiens protein phosphatase 1, regulatory (inhibitor) subunit 13 like (PPP1R13L), mRNA.                                         | IASPP; RAI; iASPP gene; | 0.00156644 | 3.54342 |
| ILMN_2174805 | SLC44A3  | 1  | Homo sapiens solute carrier family 44, member 3 (SLC44A3), mRNA.                                                                     | CTL3; MGC45474          | 0.0295907  | 3.54199 |
| ILMN_1684349 | DAB2     | 5  | Homo sapiens disabled homolog 2, mitogen-responsive phosphoprotein (Drosophila) (DAB2), mRNA.                                        | FLJ26626; DOC2; DOC-2   | 0.0278776  | 3.53155 |

|              |           |    |                                                                                                                                            |                         |            |         |
|--------------|-----------|----|--------------------------------------------------------------------------------------------------------------------------------------------|-------------------------|------------|---------|
| ILMN_2336609 | CD6       | 11 | Homo sapiens CD6 molecule (CD6), mRNA.                                                                                                     | TP120                   | 0.0112768  | 3.53115 |
| ILMN_2174341 | BCL2      | 18 | Homo sapiens B-cell CLL/lymphoma 2 (BCL2), nuclear gene encoding mitochondrial protein, transcript variant alpha, mRNA.                    | Bcl-2                   | 0.0334303  | 3.52841 |
| ILMN_1735930 | FUT4      | 11 | Homo sapiens fucosyltransferase 4 (alpha (1,3) fucosyltransferase, myeloid-specific) (FUT4), mRNA.                                         | FCT3A; ELFT; FUC-TIV; C | 0.00316266 | 3.52289 |
| ILMN_2043079 | MEG3      | 14 | Homo sapiens maternally expressed 3 (MEG3) on chromosome 14. XR_001346-XR_001372                                                           | PRO2160; FP504; GTL2;   | 0.0242919  | 3.51509 |
| ILMN_1702231 | GJA1      | 6  | Homo sapiens gap junction protein, alpha 1, 43kDa (GJA1), mRNA.                                                                            | GJAL; DFNB38; CX43; O   | 0.00511737 | 3.49804 |
| ILMN_1801077 | KDEL2     | 7  | Homo sapiens KDEL (Lys-Asp-Glu-Leu) endoplasmic reticulum protein retention receptor 2 (KDEL2), transcript variant 1, mRNA.                | ELP-1; ERD2.2           | 0.0198852  | 3.48751 |
| ILMN_1775931 | DTX3L     | 3  | Homo sapiens deltex 3-like (Drosophila) (DTX3L), mRNA.                                                                                     | BBAP                    | 0.0157886  | 3.4862  |
| ILMN_1778924 | SOX9      | 17 | Homo sapiens SRY (sex determining region Y)-box 9 (campomelic dysplasia, autosomal sex-reversal) (SOX9), mRNA.                             | CMPD1; CMD1; SRA1       | 0.0118169  | 3.48593 |
| ILMN_1659913 | SERPINA10 | 14 | Homo sapiens serpin peptidase inhibitor, clade A (alpha-1 antiproteinase, antitrypsin), member 10 (SERPINA10), transcript variant 1, mRNA. | PZI; ZPI                | 0.0173188  | 3.48355 |

|              |           |    |                                                                                                                                       |                         |            |         |
|--------------|-----------|----|---------------------------------------------------------------------------------------------------------------------------------------|-------------------------|------------|---------|
| ILMN_1653203 | C20orf121 | 20 | Homo sapiens chromosome 20 open reading frame 121 (C20orf121), transcript variant 1, mRNA.                                            | DKFZp686E0870; MGC24    | 0.00264013 | 3.47969 |
| ILMN_1781010 | ZFPM2     | 8  | Homo sapiens zinc finger protein, multitype 2 (ZFPM2), mRNA.                                                                          | DIH3; ZNF89B; FOG2; hF  | 0.00719513 | 3.46297 |
| ILMN_1652631 | DPH5      | 1  | Homo sapiens DPH5 homolog (S. cerevisiae) (DPH5), transcript variant 3, mRNA.                                                         | MGC61450; AD-018; NPD   | 0.00139887 | 3.45134 |
| ILMN_1716397 | POLE2     | 14 | Homo sapiens polymerase (DNA directed), epsilon 2 (p59 subunit) (POLE2), mRNA.                                                        | DPE2                    | 0.032266   | 3.44745 |
| ILMN_2197365 | PTGS2     | 1  | Homo sapiens prostaglandin-endoperoxide synthase 2 (prostaglandin G/H synthase and cyclooxygenase) (PTGS2), mRNA.                     | PHS-2; COX-2; hCox-2; C | 0.00397639 | 3.43995 |
| ILMN_1778723 | VEGFC     | 4  | Homo sapiens vascular endothelial growth factor C (VEGFC), mRNA.                                                                      | VRP; Flt4-L             | 0.0042059  | 3.42198 |
| ILMN_1662419 | C21orf33  | 21 | Homo sapiens chromosome 21 open reading frame 33 (C21orf33), nuclear gene encoding mitochondrial protein, transcript variant 1, mRNA. | ES1; GT335; HES1; KNP-  | 0.00267637 | 3.42088 |
| ILMN_1808404 | ITGB2     | 21 | Homo sapiens integrin, beta 2 (complement component 3 receptor 3 and 4 subunit) (ITGB2), mRNA.                                        | MAC-1; LFA-1; MF17; LC  | 0.00607652 | 3.41776 |
| ILMN_2125747 | WAS       | X  | Homo sapiens Wiskott-Aldrich syndrome (eczema-thrombocytopenia) (WAS), mRNA.                                                          | WASP; IMD2; THC         | 0.0146269  | 3.41691 |
| ILMN_2395375 | HLA-H     | 6  | Homo sapiens major histocompatibility complex, class I, H (pseudogene) (HLA-H) on chromosome 6.                                       | HLAHP                   | 0.0125307  | 3.41456 |

|              |          |    |                                                                                                                 |                         |            |         |
|--------------|----------|----|-----------------------------------------------------------------------------------------------------------------|-------------------------|------------|---------|
| ILMN_2347145 | VSNL1    | 2  | Homo sapiens visinin-like 1 (VSNL1), mRNA.                                                                      | HPCAL3; VILIP-1; HUVISL | 0.0154167  | 3.41378 |
| ILMN_1757552 | ALDH1A3  | 15 | Homo sapiens aldehyde dehydrogenase 1 family, member A3 (ALDH1A3), mRNA.                                        | RALDH3; ALDH6; ALDH1A   | 0.00365564 | 3.40622 |
| ILMN_1756992 | MAOA     | X  | Homo sapiens monoamine oxidase A (MAOA), nuclear gene encoding mitochondrial protein, mRNA.                     |                         | 0.0353614  | 3.39124 |
| ILMN_1815652 | SLC25A26 | 3  | Homo sapiens solute carrier family 25, member 26 (SLC25A26), nuclear gene encoding mitochondrial protein, mRNA. | SAMC; DKFZp434E079; F   | 0.0362036  | 3.38503 |
| ILMN_1795089 | HLA-DMA  | 6  | Homo sapiens major histocompatibility complex, class II, DM alpha (HLA-DMA), mRNA.                              | HLADM; RING6; DMA; D6   | 0.018532   | 3.38201 |
| ILMN_1670490 | KLHL17   | 1  | Homo sapiens kelch-like 17 (Drosophila) (KLHL17), mRNA.                                                         | RP11-5407.6             | 0.00483998 | 3.37282 |
| ILMN_1659936 | MT1F     | 16 | Homo sapiens metallothionein 1F (MT1F), mRNA.                                                                   | MT1; MGC32732           | 0.0235234  | 3.3669  |
| ILMN_1664362 | FGL1     | 8  | Homo sapiens fibrinogen-like 1 (FGL1), transcript variant 1, mRNA.                                              | LFIRE1; HP-041; MGC124  | 0.00313359 | 3.35019 |
| ILMN_2376859 | SLC2A6   | 9  | Homo sapiens solute carrier family 2 (facilitated glucose transporter), member 6 (SLC2A6), mRNA.                | GLUT6; HSA011372; GLU   | 0.0471558  | 3.34416 |
| ILMN_1807439 | CDH11    | 16 | Homo sapiens cadherin 11, type 2, OB-cadherin (osteoblast) (CDH11), mRNA.                                       | CDHOB; CAD11; OB; OSF   | 0.0104832  | 3.34181 |
| ILMN_1724718 | MYL9     | 20 | Homo sapiens myosin, light chain 9, regulatory (MYL9), transcript variant 1, mRNA.                              | LC20; MYRL2; MRLC1; ML  | 0.0174655  | 3.33683 |
| ILMN_1813139 |          |    | Homo sapiens mRNA; cDNA DKFZp434C128 (from clone DKFZp434C128)                                                  |                         | 0.00572145 | 3.3342  |

|              |           |    |                                                                                                                                            |                        |             |         |
|--------------|-----------|----|--------------------------------------------------------------------------------------------------------------------------------------------|------------------------|-------------|---------|
| ILMN_1710937 | LOC730994 |    | PREDICTED: Homo sapiens similar to NACHT, leucine rich repeat and PYD (pyrin domain) containing 1, transcript variant 1 (LOC730994), mRNA. |                        | 0.0139195   | 3.33398 |
| ILMN_1699931 | GYG2      | X  | Homo sapiens glycogenin 2 (GYG2), transcript variant 2, mRNA.                                                                              | GN-2; GN2              | 0.0491526   | 3.32517 |
| ILMN_1700310 | NKD2      | 5  | Homo sapiens naked cuticle homolog 2 (Drosophila) (NKD2), mRNA.                                                                            | Naked2                 | 0.0401528   | 3.31883 |
| ILMN_1765109 | FLJ14213  | 11 | Homo sapiens protor-2 (FLJ14213), mRNA.                                                                                                    | MGC16218               | 0.00649338  | 3.3113  |
| ILMN_1666819 | EI24      | 11 | Homo sapiens etoposide induced 2.4 mRNA (EI24), transcript variant 1, mRNA.                                                                | TP53I8; PIG8           | 0.00724179  | 3.30037 |
| ILMN_1803094 | FAM131A   | 3  | Homo sapiens family with sequence similarity 131, member A (FAM131A), mRNA.                                                                | MGC21688; PRO1378; FL  | 0.0148076   | 3.29858 |
| ILMN_1721876 | COL6A1    | 21 | Homo sapiens collagen, type VI, alpha 1 (COL6A1), mRNA.                                                                                    | OPLL                   | 0.0165028   | 3.2978  |
| ILMN_2231928 | LOC652493 |    | PREDICTED: Homo sapiens similar to Ig kappa chain V-I region HK102 precursor (LOC652493), mRNA.                                            |                        | 0.0290279   | 3.2805  |
| ILMN_1736939 | C8orf70   | 8  | Homo sapiens chromosome 8 open reading frame 70 (C8orf70), mRNA.                                                                           | CGI-62                 | 0.00929602  | 3.2747  |
| ILMN_1769575 | GATS      | 7  | Homo sapiens opposite strand transcription unit to STAG3 (GATS), mRNA.                                                                     | DKFZp686B07267         | 0.000652331 | 3.26857 |
| ILMN_2208413 | CLEC2B    | 12 | Homo sapiens C-type lectin domain family 2, member B (CLEC2B), mRNA.                                                                       | AICL; IFNRG1; HP10085; | 0.0201189   | 3.26228 |
| ILMN_1754969 | TGFB3     | 14 | Homo sapiens transforming growth factor, beta 3 (TGFB3), mRNA.                                                                             | FLJ16571; ARVD; TGF-be | 0.00192331  | 3.26149 |

|              |           |    |                                                                                                                             |                         |            |         |
|--------------|-----------|----|-----------------------------------------------------------------------------------------------------------------------------|-------------------------|------------|---------|
| ILMN_2373791 | ENPP2     | 8  | Homo sapiens ectonucleotide pyrophosphatase/phosphodiesterase 2 (autotaxin) (ENPP2), transcript variant 2, mRNA.            | NPP2; ATX; LysoPLD; ATX | 0.0266877  | 3.2608  |
| ILMN_1704554 | HAMP      | 19 | Homo sapiens hepcidin antimicrobial peptide (HAMP), mRNA.                                                                   | HFE2B; LEAP1; LEAP-1; H | 0.00168964 | 3.25383 |
| ILMN_1814194 | ENPP5     | 6  | Homo sapiens ectonucleotide pyrophosphatase/phosphodiesterase 5 (putative function) (ENPP5), mRNA.                          | KIAA0879                | 0.00357115 | 3.25364 |
| ILMN_2181892 | HM13      | 20 | Homo sapiens histocompatibility (minor) 13 (HM13), transcript variant 2, mRNA.                                              | MSTP086; H13; IMPAS; S  | 0.0423547  | 3.25187 |
| ILMN_1769926 | COL15A1   | 9  | Homo sapiens collagen, type XV, alpha 1 (COL15A1), mRNA.                                                                    | FLJ38566                | 0.0415359  | 3.25061 |
| ILMN_2157441 | LOC728358 | 8  | Homo sapiens defensin, alpha 1 (LOC728358), mRNA.                                                                           |                         | 0.027375   | 3.24604 |
| ILMN_2376847 | BCL11A    | 2  | Homo sapiens B-cell CLL/lymphoma 11A (zinc finger protein) (BCL11A), transcript variant 1, mRNA.                            | BCL11A-L; CTIP1; FLJ101 | 0.00694029 | 3.23678 |
| ILMN_1691508 | FCGR2A    | 1  | Homo sapiens Fc fragment of IgG, low affinity IIa, receptor (CD32) (FCGR2A), mRNA.                                          | FCGR2A1; CDw32; CD32,   | 0.00122377 | 3.23427 |
| ILMN_1675062 | TGFBI     | 5  | Homo sapiens transforming growth factor, beta-induced, 68kDa (TGFBI), mRNA.                                                 | CSD1; CSD2; CDB1; CDG   | 0.00225935 | 3.22982 |
| ILMN_1735192 | RGS11     | 16 | Homo sapiens regulator of G-protein signaling 11 (RGS11), transcript variant 1, mRNA.                                       | RS11                    | 0.0449565  | 3.22368 |
| ILMN_1710209 | DHODH     | 16 | Homo sapiens dihydroorotate dehydrogenase (DHODH), nuclear gene encoding mitochondrial protein, transcript variant 2, mRNA. | DHOdehase               | 0.00816658 | 3.21572 |



|              |          |    |                                                                                                                                                 |                         |             |         |
|--------------|----------|----|-------------------------------------------------------------------------------------------------------------------------------------------------|-------------------------|-------------|---------|
| ILMN_1698732 | MMP23B   | 1  | Homo sapiens matrix metalloproteinase 23B (MMP23B), mRNA.                                                                                       | MIFR-1; MIFR; MMP22     | 0.012499    | 3.21561 |
| ILMN_2137789 | NR2F6    | 19 | Homo sapiens nuclear receptor subfamily 2, group F, member 6 (NR2F6), mRNA.                                                                     | EAR-2; EAR2; ERBAL2     | 0.0014239   | 3.21284 |
| ILMN_1748281 | SLC25A12 | 2  | Homo sapiens solute carrier family 25 (mitochondrial carrier, Aralar), member 12 (SLC25A12), nuclear gene encoding mitochondrial protein, mRNA. | ARALAR1; ARALAR         | 0.0340309   | 3.20947 |
| ILMN_1676088 | PCSK9    | 1  | Homo sapiens proprotein convertase subtilisin/kexin type 9 (PCSK9), mRNA.                                                                       | NARC1; NARC-1; HCHOLA   | 0.0018674   | 3.20732 |
| ILMN_1790859 | WISP1    | 8  | Homo sapiens WNT1 inducible signaling pathway protein 1 (WISP1), transcript variant 1, mRNA.                                                    | WISP1tc; WISP1i; WISP1  | 0.000655317 | 3.20655 |
| ILMN_2254635 | GSTM1    | 1  | Homo sapiens glutathione S-transferase M1 (GSTM1), transcript variant 1, mRNA.                                                                  | MGC26563; GSTM1-1; H-   | 0.00535395  | 3.202   |
| ILMN_1789096 | ARMET    | 3  | Homo sapiens arginine-rich, mutated in early stage tumors (ARMET), mRNA.                                                                        | MANF; MGC142150; ARP;   | 0.0159442   | 3.20135 |
| ILMN_1801119 | MPO      | 17 | Homo sapiens myeloperoxidase (MPO), nuclear gene encoding mitochondrial protein, mRNA.                                                          |                         | 0.029587    | 3.19845 |
| ILMN_2415179 | MX1      | 21 | Homo sapiens myxovirus (influenza virus) resistance 1, interferon-inducible protein p78 (mouse) (MX1), mRNA.                                    | MxA; IFI78; MX; IFI-78K | 0.00601598  | 3.19151 |
| ILMN_1663080 | ZBTB46   | 20 | Homo sapiens zinc finger and BTB domain containing 46 (ZBTB46), mRNA.                                                                           | BTBD4; ZNF340; FLJ1350  | 1.62E-05    | 3.17081 |
| ILMN_1764266 | UCRC     | 22 | Homo sapiens ubiquinol-cytochrome c reductase complex (7.2 kD) (UCRC), transcript variant 1, mRNA.                                              | HSPC151; HSPC051; HSP   | 0.0364089   | 3.15348 |

|              |           |    |                                                                                                                          |                       |             |         |
|--------------|-----------|----|--------------------------------------------------------------------------------------------------------------------------|-----------------------|-------------|---------|
| ILMN_1673363 | MAPKAP1   | 9  | Homo sapiens mitogen-activated protein kinase associated protein 1 (MAPKAP1), transcript variant 1, mRNA.                | MGC2745; MIP1; SIN1b; | 0.00603643  | 3.15236 |
| ILMN_2218208 | BBOX1     | 11 | Homo sapiens butyrobetaine (gamma), 2-oxoglutarate dioxygenase (gamma-butyrobetaine hydroxylase) 1 (BBOX1), mRNA.        | G-BBH; BBOX; gamma-B  | 0.00286577  | 3.14109 |
| ILMN_2405009 | ADH5      | 4  | Homo sapiens alcohol dehydrogenase 5 (class III), chi polypeptide (ADH5), mRNA.                                          | ADH-3; ADHX; FDH      | 0.0027022   | 3.12901 |
| ILMN_1752520 | CD163     | 12 | Homo sapiens CD163 molecule (CD163), transcript variant 2, mRNA.                                                         | MM130; M130           | 0.0114604   | 3.12242 |
| ILMN_1721770 | SHMT1     | 17 | Homo sapiens serine hydroxymethyltransferase 1 (soluble) (SHMT1), transcript variant 1, mRNA.                            | MGC15229; MGC24556; S | 0.024263    | 3.12196 |
| ILMN_2340259 | S100A10   | 1  | Homo sapiens S100 calcium binding protein A10 (annexin II ligand, calpactin I, light polypeptide (p11)) (S100A10), mRNA. | ANX2L; MGC111133; ANX | 0.00579303  | 3.12178 |
| ILMN_1701204 | CSRP1     | 1  | Homo sapiens cysteine and glycine-rich protein 1 (CSRP1), mRNA.                                                          | CRP; CRP1; DKFZp686M1 | 0.0113099   | 3.12027 |
| ILMN_2407389 | C8orf38   | 8  | Homo sapiens chromosome 8 open reading frame 38 (C8orf38), mRNA.                                                         | MGC40214              | 0.0301294   | 3.10865 |
| ILMN_1801504 | TMEM177   | 2  | Homo sapiens transmembrane protein 177 (TMEM177), mRNA.                                                                  | MGC10993              | 0.000548708 | 3.10125 |
| ILMN_1668063 | LOC642755 | 15 | PREDICTED: Homo sapiens similar to DEXI, transcript variant 1 (LOC642755), mRNA.                                         |                       | 0.0261742   | 3.09984 |

|              |           |    |                                                                                                  |                         |            |         |
|--------------|-----------|----|--------------------------------------------------------------------------------------------------|-------------------------|------------|---------|
| ILMN_1655796 | SLC20A1   | 2  | Homo sapiens solute carrier family 20 (phosphate transporter), member 1 (SLC20A1), mRNA.         | Glv-1; PiT-1; FLJ41426; | 0.027237   | 3.09854 |
| ILMN_1717557 | C4BPB     | 1  | Homo sapiens complement component 4 binding protein, beta (C4BPB), transcript variant 5, mRNA.   | C4BP                    | 0.0271004  | 3.0985  |
| ILMN_1688780 | MGP       | 12 | Homo sapiens matrix Gla protein (MGP), mRNA.                                                     | NTI; GIG36; MGLAP       | 0.016416   | 3.09264 |
| ILMN_1770290 | MYLIP     | 6  | Homo sapiens myosin regulatory light chain interacting protein (MYLIP), mRNA.                    | MIR                     | 0.0106294  | 3.07787 |
| ILMN_1751851 | LOC729085 | 3  | PREDICTED: Homo sapiens hypothetical protein LOC729085 (LOC729085), mRNA.                        |                         | 0.0153343  | 3.07581 |
| ILMN_1770338 | NRP1      | 10 | Homo sapiens neuropilin 1 (NRP1), transcript variant 1, mRNA.                                    | DKFZp781F1414; VEGF16   | 0.0152799  | 3.07571 |
| ILMN_1788019 | FLNC      | 7  | Homo sapiens filamin C, gamma (actin binding protein 280) (FLNC), mRNA.                          | FLN2; ABPL; ABPA; FLJ10 | 0.0360008  | 3.07444 |
| ILMN_1782788 | SEPX1     | 16 | Homo sapiens selenoprotein X, 1 (SEPX1), mRNA.                                                   | MSRB1; SELR; MGC3344;   | 0.00248361 | 3.07365 |
| ILMN_1654735 | SLC30A1   | 1  | Homo sapiens solute carrier family 30 (zinc transporter), member 1 (SLC30A1), mRNA.              | ZNT1; ZRC1              | 0.00706931 | 3.07207 |
| ILMN_1727532 | OSBPL5    | 11 | Homo sapiens oxysterol binding protein-like 5 (OSBPL5), transcript variant 2, mRNA.              | ORP5; FLJ42929; OBPH1   | 0.0434045  | 3.0687  |
| ILMN_1693334 | PTPRE     | 10 | Homo sapiens protein tyrosine phosphatase, receptor type, E (PTPRE), transcript variant 2, mRNA. | DKFZp313F1310; PTPE; H  | 0.0367033  | 3.04901 |
| ILMN_2145116 | C11orf9   | 11 | Homo sapiens chromosome 11 open reading frame 9 (C11orf9), mRNA.                                 | MGC10781; KIAA0954      | 0.00452912 | 3.03204 |

|              |          |    |                                                                                                                                                               |                         |            |         |
|--------------|----------|----|---------------------------------------------------------------------------------------------------------------------------------------------------------------|-------------------------|------------|---------|
| ILMN_1777325 | RELB     | 19 | Homo sapiens v-rel reticuloendotheliosis viral oncogene homolog B, nuclear factor of kappa light polypeptide gene enhancer in B-cells 3 (avian) (RELB), mRNA. | I-REL                   | 0.0242155  | 3.01611 |
| ILMN_1785202 | THPO     | 3  | Homo sapiens thrombopoietin (myeloproliferative leukemia virus oncogene ligand, megakaryocyte growth and development factor) (THPO), mRNA.                    | TPO; MPLLG; MGC163194   | 0.0183557  | 3.00537 |
| ILMN_1692058 | RNASE2   | 14 | Homo sapiens ribonuclease, RNase A family, 2 (liver, eosinophil-derived neurotoxin) (RNASE2), mRNA.                                                           | EDN; RNS2               | 0.00811795 | 3.00518 |
| ILMN_1661755 | MT1H     | 16 | Homo sapiens metallothionein 1H (MT1H), mRNA.                                                                                                                 | MGC70702; MT1           | 0.0145562  | 2.99956 |
| ILMN_1702636 | PPIL1    | 6  | Homo sapiens peptidylprolyl isomerase (cyclophilin)-like 1 (PPIL1), mRNA.                                                                                     | hCyPX; PPIase; CYPL1; C | 0.0148831  | 2.99916 |
| ILMN_1665792 | CD163    | 12 | Homo sapiens CD163 molecule (CD163), transcript variant 1, mRNA.                                                                                              | MM130; M130             | 0.0226717  | 2.99191 |
| ILMN_2206746 | SERPINA1 | 14 | Homo sapiens serpin peptidase inhibitor, clade A (alpha-1 antiproteinase, antitrypsin), member 1 (SERPINA1), transcript variant 2, mRNA.                      | PI1; MGC23330; PRO227   | 0.00878347 | 2.99175 |
| ILMN_2391150 |          |    | Homo sapiens cDNA clone IMAGE:4830466                                                                                                                         |                         | 0.0184754  | 2.99009 |
| ILMN_1697377 | SLIT2    | 4  | Homo sapiens slit homolog 2 (Drosophila) (SLIT2), mRNA.                                                                                                       | Slit-2; SLIL3; FLJ14420 | 0.0105146  | 2.99002 |
| ILMN_2153916 | CRYAA    | 21 | Homo sapiens crystallin, alpha A (CRYAA), mRNA.                                                                                                               | HSPB4; CRYA1            | 0.00199213 | 2.987   |

|              |           |    |                                                                                                   |                         |            |         |
|--------------|-----------|----|---------------------------------------------------------------------------------------------------|-------------------------|------------|---------|
| ILMN_2309848 | LOC652694 |    | PREDICTED: Homo sapiens similar to Ig kappa chain V-I region HK102 precursor (LOC652694), mRNA.   |                         | 0.00839992 | 2.98389 |
| ILMN_1676893 | ABCA1     | 9  | Homo sapiens ATP-binding cassette, sub-family A (ABC1), member 1 (ABCA1), mRNA.                   | CERP; ABC-1; MGC16486   | 0.00229249 | 2.98155 |
| ILMN_1752502 | TRIB3     | 20 | Homo sapiens tribbles homolog 3 (Drosophila) (TRIB3), mRNA.                                       | TRB3; C20orf97; SKIP3;  | 0.0428968  | 2.9788  |
| ILMN_1719641 | FGF9      | 13 | Homo sapiens fibroblast growth factor 9 (glia-activating factor) (FGF9), mRNA.                    | MGC119914; GAF; MGC1    | 0.0185803  | 2.97829 |
| ILMN_1811258 | NTN1      | 17 | Homo sapiens netrin 1 (NTN1), mRNA.                                                               | NTN1L                   | 0.00639808 | 2.97768 |
| ILMN_1717934 | EMILIN1   | 2  | Homo sapiens elastin microfibril interfacier 1 (EMILIN1), mRNA.                                   | EMILIN-1; EMILIN; gp115 | 0.00141482 | 2.97685 |
| ILMN_2258816 | LOC644334 |    | PREDICTED: Homo sapiens similar to Band 4.1-like protein 5 (LOC644334), mRNA.                     |                         | 0.0214141  | 2.96756 |
| ILMN_1725387 | SLC45A4   | 8  | PREDICTED: Homo sapiens solute carrier family 45, member 4, transcript variant 2 (SLC45A4), mRNA. |                         | 0.003121   | 2.96722 |
| ILMN_1719986 | TMEM99    | 17 | Homo sapiens transmembrane protein 99 (TMEM99), mRNA.                                             | MGC21518                | 0.0431822  | 2.9621  |
| ILMN_1785646 | RNF19A    | 8  | Homo sapiens ring finger protein 19A (RNF19A), transcript variant 2, mRNA.                        | RNF19; DKFZp566B1346;   | 0.014502   | 2.95884 |
| ILMN_1717163 | FAM86B1   | 8  | Homo sapiens family with sequence similarity 86, member B1 (FAM86B1), transcript variant 1, mRNA. | MGC16279; MGC104828     | 0.0110616  | 2.95732 |

|              |         |    |                                                                                                                        |                        |             |         |
|--------------|---------|----|------------------------------------------------------------------------------------------------------------------------|------------------------|-------------|---------|
| ILMN_1801766 | GALNTL1 | 14 | Homo sapiens UDP-N-acetyl-alpha-D-galactosamine: polypeptide N-acetylgalactosaminyltransferase-like 1 (GALNTL1), mRNA. | MGC141855; GALNT16; k  | 0.0342797   | 2.95709 |
| ILMN_1771376 | NUDT6   | 4  | Homo sapiens nudix (nucleoside diphosphate linked moiety X)-type motif 6 (NUDT6), transcript variant 1, mRNA.          | ASFGF2; gfg-1; FGF-AS; | 0.000969952 | 2.94705 |
| ILMN_1801043 | C2orf40 | 2  | Homo sapiens chromosome 2 open reading frame 40 (C2orf40), mRNA.                                                       | ECRG4                  | 0.0107084   | 2.93389 |
| ILMN_2149226 | FAM20A  | 17 | Homo sapiens family with sequence similarity 20, member A (FAM20A), mRNA.                                              | DKFZp434F2322; FP2747  | 0.00200622  | 2.93341 |
| ILMN_1652371 | GRPEL1  | 4  | Homo sapiens GrpE-like 1, mitochondrial (E. coli) (GRPEL1), nuclear gene encoding mitochondrial protein, mRNA.         | HMGE; FLJ25609         | 0.00723447  | 2.93182 |
| ILMN_2337655 | LAX1    | 1  | Homo sapiens lymphocyte transmembrane adaptor 1 (LAX1), mRNA.                                                          | LAX; FLJ20340          | 0.000585899 | 2.92714 |
| ILMN_2332553 | NTHL1   | 16 | Homo sapiens nth endonuclease III-like 1 (E. coli) (NTHL1), mRNA.                                                      | NTH1; OCTS3            | 0.0115734   | 2.92129 |
| ILMN_1750101 | IGSF9   | 1  | Homo sapiens immunoglobulin superfamily, member 9 (IGSF9), mRNA.                                                       | KIAA1355; FP18798; Nrt | 0.0327728   | 2.92007 |
| ILMN_1744487 | NR4A2   | 2  | Homo sapiens nuclear receptor subfamily 4, group A, member 2 (NR4A2), transcript variant 1, mRNA.                      | RNR1; NOT; TINUR; NUR  | 0.0299863   | 2.91835 |
| ILMN_1807339 | HOPX    | 4  | Homo sapiens HOP homeobox (HOPX), transcript variant 3, mRNA.                                                          | HOP; MGC20820; LAGY; k | 0.0121983   | 2.91485 |
| ILMN_1766261 | PRKCDBP | 11 | Homo sapiens protein kinase C, delta binding protein (PRKCDBP), mRNA.                                                  | HSRBC; MGC20400; SRB   | 0.00951458  | 2.91338 |

|              |        |    |                                                                                                                             |                        |             |         |
|--------------|--------|----|-----------------------------------------------------------------------------------------------------------------------------|------------------------|-------------|---------|
| ILMN_2150654 | ACAT2  | 6  | Homo sapiens acetyl-Coenzyme A acetyltransferase 2 (ACAT2), mRNA.                                                           |                        | 0.0121772   | 2.90872 |
| ILMN_2046730 | 3-Mar  | 5  | Homo sapiens membrane-associated ring finger (C3HC4) 3 (MARCH3), mRNA.                                                      | RNF173; MARCH-III; MGC | 0.0165909   | 2.90864 |
| ILMN_1815154 | ARNTL  | 11 | Homo sapiens aryl hydrocarbon receptor nuclear translocator-like (ARNTL), transcript variant 2, mRNA.                       | PASD3; MOP3; BMAL1; M  | 0.0106787   | 2.90722 |
| ILMN_1811921 | ITGAX  | 16 | Homo sapiens integrin, alpha X (complement component 3 receptor 4 subunit) (ITGAX), mRNA.                                   | CD11C                  | 0.000687516 | 2.89764 |
| ILMN_1751886 | PMM2   | 16 | Homo sapiens phosphomannomutase 2 (PMM2), mRNA.                                                                             | CDGS; CDG1a; CDG1      | 0.0191243   | 2.89404 |
| ILMN_1652237 | XLKD1  | 11 | Homo sapiens extracellular link domain containing 1 (XLKD1), mRNA.                                                          | CRSBP-1; LYVE-1; HAR   | 0.00354995  | 2.8912  |
| ILMN_2082130 | STAG3  | 7  | Homo sapiens stromal antigen 3 (STAG3), mRNA.                                                                               |                        | 0.00321211  | 2.8861  |
| ILMN_1732296 | GPAM   | 10 | Homo sapiens glycerol-3-phosphate acyltransferase, mitochondrial (GPAM), nuclear gene encoding mitochondrial protein, mRNA. | GPAT1; MGC26846; KIAA  | 0.0185042   | 2.88091 |
| ILMN_1667081 |        |    | 602629864F1 NCI_CGAP_Skn4 Homo sapiens cDNA clone IMAGE:4754918 5, mRNA sequence                                            |                        | 0.0112636   | 2.87767 |
| ILMN_1715647 | HES4   | 1  | Homo sapiens hairy and enhancer of split 4 (Drosophila) (HES4), mRNA.                                                       |                        | 0.0100825   | 2.87317 |
| ILMN_1764228 | BHLHB3 | 12 | Homo sapiens basic helix-loop-helix domain containing, class B, 3 (BHLHB3), mRNA.                                           | SHARP1; SHARP-1; DEC2  | 0.00186983  | 2.87225 |

|              |         |    |                                                                                                                 |                         |             |         |
|--------------|---------|----|-----------------------------------------------------------------------------------------------------------------|-------------------------|-------------|---------|
| ILMN_1802654 | ADRA2A  | 10 | Homo sapiens adrenergic, alpha-2A-, receptor (ADRA2A), mRNA.                                                    | ZNF32; ALPHA2AAR; ADR   | 0.00328951  | 2.86985 |
| ILMN_1660364 | NHEDC2  | 4  | Homo sapiens Na <sup>+</sup> /H <sup>+</sup> exchanger domain containing 2 (NHEDC2), mRNA.                      | FLJ23984; NHA2          | 0.000659049 | 2.86909 |
| ILMN_1674706 | TFB2M   | 1  | Homo sapiens transcription factor B2, mitochondrial (TFB2M), nuclear gene encoding mitochondrial protein, mRNA. | FLJ22661; Hkp1; FLJ2318 | 0.0121116   | 2.86776 |
| ILMN_2206722 | RBMS3   | 3  | Homo sapiens RNA binding motif, single stranded interacting protein (RBMS3), transcript variant 1, mRNA.        |                         | 0.00910096  | 2.86751 |
| ILMN_1676528 | LILRA3  | 19 | Homo sapiens leukocyte immunoglobulin-like receptor, subfamily A (without TM domain), member 3 (LILRA3), mRNA.  | HM31; LIR-4; e3; CD85E  | 0.0249768   | 2.86256 |
| ILMN_1701875 | ENG     | 9  | Homo sapiens endoglin (Osler-Rendu-Weber syndrome 1) (ENG), mRNA.                                               | ORW; CD105; HHT1; END   | 0.00737917  | 2.85861 |
| ILMN_1769282 | ASGR2   | 17 | Homo sapiens asialoglycoprotein receptor 2 (ASGR2), transcript variant H2', mRNA.                               | L-H2; CLEC4H2; Hs.1259  | 0.00754756  | 2.85826 |
| ILMN_1803429 | ALDH1A1 | 9  | Homo sapiens aldehyde dehydrogenase 1 family, member A1 (ALDH1A1), mRNA.                                        | ALDH11; ALDH-E1; ALDC   | 0.00187591  | 2.8562  |
| ILMN_2157240 | CBLB    | 3  | Homo sapiens Cas-B $\gamma$ -M (murine) ecotropic retroviral transforming sequence b (CBLB), mRNA.              | DKFZp779F1443; FLJ411   | 0.00084686  | 2.85202 |
| ILMN_1723978 | LRRN2   | 1  | Homo sapiens leucine rich repeat neuronal 2 (LRRN2), transcript variant 2, mRNA.                                | FIGLER7; GAC1; LRRN5;   | 0.00919083  | 2.85045 |



|              |         |    |                                                                                                    |                        |            |         |
|--------------|---------|----|----------------------------------------------------------------------------------------------------|------------------------|------------|---------|
| ILMN_1804798 | GCSH    | 16 | Homo sapiens glycine cleavage system protein H (aminomethyl carrier) (GCSH), mRNA.                 | NKH; GCE               | 0.0164526  | 2.84929 |
| ILMN_1739794 | GFOD2   | 16 | Homo sapiens glucose-fructose oxidoreductase domain containing 2 (GFOD2), mRNA.                    | FLJ23802; MGC11335     | 0.0421923  | 2.84903 |
| ILMN_1733538 | NDN     | 15 | Homo sapiens necdin homolog (mouse) (NDN), mRNA.                                                   | HsT16328               | 0.00531437 | 2.84812 |
| ILMN_2128428 | NEIL2   | 8  | Homo sapiens nei like 2 (E. coli) (NEIL2), mRNA.                                                   | FLJ31644; MGC4505; MG  | 9.37E-05   | 2.848   |
| ILMN_1810725 | CCNL1   | 3  | Homo sapiens cyclin L1 (CCNL1), mRNA.                                                              | ania-6a; PRO1073; BM-0 | 0.00103669 | 2.84725 |
| ILMN_1684306 | SLC26A3 | 7  | Homo sapiens solute carrier family 26, member 3 (SLC26A3), mRNA.                                   | CLD; DRA               | 0.029315   | 2.83528 |
| ILMN_1683664 | CD93    | 20 | Homo sapiens CD93 molecule (CD93), mRNA.                                                           | MXRA4; C1qR(P); dJ737E | 0.0120647  | 2.83417 |
| ILMN_1810836 | ICAM3   | 19 | Homo sapiens intercellular adhesion molecule 3 (ICAM3), mRNA.                                      | ICAM-R; CD50; CDW50    | 0.00368945 | 2.83195 |
| ILMN_1811437 | DNAJC19 | 3  | Homo sapiens DnaJ (Hsp40) homolog, subfamily C, member 19 (DNAJC19), mRNA.                         | TIM14; TIMM14          | 0.0373635  | 2.83133 |
| ILMN_1788017 | DDC     | 7  | Homo sapiens dopa decarboxylase (aromatic L-amino acid decarboxylase) (DDC), mRNA.                 | AADC                   | 0.0110469  | 2.82966 |
| ILMN_1844029 | SIDT1   | 3  | Homo sapiens SID1 transmembrane family, member 1 (SIDT1), mRNA.                                    | SID1; B830021E24Rik; F | 0.033752   | 2.81498 |
| ILMN_1660904 | SLC2A10 | 20 | Homo sapiens solute carrier family 2 (facilitated glucose transporter), member 10 (SLC2A10), mRNA. | MGC126706; ATS; GLUT1  | 0.0292806  | 2.81477 |
| ILMN_1731714 | ANGPT1  | 8  | Homo sapiens angiopoietin 1 (ANGPT1), mRNA.                                                        | ANG1; AGP1; AGPT       | 0.0199838  | 2.80932 |

|              |        |    |                                                                                                |                         |             |         |
|--------------|--------|----|------------------------------------------------------------------------------------------------|-------------------------|-------------|---------|
| ILMN_1658498 | COQ3   | 6  | Homo sapiens coenzyme Q3 homolog, methyltransferase ( <i>S. cerevisiae</i> ) (COQ3), mRNA.     | bA9819.1; UG0215E05     | 0.0270768   | 2.80876 |
| ILMN_1809928 | SPINT2 | 19 | Homo sapiens serine peptidase inhibitor, Kunitz type, 2 (SPINT2), mRNA.                        | Kop; PB; HAI-2; HAI2    | 0.0493912   | 2.80845 |
| ILMN_1738147 | ACOT1  | 14 | Homo sapiens acyl-CoA thioesterase 1 (ACOT1), mRNA.                                            | LACH2; ACH2; CTE-1      | 0.0120939   | 2.80213 |
| ILMN_2190414 | DBN1   | 5  | Homo sapiens drebrin 1 (DBN1), transcript variant 1, mRNA.                                     | DKFZp434D064; DOS117    | 0.00521392  | 2.7958  |
| ILMN_1808590 | CMTM8  | 3  | Homo sapiens CKLF-like MARVEL transmembrane domain containing 8 (CMTM8), mRNA.                 | CKLFSF8; CKLFSF8-V2     | 0.023154    | 2.76839 |
| ILMN_2285404 |        |    | BX104232 Soares fetal liver spleen 1NFLS Homo sapiens cDNA clone IMAGp998L09114, mRNA sequence |                         | 0.0164482   | 2.7626  |
| ILMN_1812392 | CPVL   | 7  | Homo sapiens carboxypeptidase, vitellogenic-like (CPVL), transcript variant 1, mRNA.           | HVLP; MGC10029          | 0.00334629  | 2.75945 |
| ILMN_1783304 | GPER   | 7  | Homo sapiens G protein-coupled estrogen receptor 1 (GPER), transcript variant 3, mRNA.         | LyGPR; DRY12; GPCR-Br;  | 0.00445667  | 2.75911 |
| ILMN_1672503 | VLDLR  | 9  | Homo sapiens very low density lipoprotein receptor (VLDLR), transcript variant 2, mRNA.        | FLJ35024; VLDLRCH       | 0.00921     | 2.7589  |
| ILMN_1734543 | TAGLN  | 11 | Homo sapiens transgelin (TAGLN), transcript variant 2, mRNA.                                   | TAGLN1; WS3-10; SM22;   | 0.000775196 | 2.75733 |
| ILMN_2376822 | CAMP   | 3  | Homo sapiens cathelicidin antimicrobial peptide (CAMP), mRNA.                                  | LL37; FALL39; CAP18; HS | 0.0344462   | 2.75648 |

|              |          |    |                                                                                             |                         |             |         |
|--------------|----------|----|---------------------------------------------------------------------------------------------|-------------------------|-------------|---------|
| ILMN_1693338 | HPS5     | 11 | Homo sapiens Hermansky-Pudlak syndrome 5 (HPS5), transcript variant 2, mRNA.                | KIAA1017; AIBP63        | 0.0181176   | 2.7559  |
| ILMN_1808500 | IMPA2    | 18 | Homo sapiens inositol(myo)-1(or 4)-monophosphatase 2 (IMPA2), mRNA.                         |                         | 0.000384648 | 2.75386 |
| ILMN_2366041 | IL1RAP   | 3  | Homo sapiens interleukin 1 receptor accessory protein (IL1RAP), transcript variant 2, mRNA. | FLJ37788; C3orf13; IL1R | 0.0159579   | 2.75076 |
| ILMN_1713561 | PACSIN3  | 11 | Homo sapiens protein kinase C and casein kinase substrate in neurons 3 (PACSIN3), mRNA.     | SDPIII                  | 0.00318316  | 2.74895 |
| ILMN_1705442 | C1orf123 | 1  | Homo sapiens chromosome 1 open reading frame 123 (C1orf123), mRNA.                          | FLJ20580; RP5-1024G6.3  | 0.00249218  | 2.74874 |
| ILMN_1660923 | GRM8     | 7  | Homo sapiens glutamate receptor, metabotropic 8 (GRM8), mRNA.                               | FLJ41058; GLUR8; mGlu8  | 0.0276038   | 2.74282 |
| ILMN_1761968 | KIAA0363 |    | PREDICTED: Homo sapiens KIAA0363 protein (KIAA0363), mRNA.                                  |                         | 0.000443203 | 2.74273 |
| ILMN_2138765 | BTN3A3   | 6  | Homo sapiens butyrophilin, subfamily 3, member A3 (BTN3A3), transcript variant 2, mRNA.     | BTF3                    | 0.0243279   | 2.74209 |
| ILMN_1729117 | FAHD2A   | 2  | Homo sapiens fumarylacetoacetate hydrolase domain containing 2A (FAHD2A), mRNA.             | MGC131995; CGI-105      | 0.00725412  | 2.73584 |
| ILMN_1802109 | CLEC4M   | 19 | Homo sapiens C-type lectin domain family 4, member M (CLEC4M), transcript variant 6, mRNA.  | MGC129964; DCSIGNR; I   | 0.0120583   | 2.73319 |
| ILMN_2415235 | TRIM15   | 6  | Homo sapiens tripartite motif-containing 15 (TRIM15), mRNA.                                 | ZNF178; ZNFB7; RNF93    | 0.00933103  | 2.72367 |

|              |          |    |                                                                                                                                   |                          |             |         |
|--------------|----------|----|-----------------------------------------------------------------------------------------------------------------------------------|--------------------------|-------------|---------|
| ILMN_2128770 | CD74     | 5  | Homo sapiens CD74 molecule, major histocompatibility complex, class II invariant chain (CD74), transcript variant 2, mRNA.        | Ia-GAMMA; DHLAG; HLA     | 0.0337353   | 2.72262 |
| ILMN_1764571 | SLC7A6   | 16 | Homo sapiens solute carrier family 7 (cationic amino acid transporter, y+ system), member 6 (SLC7A6), transcript variant 2, mRNA. | DKFZp686K15246; KIAA     | 0.000917993 | 2.71016 |
| ILMN_1677827 | CHRD2    | 11 | Homo sapiens chordin-like 2 (CHRD2), mRNA.                                                                                        | DKFZp586N2124; CHL2;     | 0.000555632 | 2.70596 |
| ILMN_1676822 | SLC2A10  | 20 | Homo sapiens solute carrier family 2 (facilitated glucose transporter), member 10 (SLC2A10), mRNA.                                | MGC126706; ATS; GLUT1    | 0.00629137  | 2.70289 |
| ILMN_2348788 | UBASH3A  | 21 | Homo sapiens ubiquitin associated and SH3 domain containing, A (UBASH3A), transcript variant 2, mRNA.                             | TULA; CLIP4; STS-2       | 0.0040962   | 2.69983 |
| ILMN_1732151 | COX7A1   | 19 | Homo sapiens cytochrome c oxidase subunit VIIa polypeptide 1 (muscle) (COX7A1), mRNA.                                             | COX7AH; COX7A; COX7A     | 0.00765905  | 2.69935 |
| ILMN_2088437 | TSPAN4   | 11 | Homo sapiens tetraspanin 4 (TSPAN4), transcript variant 6, mRNA.                                                                  | NAG-2; NAG2; TETRASP     | 0.00074567  | 2.69731 |
| ILMN_1746465 | HSPA12A  | 10 | Homo sapiens heat shock 70kDa protein 12A (HSPA12A), mRNA.                                                                        | KIAA0417; FLJ13874       | 0.0363864   | 2.68968 |
| ILMN_1668822 | PPP1R14A | 19 | Homo sapiens protein phosphatase 1, regulatory (inhibitor) subunit 14A (PPP1R14A), mRNA.                                          | CPI-17; CPI17; PPP1INL   | 0.00619827  | 2.68938 |
| ILMN_1781285 | IRF8     | 16 | Homo sapiens interferon regulatory factor 8 (IRF8), mRNA.                                                                         | H-ICSBP; ICSBP; IRF-8; I | 0.0265523   | 2.68785 |

|              |          |    |                                                                                                             |                         |            |         |
|--------------|----------|----|-------------------------------------------------------------------------------------------------------------|-------------------------|------------|---------|
| ILMN_2400947 | MOCS2    | 5  | Homo sapiens molybdenum cofactor synthesis 2 (MOCS2), transcript variant 1, mRNA.                           | MPTS; MCBPE; MOCS2B;    | 0.0265285  | 2.68652 |
| ILMN_1682332 | PAQR8    | 6  | Homo sapiens progesterin and adiponectin receptor family member VIII (PAQR8), mRNA.                         | FLJ32521; LMPB1; FLJ462 | 0.0126777  | 2.68339 |
| ILMN_1739496 | ADARB1   | 21 | Homo sapiens adenosine deaminase, RNA-specific, B1 (RED1 homolog rat) (ADARB1), transcript variant 1, mRNA. | ADAR2a; ADAR2; DRABA    | 0.0156538  | 2.67578 |
| ILMN_2358560 | HLA-DPB1 | 6  | Homo sapiens major histocompatibility complex, class II, DP beta 1 (HLA-DPB1), mRNA.                        | HLA-DP1B; DPB1; MHC D   | 0.0491253  | 2.67028 |
| ILMN_1672662 | TPST1    | 7  | Homo sapiens tyrosylprotein sulfotransferase 1 (TPST1), mRNA.                                               |                         | 0.0289364  | 2.66202 |
| ILMN_1687768 | GNE      | 9  | Homo sapiens glucosamine (UDP-N-acetyl)-2-epimerase/N-acetylmannosamine kinase (GNE), mRNA.                 | NM; IBM2; Uae1; DMRV;   | 0.00224263 | 2.65917 |
| ILMN_1776188 | SGSM2    | 17 | Homo sapiens small G protein signaling modulator 2 (SGSM2), transcript variant 1, mRNA.                     | KIAA0397; RUTBC1; SGS   | 0.0118308  | 2.65635 |
| ILMN_1754476 | PDE1A    | 2  | Homo sapiens phosphodiesterase 1A, calmodulin-dependent (PDE1A), transcript variant 2, mRNA.                | HSPDE1A; MGC26303; H    | 0.0357286  | 2.65434 |
| ILMN_1696657 | HSD17B12 | 11 | Homo sapiens hydroxysteroid (17-beta) dehydrogenase 12 (HSD17B12), mRNA.                                    | KAR                     | 0.0027941  | 2.65224 |
| ILMN_1812618 | MFGE8    | 15 | Homo sapiens milk fat globule-EGF factor 8 protein (MFGE8), mRNA.                                           | HsT19888; BA46; OAcGD   | 3.86E-05   | 2.65034 |
| ILMN_1735038 | TLN2     | 15 | Homo sapiens talin 2 (TLN2), mRNA.                                                                          | KIAA0320; ILWEO; DKFZ   | 0.0191678  | 2.64732 |

|              |          |    |                                                                                                   |                        |            |         |
|--------------|----------|----|---------------------------------------------------------------------------------------------------|------------------------|------------|---------|
| ILMN_1774901 | HSPA2    | 14 | Homo sapiens heat shock 70kDa protein 2 (HSPA2), mRNA.                                            |                        | 0.00296981 | 2.64513 |
| ILMN_1740512 | TAGLN    | 11 | Homo sapiens transgelin (TAGLN), transcript variant 2, mRNA.                                      | TAGLN1; WS3-10; SM22;  | 0.00247149 | 2.64375 |
| ILMN_2370976 | GPR83    | 11 | Homo sapiens G protein-coupled receptor 83 (GPR83), mRNA.                                         | GPR72; GIR             | 0.00398289 | 2.64337 |
| ILMN_1773059 | PDGFD    | 11 | Homo sapiens platelet derived growth factor D (PDGFD), transcript variant 2, mRNA.                | IEGF; SCDGF-B; MSTP03; | 0.0172593  | 2.64289 |
| ILMN_1803392 | ARHGAP15 | 2  | Homo sapiens Rho GTPase activating protein 15 (ARHGAP15), mRNA.                                   | BM046                  | 0.0442094  | 2.63806 |
| ILMN_1726368 | CCDC146  | 7  | Homo sapiens coiled-coil domain containing 146 (CCDC146), mRNA.                                   | KIAA1505               | 0.00183178 | 2.63256 |
| ILMN_1654518 | SC4MOL   | 4  | Homo sapiens sterol-C4-methyl oxidase-like (SC4MOL), transcript variant 2, mRNA.                  | MGC104344; ERG25; DES  | 0.0256258  | 2.62937 |
| ILMN_1788192 | ACSS2    | 20 | Homo sapiens acyl-CoA synthetase short-chain family member 2 (ACSS2), transcript variant 2, mRNA. | AceCS; ACAS2; ACS; ACS | 0.01446    | 2.62517 |
| ILMN_1660357 | MBNL3    | X  | Homo sapiens muscleblind-like 3 (Drosophila) (MBNL3), transcript variant R, mRNA.                 | MBLX39; MBLX; FLJ11316 | 0.00854041 | 2.62257 |
| ILMN_1716803 | HSPB2    | 11 | Homo sapiens heat shock 27kDa protein 2 (HSPB2), mRNA.                                            | Hs.78846; LOH11CR1K; H | 0.0141188  | 2.61649 |
| ILMN_1791494 | RGS10    | 10 | Homo sapiens regulator of G-protein signaling 10 (RGS10), transcript variant 1, mRNA.             |                        | 0.0113724  | 2.61586 |
| ILMN_1804339 | SPON1    | 11 | Homo sapiens spondin 1, extracellular matrix protein (SPON1), mRNA.                               | KIAA0762; MGC10724; f- | 0.0070287  | 2.61583 |

|              |          |    |                                                                                                               |                           |             |         |
|--------------|----------|----|---------------------------------------------------------------------------------------------------------------|---------------------------|-------------|---------|
| ILMN_1772686 | MRPL45   | 17 | Homo sapiens mitochondrial ribosomal protein L45 (MRPL45), nuclear gene encoding mitochondrial protein, mRNA. | MGC11321                  | 0.0498559   | 2.61321 |
| ILMN_1795930 | CES7     | 16 | Homo sapiens carboxylesterase 7 (CES7), mRNA.                                                                 | FLJ31547; CES4C1; CAUX    | 0.0236743   | 2.61229 |
| ILMN_2404625 | IFI6     | 1  | Homo sapiens interferon, alpha-inducible protein 6 (IFI6), transcript variant 3, mRNA.                        | IFI-6-16; 6-16; IFI616; C | 0.0181819   | 2.61    |
| ILMN_2049766 | ABCC11   | 16 | Homo sapiens ATP-binding cassette, sub-family C (CFTR/MRP), member 11 (ABCC11), transcript variant 3, mRNA.   | MRP8                      | 0.0129333   | 2.60439 |
| ILMN_1810214 | C14orf2  | 14 | Homo sapiens chromosome 14 open reading frame 2 (C14orf2), mRNA.                                              | PLPM; MP68                | 0.0211083   | 2.5987  |
| ILMN_1701441 | PDK3     | X  | Homo sapiens pyruvate dehydrogenase kinase, isozyme 3 (PDK3), mRNA.                                           |                           | 0.0238458   | 2.5961  |
| ILMN_1796537 | ACSS2    | 20 | Homo sapiens acyl-CoA synthetase short-chain family member 2 (ACSS2), transcript variant 1, mRNA.             | AceCS; ACAS2; ACS; DKF    | 0.0348529   | 2.59565 |
| ILMN_2326512 | TBC1D10C | 11 | Homo sapiens TBC1 domain family, member 10C (TBC1D10C), mRNA.                                                 | MGC46488; FLJ00332        | 0.0115893   | 2.59407 |
| ILMN_2066066 | VIL2     | 6  | Homo sapiens villin 2 (ezrin) (VIL2), mRNA.                                                                   | MGC1584; CVL; FLJ26216    | 0.0411776   | 2.59368 |
| ILMN_1763941 | BEX2     | X  | Homo sapiens brain expressed X-linked 2 (BEX2), mRNA.                                                         | BEX1; DJ79P11.1           | 0.000974141 | 2.58706 |
| ILMN_2342066 |          |    | BX098667 NCI_CGAP_KidT1<br>Homo sapiens cDNA clone IMAGp998B025926, mRNA sequence                             |                           | 0.0293664   | 2.58586 |

|              |         |    |                                                                                                                                             |                         |             |         |
|--------------|---------|----|---------------------------------------------------------------------------------------------------------------------------------------------|-------------------------|-------------|---------|
| ILMN_1739805 | SVEP1   |    | Homo sapiens sushi, von Willebrand factor type A, EGF and pentraxin domain containing 1 (SVEP1), mRNA.                                      | FLJ16013; POLYDOM; CC   | 0.000322507 | 2.58583 |
| ILMN_1780825 | KCNN2   | 5  | Homo sapiens potassium intermediate/small conductance calcium-activated channel, subfamily N, member 2 (KCNN2), transcript variant 1, mRNA. | KCa2.2; SKCA2; SK2; hS  | 0.00898761  | 2.58578 |
| ILMN_2169439 | DHRS13  | 17 | Homo sapiens dehydrogenase/reductase (SDR family) member 13 (DHRS13), mRNA.                                                                 | MGC23280                | 0.0087191   | 2.58149 |
| ILMN_1763891 | S100A6  | 1  | Homo sapiens S100 calcium binding protein A6 (S100A6), mRNA.                                                                                | PRA; CABP; 2A9; 5B10; C | 0.00724396  | 2.57939 |
| ILMN_1795762 | IGLL3   | 22 | Homo sapiens immunoglobulin lambda-like polypeptide 3 (IGLL3), mRNA.                                                                        | 16.1                    | 0.0356746   | 2.57883 |
| ILMN_1745282 | SLC17A2 | 6  | Homo sapiens solute carrier family 17 (sodium phosphate), member 2 (SLC17A2), mRNA.                                                         | MGC138238; NPT3         | 0.0355649   | 2.57606 |
| ILMN_1686679 | GPR128  | 3  | Homo sapiens G protein-coupled receptor 128 (GPR128), mRNA.                                                                                 | MGC163260; FLJ29035; M  | 0.0344448   | 2.57177 |
| ILMN_1796712 | HLA-DMB | 6  | Homo sapiens major histocompatibility complex, class II, DM beta (HLA-DMB), mRNA.                                                           | D6S221E; RING7          | 0.0211538   | 2.56787 |
| ILMN_1795937 | CD44    | 11 | Homo sapiens CD44 molecule (Indian blood group) (CD44), transcript variant 4, mRNA.                                                         | LHR; CDW44; ECMR-III; I | 0.00607625  | 2.56473 |
| ILMN_1728677 | SAR1B   | 5  | Homo sapiens SART gene homolog B (S. cerevisiae) (SAR1B), transcript variant 1, mRNA.                                                       | CMRD; SARA2; GTBPB      | 0.0120873   | 2.56002 |
| ILMN_1768284 | NES     | 1  | Homo sapiens nestin (NES), mRNA.                                                                                                            | FLJ21841; Nbla00170     | 0.0346878   | 2.55728 |



|              |          |    |                                                                                             |                         |             |         |
|--------------|----------|----|---------------------------------------------------------------------------------------------|-------------------------|-------------|---------|
| ILMN_2370208 | GSTM2    | 1  | Homo sapiens glutathione S-transferase M2 (muscle) (GSTM2), mRNA.                           | GST4; GSTM; GSTM2-2;    | 0.000510039 | 2.55428 |
| ILMN_1723048 | ZNF135   | 19 | Homo sapiens zinc finger protein 135 (ZNF135), mRNA.                                        | ZNF61; pT3; pHZ-17; ZN  | 0.0223      | 2.55422 |
| ILMN_1748751 | AEBP1    | 7  | Homo sapiens AE binding protein 1 (AEBP1), mRNA.                                            | FLJ33612; ACLP          | 0.0144988   | 2.55392 |
| ILMN_2081087 | FANCD2   | 3  | Homo sapiens Fanconi anemia, complementation group D2 (FANCD2), transcript variant 2, mRNA. | FACD; FA-D2; FA4; FANC  | 0.0152307   | 2.55136 |
| ILMN_2095660 | TM4SF4   | 3  | Homo sapiens transmembrane 4 L six family member 4 (TM4SF4), mRNA.                          | ILTMP; il-TMP; FLJ31015 | 0.0394779   | 2.54839 |
| ILMN_1756928 | TSHZ3    | 19 | Homo sapiens teashirt zinc finger homeobox 3 (TSHZ3), mRNA.                                 | ZNF537; TSH3; KIAA1474  | 0.0223212   | 2.54758 |
| ILMN_1706261 | CPZ      | 4  | Homo sapiens carboxypeptidase Z (CPZ), transcript variant 1, mRNA.                          | MGC99682                | 0.019163    | 2.54428 |
| ILMN_2140974 | CYP1B1   | 2  | Homo sapiens cytochrome P450, family 1, subfamily B, polypeptide 1 (CYP1B1), mRNA.          | GLC3A; CP1B             | 0.0171865   | 2.5422  |
| ILMN_2132809 | BATF     | 14 | Homo sapiens basic leucine zipper transcription factor, ATF-like (BATF), mRNA.              | B-ATF; BATF1; SFA-2     | 0.00232362  | 2.54093 |
| ILMN_1770940 | TNFAIP3  | 6  | Homo sapiens tumor necrosis factor, alpha-induced protein 3 (TNFAIP3), mRNA.                | A20; MGC138687; OTUD    | 0.0087185   | 2.53523 |
| ILMN_1666392 |          |    | K-EST0216649 L17N670205n1 Homo sapiens cDNA clone L17N670205n1-10-D09 5, mRNA sequence      |                         | 0.0455814   | 2.53267 |
| ILMN_1762531 | C1orf198 | 1  | Homo sapiens chromosome 1 open reading frame 198 (C1orf198), mRNA.                          | FLJ14525; FLJ16283; DK  | 0.000877929 | 2.52812 |

|              |           |    |                                                                                                                                    |                         |            |         |
|--------------|-----------|----|------------------------------------------------------------------------------------------------------------------------------------|-------------------------|------------|---------|
| ILMN_1773963 | SERPINH1  | 11 | Homo sapiens serpin peptidase inhibitor, clade H (heat shock protein 47), member 1, (collagen binding protein 1) (SERPINH1), mRNA. | RA-A47; AsTP3; PIG14; g | 0.019896   | 2.528   |
| ILMN_1793476 | FABP5     | 8  | Homo sapiens fatty acid binding protein 5 (psoriasis-associated) (FABP5), mRNA.                                                    | PA-FABP; PAFABP; E-FAB  | 0.0406499  | 2.52682 |
| ILMN_1662731 | SLC9A4    | 2  | Homo sapiens solute carrier family 9 (sodium/hydrogen exchanger), member 4 (SLC9A4), mRNA.                                         | NHE4; DKFZp313B031      | 0.0184358  | 2.52552 |
| ILMN_2070052 | ABHD8     | 19 | Homo sapiens abhydrolase domain containing 8 (ABHD8), mRNA.                                                                        | FLJ11743; MGC14280; M   | 0.015324   | 2.51881 |
| ILMN_1775163 | KIAA1949  | 6  | Homo sapiens KIAA1949 (KIAA1949), mRNA.                                                                                            | HKMT1098                | 0.0194134  | 2.5171  |
| ILMN_1690963 | DNAJC12   | 10 | Homo sapiens DnaJ (Hsp40) homolog, subfamily C, member 12 (DNAJC12), transcript variant 1, mRNA.                                   | RP11-57G10.2; JDP1      | 0.00659293 | 2.50956 |
| ILMN_1814305 | P2RY5     | 13 | Homo sapiens purinergic receptor P2Y, G-protein coupled, 5 (P2RY5), mRNA.                                                          | MGC120358; P2Y5         | 0.00806803 | 2.50264 |
| ILMN_1824362 | LOC642197 |    | PREDICTED: Homo sapiens similar to Protein FAM82B (LOC642197), mRNA.                                                               |                         | 0.0127787  | 2.50237 |
| ILMN_1767349 | PDXK      | 21 | Homo sapiens pyridoxal (pyridoxine, vitamin B6) kinase (PDXK), mRNA.                                                               | PKH; MGC52346; FLJ319   | 0.00481662 | 2.5014  |
| ILMN_1680738 | CMIP      | 16 | Homo sapiens c-Maf-inducing protein (CMIP), transcript variant Tc-mip, mRNA.                                                       | KIAA1694                | 0.0414944  | 2.50087 |
| ILMN_1663866 | ADRA1A    | 8  | Homo sapiens adrenergic, alpha-1A-, receptor (ADRA1A), transcript variant 3, mRNA.                                                 | ADRA1C; ALPHA1AAR; AF   | 0.00170817 | 2.5001  |
| ILMN_1789558 | CRELD2    | 22 | Homo sapiens cysteine-rich with EGF-like domains 2 (CRELD2), mRNA.                                                                 | DKFZp667O055; MGC112    | 0.00740768 | 2.49955 |

|              |         |    |                                                                                                                                    |                         |             |         |
|--------------|---------|----|------------------------------------------------------------------------------------------------------------------------------------|-------------------------|-------------|---------|
| ILMN_2087702 | TMEM136 | 11 | Homo sapiens transmembrane protein 136 (TMEM136), mRNA.                                                                            | MGC17839                | 0.00427529  | 2.49919 |
| ILMN_1740493 | LEAP-2  | 5  | Homo sapiens liver-expressed antimicrobial peptide 2 (LEAP-2), mRNA.                                                               |                         | 0.0028095   | 2.49256 |
| ILMN_2313901 | GSTM1   | 1  | Homo sapiens glutathione S-transferase M1 (GSTM1), transcript variant 1, mRNA.                                                     | MGC26563; GSTM1-1; H-   | 0.00319553  | 2.48823 |
| ILMN_1774982 | MSRB3   | 12 | Homo sapiens methionine sulfoxide reductase B3 (MSRB3), transcript variant 1, mRNA.                                                | FLJ36866; DKFZp686C11   | 0.00107601  | 2.48092 |
| ILMN_2405684 | CCL5    | 17 | Homo sapiens chemokine (C-C motif) ligand 5 (CCL5), mRNA.                                                                          | TCP228; SISd; MGC1716   | 0.000844306 | 2.47865 |
| ILMN_1807972 | SRC     | 20 | Homo sapiens v-src sarcoma (Schmidt-Ruppin A-2) viral oncogene homolog (avian) (SRC), transcript variant 2, mRNA.                  | SRC1; p60-Src; c-SRC; A | 0.00450023  | 2.47829 |
| ILMN_1744604 | FBLN1   | 22 | Homo sapiens fibulin 1 (FBLN1), transcript variant C, mRNA.                                                                        | FBLN                    | 0.0476947   | 2.47788 |
| ILMN_1796762 | STAT3   | 17 | Homo sapiens signal transducer and activator of transcription 3 (acute-phase response factor) (STAT3), transcript variant 1, mRNA. | APRF; FLJ20882; MGC160  | 0.00545168  | 2.47753 |
| ILMN_1807359 | CLIC5   | 6  | Homo sapiens chloride intracellular channel 5 (CLIC5), mRNA.                                                                       | MST130; MSTP130; FLJ90  | 0.0237916   | 2.47324 |
| ILMN_2073446 | TUG1    | 22 | Homo sapiens taurine upregulated gene 1 (TUG1) on chromosome 22.                                                                   | MGC46067; FLJ20618      | 0.04409     | 2.47203 |
| ILMN_1780861 | SC4MOL  | 4  | Homo sapiens sterol-C4-methyl oxidase-like (SC4MOL), transcript variant 1, mRNA.                                                   | MGC104344; ERG25; DES   | 0.0218345   | 2.47122 |

|              |           |   |                                                                                                                                                                |                          |           |         |
|--------------|-----------|---|----------------------------------------------------------------------------------------------------------------------------------------------------------------|--------------------------|-----------|---------|
| ILMN_1668559 | LOC650215 |   | PREDICTED: Homo sapiens similar to Exportin-T (tRNA exportin) (Exportin(tRNA)) (LOC650215), mRNA.                                                              |                          | 0.0256843 | 2.46951 |
| ILMN_1654778 | MMACHC    | 1 | Homo sapiens methylmalonic aciduria (cobalamin deficiency) cbIC type, with homocystinuria (MMACHC), mRNA.                                                      | RP11-291L19.3; FLJ2567   | 0.0043004 | 2.46873 |
| ILMN_1782922 | NLRP3     | 1 | Homo sapiens NLR family, pyrin domain containing 3 (NLRP3), transcript variant 3, mRNA.                                                                        | AII/AVP; AGTAVPRL; PYP   | 0.0461373 | 2.46794 |
| ILMN_1674874 | SLC9A1    | 1 | Homo sapiens solute carrier family 9 (sodium/hydrogen exchanger), member 1 (antiporter, Na <sup>+</sup> /H <sup>+</sup> , amiloride sensitive) (SLC9A1), mRNA. | APNH; FLJ42224; NHE1     | 0.0174173 | 2.46482 |
| ILMN_1801307 | GUCY1A3   | 4 | Homo sapiens guanylate cyclase 1, soluble, alpha 3 (GUCY1A3), mRNA.                                                                                            | GUCA3; GC-SA3; GUC1A3    | 0.0331712 | 2.46344 |
| ILMN_2338348 | PNKD      | 2 | Homo sapiens paroxysmal nonkinesigenic dyskinesia (PNKD), transcript variant 2, mRNA.                                                                          | FKSG19; KIPP1184; DKF2   | 0.0178641 | 2.46315 |
| ILMN_1792455 | CCNI      | 4 | Homo sapiens cyclin I (CCNI), mRNA.                                                                                                                            | CYC1; CYI                | 0.0275032 | 2.45688 |
| ILMN_2295518 | SP110     | 2 | Homo sapiens SP110 nuclear body protein (SP110), transcript variant b, mRNA.                                                                                   | FLJ22835; IFI75; VODI; I | 0.0108666 | 2.45543 |
| ILMN_1668039 | CREB5     | 7 | Homo sapiens cAMP responsive element binding protein 5 (CREB5), transcript variant 4, mRNA.                                                                    | CRE-BPA                  | 0.011207  | 2.45186 |
| ILMN_1701933 | DARC      | 1 | Homo sapiens Duffy blood group, chemokine receptor (DARC), transcript variant 2, mRNA.                                                                         | FY; Dfy; WBCQ1; CCBP1;   | 0.0100875 | 2.44421 |

|              |         |    |                                                                                                      |                         |            |         |
|--------------|---------|----|------------------------------------------------------------------------------------------------------|-------------------------|------------|---------|
| ILMN_1656111 | MUC1    | 1  | Homo sapiens mucin 1, cell surface associated (MUC1), transcript variant 6, mRNA.                    | PEMT; PUM; PEM; EMA; H  | 0.00952959 | 2.44238 |
| ILMN_1653180 | NAMPT   | 7  | Homo sapiens nicotinamide phosphoribosyltransferase (NAMPT), mRNA.                                   | DKFZP666B131; PBEF; 1   | 0.00467347 | 2.44112 |
| ILMN_2075189 | CLEC10A | 17 | Homo sapiens C-type lectin domain family 10, member A (CLEC10A), transcript variant 2, mRNA.         | HML; CD301; HML2; CLEC  | 0.00365733 | 2.43481 |
| ILMN_1748907 | CSNK1E  | 22 | Homo sapiens casein kinase 1, epsilon (CSNK1E), transcript variant 1, mRNA.                          | HCKIE; MGC10398         | 0.0108492  | 2.43418 |
| ILMN_2355831 | HCP5    | 6  | Homo sapiens HLA complex P5 (HCP5), mRNA.                                                            | P5-1; D6S2650E          | 0.0342074  | 2.42997 |
| ILMN_1757845 | LAMC3   | 9  | Homo sapiens laminin, gamma 3 (LAMC3), mRNA.                                                         | DKFZp434E202            | 0.0051931  | 2.42869 |
| ILMN_1778964 | SWAP70  | 11 | Homo sapiens SWAP-70 protein (SWAP70), mRNA.                                                         | HSPC321; FLJ39540; KIA  | 0.00861114 | 2.42731 |
| ILMN_2077952 | CYBRD1  | 2  | Homo sapiens cytochrome b reductase 1 (CYBRD1), mRNA.                                                | FLJ23462; FRRS3; DCYTE  | 0.0475955  | 2.42456 |
| ILMN_1792072 | CD44    | 11 | Homo sapiens CD44 molecule (Indian blood group) (CD44), transcript variant 5, mRNA.                  | LHR; CDW44; ECMR-III; I | 0.027525   | 2.41899 |
| ILMN_2402600 | SAMD3   | 6  | Homo sapiens sterile alpha motif domain containing 3 (SAMD3), transcript variant 1, mRNA.            | MGC35163; FLJ34563      | 0.048321   | 2.41641 |
| ILMN_1751028 | EEF1B2  | 2  | Homo sapiens eukaryotic translation elongation factor 1 beta 2 (EEF1B2), transcript variant 2, mRNA. | EEF1B; EF1B; EEF1B1     | 0.00776971 | 2.41188 |

|              |        |    |                                                                                                                                                                                                      |                       |             |         |
|--------------|--------|----|------------------------------------------------------------------------------------------------------------------------------------------------------------------------------------------------------|-----------------------|-------------|---------|
| ILMN_1815346 | MTHFD2 | 2  | Homo sapiens methylenetetrahydrofolate dehydrogenase (NADP+ dependent) 2, methenyltetrahydrofolate cyclohydrolase (MTHFD2), nuclear gene encoding mitochondrial protein, transcript variant 1, mRNA. | NMDMC                 | 0.0199047   | 2.41104 |
| ILMN_1657398 | ATL3   | 11 | Homo sapiens atlastin 3 (ATL3), mRNA.                                                                                                                                                                | ATL3; DKFZp564J0863   | 0.0405896   | 2.41039 |
| ILMN_1814077 | SGK2   | 20 | Homo sapiens serum/glucocorticoid regulated kinase 2 (SGK2), transcript variant 1, mRNA.                                                                                                             | H-SGK2; dJ138B7.2     | 0.0195467   | 2.41036 |
| ILMN_1655418 |        |    | oj08g11.y1 Human lacrimal gland, unamplified: oj Homo sapiens cDNA clone oj08g11 5, mRNA sequence                                                                                                    |                       | 0.0383652   | 2.40975 |
| ILMN_1745397 | PDE4B  | 1  | Homo sapiens phosphodiesterase 4B, cAMP-specific (phosphodiesterase E4 dunce homolog, Drosophila) (PDE4B), transcript variant a, mRNA.                                                               | DKFZp686F2182; MGC12  | 0.0385426   | 2.40909 |
| ILMN_2413508 | RNASE3 | 14 | Homo sapiens ribonuclease, RNase A family, 3 (eosinophil cationic protein) (RNASE3), mRNA.                                                                                                           | RNS3; ECP             | 0.000691944 | 2.40653 |
| ILMN_1680774 | PDGFRB | 5  | Homo sapiens platelet-derived growth factor receptor, beta polypeptide (PDGFRB), mRNA.                                                                                                               | PDGFR; JTK12; CD140B; | 0.00176177  | 2.40394 |
| ILMN_1678928 | GYG2   | X  | Homo sapiens glycogenin 2 (GYG2), mRNA.                                                                                                                                                              | GN-2; GN2             | 0.00965651  | 2.4012  |
| ILMN_2373831 | ZNF14  | 19 | Homo sapiens zinc finger protein 14 (ZNF14), mRNA.                                                                                                                                                   | GIOT-4; KOX6          | 0.0108226   | 2.40089 |
| ILMN_1917341 | VCAN   | 5  | Homo sapiens versican (VCAN), mRNA.                                                                                                                                                                  | DKFZp686K06110; WGN;  | 0.012986    | 2.40079 |

|              |          |    |                                                                                                                              |                        |            |         |
|--------------|----------|----|------------------------------------------------------------------------------------------------------------------------------|------------------------|------------|---------|
| ILMN_2325347 | HSD17B14 | 19 | Homo sapiens hydroxysteroid (17-beta) dehydrogenase 14 (HSD17B14), mRNA.                                                     | DHRS10; retSDR3        | 0.00393008 | 2.40046 |
| ILMN_2306540 | PDE7A    | 8  | Homo sapiens phosphodiesterase 7A (PDE7A), transcript variant 2, mRNA.                                                       | HCP1; PDE7             | 0.0141675  | 2.39713 |
| ILMN_1712026 | SLC2A12  | 6  | Homo sapiens solute carrier family 2 (facilitated glucose transporter), member 12 (SLC2A12), mRNA.                           | GLUT12; GLUT8          | 0.00512111 | 2.39646 |
| ILMN_2326509 | SAMD3    | 6  | Homo sapiens sterile alpha motif domain containing 3 (SAMD3), transcript variant 1, mRNA.                                    | MGC35163; FLJ34563     | 0.0185066  | 2.39549 |
| ILMN_1810852 | UCP2     | 11 | Homo sapiens uncoupling protein 2 (mitochondrial, proton carrier) (UCP2), nuclear gene encoding mitochondrial protein, mRNA. | SLC25A8; UCPH          | 0.0156855  | 2.39237 |
| ILMN_1666594 | STARD5   | 15 | Homo sapiens StAR-related lipid transfer (START) domain containing 5 (STARD5), mRNA.                                         | MGC10327               | 0.0426748  | 2.39188 |
| ILMN_1730612 | ENO2     | 12 | Homo sapiens enolase 2 (gamma, neuronal) (ENO2), mRNA.                                                                       | NSE                    | 0.0419129  | 2.38898 |
| ILMN_1803423 | LRCH4    | 7  | Homo sapiens leucine-rich repeats and calponin homology (CH) domain containing 4 (LRCH4), mRNA.                              | LRRN1; PP14183; SAP25; | 0.0285742  | 2.38651 |
| ILMN_1671149 | CD248    | 11 | Homo sapiens CD248 molecule, endosialin (CD248), mRNA.                                                                       | MGC119478; CD164L1; T  | 0.0274709  | 2.38524 |
| ILMN_1667692 | TMEM126A | 11 | Homo sapiens transmembrane protein 126A (TMEM126A), mRNA.                                                                    | DKFZp586C1924          | 0.0192787  | 2.38209 |
| ILMN_1795429 | TDO2     | 4  | Homo sapiens tryptophan 2,3-dioxygenase (TDO2), mRNA.                                                                        | TRPO; TDO; TPH2        | 0.00171762 | 2.38134 |

|              |           |    |                                                                                                                                              |                        |             |         |
|--------------|-----------|----|----------------------------------------------------------------------------------------------------------------------------------------------|------------------------|-------------|---------|
| ILMN_1802646 | GYPC      | 2  | Homo sapiens glycophorin C (Gerbich blood group) (GYPC), transcript variant 2, mRNA.                                                         | MGC126191; GE; CD236F  | 0.0162817   | 2.38101 |
| ILMN_1800425 | CKMT2     | 5  | Homo sapiens creatine kinase, mitochondrial 2 (sarcomeric) (CKMT2), nuclear gene encoding mitochondrial protein, transcript variant 1, mRNA. | SMTCK                  | 0.0020058   | 2.37942 |
| ILMN_1682929 | MGC42367  | 2  | Homo sapiens similar to 2010300C02Rik protein (MGC42367), mRNA.                                                                              |                        | 0.0269208   | 2.37632 |
| ILMN_2383611 | FMO1      | 1  | Homo sapiens flavin containing monooxygenase 1 (FMO1), mRNA.                                                                                 |                        | 0.00100163  | 2.37463 |
| ILMN_1789599 | CLEC5A    | 7  | Homo sapiens C-type lectin domain family 5, member A (CLEC5A), mRNA.                                                                         | MDL1; MGC138304; CLEC  | 0.00735065  | 2.37395 |
| ILMN_1696048 | CTTN      | 11 | Homo sapiens cortactin (CTTN), transcript variant 1, mRNA.                                                                                   | EMS1; FLJ34459         | 0.0104275   | 2.37308 |
| ILMN_1724181 | MOCOS     | 18 | Homo sapiens molybdenum cofactor sulfurase (MOCOS), mRNA.                                                                                    | MOS; FLJ20733; HMCS    | 0.0181139   | 2.36639 |
| ILMN_1675024 | VKORC1L1  | 7  | Homo sapiens vitamin K epoxide reductase complex, subunit 1-like 1 (VKORC1L1), mRNA.                                                         | DKFZp762H0113          | 5.39E-05    | 2.3647  |
| ILMN_2104295 | QPRT      | 16 | Homo sapiens quinolinate phosphoribosyltransferase (nicotinate-nucleotide pyrophosphorylase (carboxylating)) (QPRT), mRNA.                   | QPRTase                | 0.0291336   | 2.36291 |
| ILMN_1724066 | CNTNAP1   | 17 | Homo sapiens contactin associated protein 1 (CNTNAP1), mRNA.                                                                                 | P190; NRXN4; CNTNAP; C | 0.000832739 | 2.36004 |
| ILMN_1656868 | C20orf127 | 20 | Homo sapiens chromosome 20 open reading frame 127 (C20orf127), mRNA.                                                                         | dJ614O4.6; MGC118948   | 0.031861    | 2.35948 |



|              |          |    |                                                                                                                                        |                         |            |         |
|--------------|----------|----|----------------------------------------------------------------------------------------------------------------------------------------|-------------------------|------------|---------|
| ILMN_1658847 | MT1X     | 16 | Homo sapiens metallothionein 1X (MT1X), mRNA.                                                                                          | MT1; MT-1I              | 0.0207393  | 2.35877 |
| ILMN_1668592 | ASB13    | 10 | Homo sapiens ankyrin repeat and SOCS box-containing 13 (ASB13), mRNA.                                                                  | FLJ13134; MGC19879      | 0.0340066  | 2.35861 |
| ILMN_1847130 | COL12A1  | 6  | Homo sapiens collagen, type XII, alpha 1 (COL12A1), transcript variant short, mRNA.                                                    | BA209D8.1; DJ234P15.1;  | 0.0338814  | 2.35858 |
| ILMN_1711439 | KLF6     | 10 | Homo sapiens Kruppel-like factor 6 (KLF6), transcript variant 2, mRNA.                                                                 | GBF; ZF9; ST12; CPBP; E | 0.00572723 | 2.35702 |
| ILMN_1814998 | CLU      | 8  | Homo sapiens clusterin (CLU), transcript variant 2, mRNA.                                                                              | SP-40; MGC24903; CLI; A | 0.0130913  | 2.35675 |
| ILMN_1760778 | MGC13057 | 2  | Homo sapiens hypothetical protein MGC13057 (MGC13057), mRNA.                                                                           |                         | 0.00897793 | 2.35666 |
| ILMN_1675191 | ZSCAN18  | 19 | Homo sapiens zinc finger and SCAN domain containing 18 (ZSCAN18), mRNA.                                                                | ZNF447; DKFZp586B112    | 0.00442088 | 2.35328 |
| ILMN_2188722 | EBPL     | 13 | Homo sapiens emopamil binding protein-like (EBPL), mRNA.                                                                               | EBRP; RP11-432M24.2     | 0.0083961  | 2.35247 |
| ILMN_1776121 | SLFN11   | 17 | Homo sapiens schlafen family member 11 (SLFN11), mRNA.                                                                                 | FLJ34922; SLFN8/9       | 0.00751504 | 2.34985 |
| ILMN_1713829 | HIPK2    | 7  | Homo sapiens homeodomain interacting protein kinase 2 (HIPK2), mRNA.                                                                   | PRO0593                 | 0.0319339  | 2.34927 |
| ILMN_1726392 | RERG     | 12 | Homo sapiens RAS-like, estrogen-regulated, growth inhibitor (RERG), mRNA.                                                              | MGC15754                | 0.00372176 | 2.34895 |
| ILMN_1903914 | PDE4B    | 1  | Homo sapiens phosphodiesterase 4B, cAMP-specific (phosphodiesterase E4 dunce homolog, Drosophila) (PDE4B), transcript variant a, mRNA. | DKFZp686F2182; MGC12    | 0.0147984  | 2.34659 |

|              |           |    |                                                                                                           |                          |             |         |
|--------------|-----------|----|-----------------------------------------------------------------------------------------------------------|--------------------------|-------------|---------|
| ILMN_1740490 | GABBR1    | 6  | Homo sapiens gamma-aminobutyric acid (GABA) B receptor, 1 (GABBR1), transcript variant 4, mRNA.           | dJ271M21.1.1; dJ271M21   | 0.000730172 | 2.34123 |
| ILMN_2175912 | MEF2C     | 5  | Homo sapiens myocyte enhancer factor 2C (MEF2C), mRNA.                                                    |                          | 0.0214134   | 2.33974 |
| ILMN_1792256 | NCK2      | 2  | Homo sapiens NCK adaptor protein 2 (NCK2), transcript variant 2, mRNA.                                    | NCKbeta; GRB4            | 0.0267312   | 2.3366  |
| ILMN_1765446 | LOC653158 | 5  | PREDICTED: Homo sapiens similar to hypothetical protein MGC40405, transcript variant 1 (LOC653158), mRNA. |                          | 0.0080671   | 2.33608 |
| ILMN_2382990 | USH2A     | 1  | Homo sapiens Usher syndrome 2A (autosomal recessive, mild) (USH2A), transcript variant 2, mRNA.           | dJ1111A8.1; US2; USH2;   | 0.0149031   | 2.33382 |
| ILMN_1680453 | CSDA      | 12 | Homo sapiens cold shock domain protein A (CSDA), mRNA.                                                    | CSDA1; DBPA; ZONAB       | 0.0218482   | 2.33102 |
| ILMN_1738992 | DHCR24    | 1  | Homo sapiens 24-dehydrocholesterol reductase (DHCR24), mRNA.                                              | Nbla03646; seladin-1; SE | 0.0169504   | 2.32803 |
| ILMN_1780465 | NBL1      | 1  | Homo sapiens neuroblastoma, suppression of tumorigenicity 1 (NBL1), transcript variant 1, mRNA.           | D1S1733E; NO3; DAND1     | 0.00758088  | 2.32723 |
| ILMN_1720124 | GPAM      | 10 | Homo sapiens glycerol-3-phosphate acyltransferase, mitochondrial (GPAM), mRNA.                            | GPAT1; MGC26846; KIAA    | 0.00489151  | 2.32576 |
| ILMN_2203950 | KHK       | 2  | Homo sapiens ketohexokinase (fructokinase) (KHK), transcript variant a, mRNA.                             |                          | 0.00183071  | 2.32521 |
| ILMN_2253732 | LOC728358 | 8  | Homo sapiens defensin, alpha 1 (LOC728358), mRNA.                                                         |                          | 0.000652375 | 2.32474 |
| ILMN_1672611 | GALK2     | 15 | Homo sapiens galactokinase 2 (GALK2), transcript variant 1, mRNA.                                         | GK2; MGC1745             | 0.00639486  | 2.32268 |

|              |         |    |                                                                                                 |                        |             |         |
|--------------|---------|----|-------------------------------------------------------------------------------------------------|------------------------|-------------|---------|
| ILMN_1692295 | P2RY2   | 11 | Homo sapiens purinergic receptor P2Y, G-protein coupled, 2 (P2RY2), transcript variant 2, mRNA. | P2Y2R; P2Y2; P2U; MGC4 | 0.0101455   | 2.32157 |
| ILMN_1669376 | SULT1B1 | 4  | Homo sapiens sulfotransferase family, cytosolic, 1B, member 1 (SULT1B1), mRNA.                  | ST1B2; MGC13356; SULT  | 0.00107258  | 2.32036 |
| ILMN_1811636 | ADFP    | 9  | Homo sapiens adipose differentiation-related protein (ADFP), mRNA.                              | ADRP; MGC10598         | 0.00100549  | 2.31792 |
| ILMN_2317923 | FYB     | 5  | Homo sapiens FYN binding protein (FYB-120/130) (FYB), transcript variant 1, mRNA.               | PRO0823; SLAP-130; AD  | 0.0399301   | 2.31552 |
| ILMN_1685580 | COL6A3  | 2  | Homo sapiens collagen, type VI, alpha 3 (COL6A3), transcript variant 3, mRNA.                   | DKFZp686K04147; FLJ34  | 0.0197641   | 2.31401 |
| ILMN_2366634 | THOP1   | 19 | Homo sapiens thimet oligopeptidase 1 (THOP1), mRNA.                                             | MEPD_HUMAN; MP78; EP   | 0.00282974  | 2.31154 |
| ILMN_1705258 | SPARCL1 | 4  | Homo sapiens SPARC-like 1 (mast9, hevin) (SPARCL1), mRNA.                                       | PIG33; SC1             | 0.00492703  | 2.30777 |
| ILMN_1831106 | ZNF827  | 4  | Homo sapiens zinc finger protein 827 (ZNF827), mRNA.                                            |                        | 0.00168875  | 2.30658 |
| ILMN_1778755 | WDR54   | 2  | Homo sapiens WD repeat domain 54 (WDR54), mRNA.                                                 | FLJ12953               | 0.0179644   | 2.3033  |
| ILMN_1807969 | ZBTB4   | 17 | Homo sapiens zinc finger and BTB domain containing 4 (ZBTB4), mRNA.                             | KAISO-L1; KIAA1538     | 0.000968637 | 2.29834 |
| ILMN_1654946 | KCNK5   | 6  | Homo sapiens potassium channel, subfamily K, member 5 (KCNK5), mRNA.                            | FLJ11035; K2p5.1; TASK | 0.0107646   | 2.29731 |
| ILMN_1799725 |         |    | 6025725T9FT NIH_MGC_77<br>Homo sapiens cDNA clone IMAGE:4700548 5, mRNA sequence                |                        | 0.0376568   | 2.29671 |
| ILMN_2307032 | PIK3IP1 | 22 | Homo sapiens phosphoinositide-3-kinase interacting protein 1 (PIK3IP1), mRNA.                   | HGFL; hHGFL(S); MGC17  | 0.0264015   | 2.29669 |

|              |        |    |                                                                                                                        |                            |            |         |
|--------------|--------|----|------------------------------------------------------------------------------------------------------------------------|----------------------------|------------|---------|
| ILMN_1759628 | TMEM43 | 3  | Homo sapiens transmembrane protein 43 (TMEM43), mRNA.                                                                  | DKFZp586G1919; MGC32       | 0.016604   | 2.29595 |
| ILMN_1732967 | CFI    | 4  | Homo sapiens complement factor I (CFI), mRNA.                                                                          | IF; KAF; FI; factor I; C3b | 0.0119427  | 2.29554 |
| ILMN_1689251 | ANTXR1 | 2  | Homo sapiens anthrax toxin receptor 1 (ANTXR1), transcript variant 1, mRNA.                                            | ATR; FLJ21776; FLJ11298    | 0.00056275 | 2.295   |
| ILMN_2195482 | NGEF   | 2  | Homo sapiens neuronal guanine nucleotide exchange factor (NGEF), mRNA.                                                 | EPHEXIN                    | 0.00422767 | 2.29497 |
| ILMN_1654396 | ABCC9  | 12 | Homo sapiens ATP-binding cassette, sub-family C (CFTR/MRP), member 9 (ABCC9), transcript variant SUR2A-delta-14, mRNA. | ABC37; FLJ36852; SUR2;     | 0.0370543  | 2.29493 |
| ILMN_1680070 | CTTN   | 11 | Homo sapiens cortactin (CTTN), transcript variant 2, mRNA.                                                             | EMS1; FLJ34459             | 0.024683   | 2.2949  |
| ILMN_1760027 | SYTL2  | 11 | Homo sapiens synaptotagmin-like 2 (SYTL2), transcript variant e, mRNA.                                                 | MGC102768; CHR11SYT;       | 0.0469287  | 2.29218 |
| ILMN_2057981 | LIPC   | 15 | Homo sapiens lipase, hepatic (LIPC), mRNA.                                                                             | LIPH; HL; HTGL             | 0.00126934 | 2.29059 |
| ILMN_1753112 | ID3    | 1  | Homo sapiens inhibitor of DNA binding 3, dominant negative helix-loop-helix protein (ID3), mRNA.                       | HEIR-1                     | 0.00977273 | 2.28926 |
| ILMN_1658677 | GPHN   | 14 | Homo sapiens gephyrin (GPHN), transcript variant 2, mRNA.                                                              | GPHRYN; GPH; GEPH; KIA     | 0.0170707  | 2.28602 |
| ILMN_1682818 | OSBPL3 | 7  | Homo sapiens oxysterol binding protein-like 3 (OSBPL3), transcript variant 4, mRNA.                                    | MGC21526; DKFZp667P1       | 0.0253895  | 2.28409 |
| ILMN_2351638 | LAMP3  | 3  | Homo sapiens lysosomal-associated membrane protein 3 (LAMP3), mRNA.                                                    | TSC403; DC-LAMP; CD20      | 0.0366684  | 2.28168 |

|              |           |    |                                                                                                                                |                        |            |         |
|--------------|-----------|----|--------------------------------------------------------------------------------------------------------------------------------|------------------------|------------|---------|
| ILMN_1672878 | CHCHD8    | 11 | Homo sapiens coiled-coil-helix-coiled-coil-helix domain containing 8 (CHCHD8), mRNA.                                           | DKFZp762H1711; E2IG2;  | 0.0087062  | 2.27906 |
| ILMN_1684401 | LOC642755 | 15 | PREDICTED: Homo sapiens similar to DEXI, transcript variant 1 (LOC642755), mRNA.                                               |                        | 0.0391681  | 2.27754 |
| ILMN_1710092 | ITPR3     | 6  | Homo sapiens inositol 1,4,5-triphosphate receptor, type 3 (ITPR3), mRNA.                                                       | FLJ36205; IP3R; IP3R3  | 0.00085123 | 2.27552 |
| ILMN_1681886 | HRG       | 3  | Homo sapiens histidine-rich glycoprotein (HRG), mRNA.                                                                          | HRGP; DKFZp779H1622;   | 0.00046123 | 2.27071 |
| ILMN_1694213 | LOXL4     | 10 | Homo sapiens lysyl oxidase-like 4 (LOXL4), mRNA.                                                                               | FLJ21889; LOXC         | 0.00279443 | 2.26645 |
| ILMN_1738773 | ITM2C     | 2  | Homo sapiens integral membrane protein 2C (ITM2C), transcript variant 2, mRNA.                                                 | E25; ITM3; BRI3; E25C; | 0.0138005  | 2.26508 |
| ILMN_1657554 | DEXI      | 16 | Homo sapiens dexamethasone-induced transcript (DEXI), mRNA.                                                                    | MYLE                   | 0.0100067  | 2.26346 |
| ILMN_2095273 | LOC653600 | 8  | PREDICTED: Homo sapiens similar to Neutrophil defensin 1 precursor (HNP-1) (HP-1) (HP1) (Defensin, alpha 1) (LOC653600), mRNA. |                        | 0.0011609  | 2.26279 |
| ILMN_2116299 | SMOC2     | 6  | Homo sapiens SPARC related modular calcium binding 2 (SMOC2), mRNA.                                                            | dJ421D16.1; MSTP140; b | 0.0218412  | 2.2627  |
| ILMN_1698934 | FBLN1     | 22 | Homo sapiens fibulin 1 (FBLN1), transcript variant A, mRNA.                                                                    | FBLN                   | 0.0475103  | 2.2612  |
| ILMN_1659490 | CENTD3    | 5  | Homo sapiens centaurin, delta 3 (CENTD3), mRNA.                                                                                | FLJ21065; ARAP3; DRAG  | 0.0123584  | 2.26009 |
| ILMN_1765796 | ZSWIM4    | 19 | Homo sapiens zinc finger, SWIM-type containing 4 (ZSWIM4), mRNA.                                                               |                        | 0.00303645 | 2.25632 |
| ILMN_1810486 | RPL29     | 3  | Homo sapiens ribosomal protein L29 (RPL29), mRNA.                                                                              | HUMRPL29; MGC88589; H  | 0.00092964 | 2.25547 |

|              |         |    |                                                                                                                |                        |             |         |
|--------------|---------|----|----------------------------------------------------------------------------------------------------------------|------------------------|-------------|---------|
| ILMN_1727577 | VCL     | 10 | Homo sapiens vinculin (VCL), transcript variant 1, mRNA.                                                       | MVCL                   | 0.000761061 | 2.2506  |
| ILMN_1741200 | CRP     | 1  | Homo sapiens C-reactive protein, pentraxin-related (CRP), mRNA.                                                | MGC149895; PTX1; MGC8  | 5.86E-05    | 2.2459  |
| ILMN_2410145 | STAT1   | 2  | Homo sapiens signal transducer and activator of transcription 1, 91kDa (STAT1), transcript variant beta, mRNA. | ISGF-3; STAT91; DKFZp6 | 0.0181059   | 2.24539 |
| ILMN_1689378 | TPM2    | 9  | Homo sapiens tropomyosin 2 (beta) (TPM2), transcript variant 2, mRNA.                                          | AMCD1; TMSB; DA1       | 0.0460804   | 2.2453  |
| ILMN_1803367 | TBC1D16 | 17 | Homo sapiens TBC1 domain family, member 16 (TBC1D16), mRNA.                                                    | FLJ20748; MGC25062     | 0.0132404   | 2.24291 |
| ILMN_2381197 | TSPAN13 | 7  | Homo sapiens tetraspanin 13 (TSPAN13), mRNA.                                                                   | FLJ22934; NET-6; TM4SF | 0.00849826  | 2.24242 |
| ILMN_1742981 | HBG1    | 11 | Homo sapiens hemoglobin, gamma A (HBG1), mRNA.                                                                 | HBGR; HSGGL1; HBGA; P  | 0.0155566   | 2.24236 |
| ILMN_1764729 | FRMD6   | 14 | Homo sapiens FERM domain containing 6 (FRMD6), mRNA.                                                           | c14_5320; MGC17921; C  | 0.0373737   | 2.24088 |
| ILMN_1742332 | MXRA7   | 17 | Homo sapiens matrix-remodelling associated 7 (MXRA7), transcript variant 1, mRNA.                              | FLJ46603; TMAP1; PS1TP | 0.0152472   | 2.23933 |
| ILMN_1694426 | DHODH   | 16 | Homo sapiens dihydroorotate dehydrogenase (DHODH), nuclear gene encoding mitochondrial protein, mRNA.          | DHOdehase              | 0.000145601 | 2.23888 |
| ILMN_1788053 | PLEKHO1 | 1  | Homo sapiens pleckstrin homology domain containing, family O member 1 (PLEKHO1), mRNA.                         | CKIP-1; OC120; RP11-45 | 0.00129529  | 2.23691 |
| ILMN_1661875 | ZHX3    | 20 | Homo sapiens zinc fingers and homeoboxes 3 (ZHX3), mRNA.                                                       | KIAA0395; TIX1         | 0.0473921   | 2.23125 |
| ILMN_1705231 | ADCY3   | 2  | Homo sapiens adenylate cyclase 3 (ADCY3), mRNA.                                                                | KIAA0511; AC3          | 0.0235138   | 2.22966 |

|              |           |    |                                                                                                                                |                       |            |         |
|--------------|-----------|----|--------------------------------------------------------------------------------------------------------------------------------|-----------------------|------------|---------|
| ILMN_1677432 | C19orf59  | 19 | Homo sapiens chromosome 19 open reading frame 59 (C19orf59), mRNA.                                                             | MGC132456; MCEMP1     | 0.00280076 | 2.2295  |
| ILMN_1855278 | C7orf23   | 7  | Homo sapiens chromosome 7 open reading frame 23 (C7orf23), mRNA.                                                               | MM-TRAG; MGC4175      | 0.0481675  | 2.22871 |
| ILMN_1715748 | C8orf70   | 8  | Homo sapiens chromosome 8 open reading frame 70 (C8orf70), mRNA.                                                               | CGI-62                | 0.00332512 | 2.22646 |
| ILMN_2393712 | CDKN2AIPN | 5  | Homo sapiens CDKN2A interacting protein N-terminal like (CDKN2AIPNL), mRNA.                                                    | MGC13017              | 0.00348373 | 2.2263  |
| ILMN_1811890 | TMEM156   | 4  | Homo sapiens transmembrane protein 156 (TMEM156), mRNA.                                                                        | FLJ23235              | 0.0278262  | 2.22333 |
| ILMN_1691539 | ABAT      | 16 | Homo sapiens 4-aminobutyrate aminotransferase (ABAT), nuclear gene encoding mitochondrial protein, transcript variant 1, mRNA. | NPD009; GABAT; GABA-A | 0.0369793  | 2.22028 |
| ILMN_1729987 | DRAM      | 12 | Homo sapiens damage-regulated autophagy modulator (DRAM), mRNA.                                                                | FLJ11259              | 0.0193039  | 2.21821 |
| ILMN_1801928 | NUDT2     | 9  | Homo sapiens nudix (nucleoside diphosphate linked moiety X)-type motif 2 (NUDT2), transcript variant 3, mRNA.                  | APAH1; MGC10404       | 0.00759779 | 2.21537 |
| ILMN_1815745 | OLR1      | 12 | Homo sapiens oxidized low density lipoprotein (lectin-like) receptor 1 (OLR1), mRNA.                                           | SCARE1; LOX1; CLEC8A  | 0.00984225 | 2.21279 |
| ILMN_1763704 | TMEM119   | 12 | Homo sapiens transmembrane protein 119 (TMEM119), mRNA.                                                                        |                       | 0.0303565  | 2.21231 |

|              |         |    |                                                                                                                  |                         |            |         |
|--------------|---------|----|------------------------------------------------------------------------------------------------------------------|-------------------------|------------|---------|
| ILMN_1796629 |         |    | BX118953<br>Soares_pregnant_uterus_NbHPU<br>Homo sapiens cDNA clone<br>IMAGp998K024347, mRNA<br>sequence         |                         | 0.00558734 | 2.21055 |
| ILMN_2161357 | GSTM4   | 1  | Homo sapiens glutathione S-<br>transferase M4 (GSTM4),<br>transcript variant 1, mRNA.                            | GSTM4-4; MGC131945; M   | 0.0271133  | 2.20675 |
| ILMN_1709348 | EGFLAM  | 5  | Homo sapiens EGF-like,<br>fibronectin type III and laminin<br>G domains (EGFLAM), transcript<br>variant 4, mRNA. | AGRINL; AGRNL; FLJ3915  | 0.0193378  | 2.20628 |
| ILMN_1751079 | RCC2    | 1  | Homo sapiens regulator of<br>chromosome condensation 2<br>(RCC2), mRNA.                                          | DKFZp762N0610; KIAA14   | 0.0347433  | 2.20363 |
| ILMN_2059452 | NCF1    | 7  | Homo sapiens neutrophil<br>cytosolic factor 1, (chronic<br>granulomatous disease,<br>autosomal 1) (NCF1), mRNA.  | NOXO2; SH3PXD1A; NCF    | 0.00887014 | 2.20174 |
| ILMN_1770824 | EMILIN2 | 18 | Homo sapiens elastin microfibril<br>interfacer 2 (EMILIN2), mRNA.                                                | FLJ33200; FOAP-10; EMIL | 0.00930304 | 2.20124 |
| ILMN_1804277 | CPN2    | 3  | Homo sapiens carboxypeptidase<br>N, polypeptide 2 (CPN2), mRNA.                                                  | ACBP                    | 0.0290881  | 2.20046 |
| ILMN_1797009 | HSPA2   | 14 | Homo sapiens heat shock 70kDa<br>protein 2 (HSPA2), mRNA.                                                        |                         | 0.0344169  | 2.19697 |
| ILMN_1718046 | PTPRE   | 10 | Homo sapiens protein tyrosine<br>phosphatase, receptor type, E<br>(PTPRE), transcript variant 2,<br>mRNA.        | DKFZp313F1310; PTPE; H  | 0.0156872  | 2.18803 |
| ILMN_1749078 | JAG1    | 20 | Homo sapiens jagged 1 (Alagille<br>syndrome) (JAG1), mRNA.                                                       | CD339; AWS; HJ1; JAGL1  | 0.0241429  | 2.18737 |
| ILMN_1677723 | MGP     | 12 | Homo sapiens matrix Gla protein<br>(MGP), mRNA.                                                                  | NTI; GIG36; MGLAP       | 0.00270838 | 2.18727 |



|              |         |    |                                                                                                                       |                          |             |         |
|--------------|---------|----|-----------------------------------------------------------------------------------------------------------------------|--------------------------|-------------|---------|
| ILMN_1742789 | ITM2C   | 2  | Homo sapiens integral membrane protein 2C (ITM2C), transcript variant 2, mRNA.                                        | E25; ITM3; BRI3; E25C; I | 0.0470026   | 2.18688 |
| ILMN_1743933 | LBH     | 2  | Homo sapiens limb bud and heart development homolog (mouse) (LBH), mRNA.                                              | MGC163287; MGC104312     | 0.0141094   | 2.1825  |
| ILMN_1729217 | GFRA1   | 10 | Homo sapiens GDNF family receptor alpha 1 (GFRA1), transcript variant 1, mRNA.                                        | MGC23045; RET1L; TRNR    | 0.0169591   | 2.1819  |
| ILMN_1706015 | COL1A2  | 7  | Homo sapiens collagen, type I, alpha 2 (COL1A2), mRNA.                                                                | OI4                      | 0.0122191   | 2.18165 |
| ILMN_1702301 | SYT11   | 1  | Homo sapiens synaptotagmin XI (SYT11), mRNA.                                                                          | MGC17226; DKFZp781DC     | 0.0438955   | 2.17826 |
| ILMN_1789364 | UGCG    | 9  | Homo sapiens UDP-glucose ceramide glucosyltransferase (UGCG), mRNA.                                                   | GCS                      | 0.0304713   | 2.17826 |
| ILMN_2361862 | CD300LG | 17 | Homo sapiens CD300 molecule-like family member g (CD300LG), mRNA.                                                     | CLM9; TREM4              | 0.000257406 | 2.17756 |
| ILMN_1812559 | ACACA   | 17 | Homo sapiens acetyl-Coenzyme A carboxylase alpha (ACACA), transcript variant 3, mRNA.                                 | ACC; ACC1; ACAC; ACCA    | 0.0126641   | 2.17571 |
| ILMN_1674380 | FCN2    | 9  | Homo sapiens ficolin (collagen/fibrinogen domain containing lectin) 2 (hucolin) (FCN2), transcript variant SV1, mRNA. | EBP-37; FCNL; ficolin-2; | 0.0215165   | 2.17257 |
| ILMN_1659371 |         |    | UI-1-BC1p-aky-f-10-0-UI.s1 NCI_CGAP_PI3 Homo sapiens cDNA clone UI-1-BC1p-aky-f-10-0-UI 3, mRNA sequence              |                          | 0.0232676   | 2.1639  |
| ILMN_1758825 | NBL1    | 1  | Homo sapiens neuroblastoma, suppression of tumorigenicity 1 (NBL1), transcript variant 2, mRNA.                       | D1S1733E; NB; NO3; DA    | 0.020094    | 2.16358 |

|              |         |    |                                                                                                 |                         |             |         |
|--------------|---------|----|-------------------------------------------------------------------------------------------------|-------------------------|-------------|---------|
| ILMN_1713499 | CACNB3  | 12 | Homo sapiens calcium channel, voltage-dependent, beta 3 subunit (CACNB3), mRNA.                 | CACNLB3                 | 0.0348385   | 2.15994 |
| ILMN_2094776 | PRO0628 | 20 | Homo sapiens PRO0628 protein (PRO0628) on chromosome 20.                                        |                         | 0.0323215   | 2.1571  |
| ILMN_1698605 | FLRT2   | 14 | Homo sapiens fibronectin leucine rich transmembrane protein 2 (FLRT2), mRNA.                    | KIAA0405                | 0.00770136  | 2.15558 |
| ILMN_1778321 | HBD     | 11 | Homo sapiens hemoglobin, delta (HBD), mRNA.                                                     |                         | 0.0231288   | 2.15507 |
| ILMN_1751143 | BIRC3   | 11 | Homo sapiens baculoviral IAP repeat-containing 3 (BIRC3), transcript variant 2, mRNA.           | RNF49; MALT2; API2; HIA | 0.031214    | 2.15433 |
| ILMN_1733756 |         |    | Homo sapiens cDNA FLJ32401 fis, clone SKMUS2000339                                              |                         | 0.0252298   | 2.15256 |
| ILMN_1785170 | CCDC3   | 10 | Homo sapiens coiled-coil domain containing 3 (CCDC3), mRNA.                                     | FLJ20925; DKFZP761F24   | 0.0208191   | 2.15212 |
| ILMN_1791569 | SYTL2   | 11 | Homo sapiens synaptotagmin-like 2 (SYTL2), transcript variant d, mRNA.                          | MGC102768; CHR11SYT;    | 0.00948592  | 2.15169 |
| ILMN_1699574 | GPR37   | 7  | Homo sapiens G protein-coupled receptor 37 (endothelin receptor type B-like) (GPR37), mRNA.     | hET(B)R-LP; EDNRBL; PA  | 0.0148028   | 2.15115 |
| ILMN_1677511 | RALYL   | 8  | Homo sapiens RALY RNA binding protein-like (RALYL), transcript variant 3, mRNA.                 | HNRPCL3                 | 0.0374307   | 2.15073 |
| ILMN_1807003 | THRSP   | 11 | Homo sapiens thyroid hormone responsive (SPOT14 homolog, rat) (THRSP), mRNA.                    | MGC21659; S14; SPOT14   | 0.0112811   | 2.14884 |
| ILMN_1724753 | TFF3    | 21 | Homo sapiens trefoil factor 3 (intestinal) (TFF3), mRNA.                                        | TFI; hP1.B; HITF; ITF   | 0.000844158 | 2.14849 |
| ILMN_1911042 | MAD1L1  | 7  | Homo sapiens MAD1 mitotic arrest deficient-like 1 (yeast) (MAD1L1), transcript variant 2, mRNA. | PIG9; HsMAD1; TXBP181   | 0.0192663   | 2.14727 |

|              |          |    |                                                                                    |                        |            |         |
|--------------|----------|----|------------------------------------------------------------------------------------|------------------------|------------|---------|
| ILMN_1784608 | JAG2     | 14 | Homo sapiens jagged 2 (JAG2), transcript variant 1, mRNA.                          | HJ2                    | 0.0176016  | 2.14617 |
| ILMN_1685625 |          |    | full-length cDNA clone XCLOBB001ZD04 of Neuroblastoma of Homo sapiens (human)      |                        | 0.0100555  | 2.14412 |
| ILMN_2097793 | STK39    | 2  | Homo sapiens serine threonine kinase 39 (STE20/SPS1 homolog, yeast) (STK39), mRNA. | DCHT; PASK; SPAK; DKF  | 0.0111041  | 2.1427  |
| ILMN_1699208 | CCL2     | 17 | Homo sapiens chemokine (C-C motif) ligand 2 (CCL2), mRNA.                          | SMC-CF; MCP1; MCAF; H  | 0.00667662 | 2.14199 |
| ILMN_1743836 | GAS1     | 9  | Homo sapiens growth arrest-specific 1 (GAS1), mRNA.                                |                        | 0.00553338 | 2.14144 |
| ILMN_2331231 | DIDO1    | 20 | Homo sapiens death inducer-obliterator 1 (DIDO1), transcript variant 3, mRNA.      | dJ885L7.8; DIDO3; DATF | 0.0175381  | 2.14093 |
| ILMN_1659544 | STOM     | 9  | Homo sapiens stomatin (STOM), transcript variant 1, mRNA.                          | EPB7; EPB72; BND7      | 0.00211031 | 2.13947 |
| ILMN_1652246 | C21orf41 | 21 | Homo sapiens chromosome 21 open reading frame 41 (C21orf41) on chromosome 21.      |                        | 0.0286606  | 2.13553 |
| ILMN_1653166 | PID1     | 2  | Homo sapiens phosphotyrosine interaction domain containing 1 (PID1), mRNA.         | HMFN2073; FLJ20701; N  | 0.0454781  | 2.13551 |
| ILMN_2103547 | C7       | 5  | Homo sapiens complement component 7 (C7), mRNA.                                    |                        | 0.0308929  | 2.1344  |
| ILMN_1795118 | ELA2     | 19 | Homo sapiens elastase 2, neutrophil (ELA2), mRNA.                                  | HLE; GE; PMN-E; NE; HN | 0.00708129 | 2.13408 |
| ILMN_1716488 | MTM      | 16 | Homo sapiens metallothionein M (MTM), mRNA.                                        |                        | 0.0242461  | 2.13043 |
| ILMN_2318638 | BTN3A2   | 6  | Homo sapiens butyrophilin, subfamily 3, member A2 (BTN3A2), mRNA.                  | BT3.3; BT3.2; BTF4     | 0.00257961 | 2.12969 |

|              |        |    |                                                                                                                                     |                       |            |         |
|--------------|--------|----|-------------------------------------------------------------------------------------------------------------------------------------|-----------------------|------------|---------|
| ILMN_1697309 | FCN3   | 1  | Homo sapiens fibronectin (collagen/fibrinogen domain containing) 3 (Hakata antigen) (FCN3), transcript variant 2, mRNA.             | MGC22543; FCNH; HAKA  | 0.0163677  | 2.12774 |
| ILMN_1765459 | CD97   | 19 | Homo sapiens CD97 molecule (CD97), transcript variant 1, mRNA.                                                                      | TM7LN1                | 0.0139021  | 2.12625 |
| ILMN_2390859 | GSTM1  | 1  | Homo sapiens glutathione S-transferase M1 (GSTM1), transcript variant 1, mRNA.                                                      | MGC26563; GSTM1-1; H- | 0.0376445  | 2.12488 |
| ILMN_1661491 | MRPL22 | 5  | Homo sapiens mitochondrial ribosomal protein L22 (MRPL22), nuclear gene encoding mitochondrial protein, transcript variant 1, mRNA. | HSPC158; DKFZp781F10  | 0.0151015  | 2.1242  |
| ILMN_1697268 | LIPG   | 18 | Homo sapiens lipase, endothelial (LIPG), mRNA.                                                                                      | EL; PRO719; EDL       | 0.0285904  | 2.1241  |
| ILMN_1721833 | PDE9A  | 21 | Homo sapiens phosphodiesterase 9A (PDE9A), transcript variant 2, mRNA.                                                              | HSPDE9A2              | 0.0494721  | 2.11965 |
| ILMN_1806403 | HPGD   | 4  | Homo sapiens hydroxyprostaglandin dehydrogenase 15-(NAD) (HPGD), mRNA.                                                              | PGDH; 15-PGDH; PGDH1  | 0.0392182  | 2.11897 |
| ILMN_1763605 | VWF    | 12 | Homo sapiens von Willebrand factor (VWF), mRNA.                                                                                     | F8VWF; VWD            | 0.0221028  | 2.11888 |
| ILMN_1704730 | AZGP1  | 7  | Homo sapiens alpha-2-glycoprotein 1, zinc-binding (AZGP1), mRNA.                                                                    | ZAG; ZA2G             | 0.00395194 | 2.11776 |
| ILMN_1663648 | SH2B3  | 12 | Homo sapiens SH2B adaptor protein 3 (SH2B3), mRNA.                                                                                  | LNK                   | 0.0123267  | 2.11365 |
| ILMN_2203271 | TMEM17 | 2  | Homo sapiens transmembrane protein 17 (TMEM17), mRNA.                                                                               | FLJ34583              | 0.0191953  | 2.11295 |
| ILMN_1708375 | MASP2  | 1  | Homo sapiens mannan-binding lectin serine peptidase 2 (MASP2), transcript variant 1, mRNA.                                          | sMAP; MASP-2; MAP19   | 0.0481159  | 2.11167 |

|              |           |    |                                                                                                                                       |                          |             |         |
|--------------|-----------|----|---------------------------------------------------------------------------------------------------------------------------------------|--------------------------|-------------|---------|
| ILMN_1678143 | EFEMP2    | 11 | Homo sapiens EGF-containing fibulin-like extracellular matrix protein 2 (EFEMP2), mRNA.                                               | UPH1; FBLN4; MBP1        | 0.024711    | 2.1077  |
| ILMN_1659158 | KCNMA1    | 10 | Homo sapiens potassium large conductance calcium-activated channel, subfamily M, alpha member 1 (KCNMA1), transcript variant 2, mRNA. | MaxiK; SLO-ALPHA; MGC    | 0.0426955   | 2.10767 |
| ILMN_2396272 | LPXN      | 11 | Homo sapiens leupaxin (LPXN), mRNA.                                                                                                   | LDPL                     | 0.0178395   | 2.10367 |
| ILMN_2328378 | SP110     | 2  | Homo sapiens SP110 nuclear body protein (SP110), transcript variant b, mRNA.                                                          | FLJ22835; IF175; VODI; I | 0.000710822 | 2.10004 |
| ILMN_1731358 | SH2D3C    | 9  | Homo sapiens SH2 domain containing 3C (SH2D3C), transcript variant 2, mRNA.                                                           | NSP3; PRO34088; CHAT;    | 0.000964412 | 2.09846 |
| ILMN_2319000 | SLC13A5   | 17 | Homo sapiens solute carrier family 13 (sodium-dependent citrate transporter), member 5 (SLC13A5), mRNA.                               | MGC138356; NACT; DKF2    | 0.0266217   | 2.09586 |
| ILMN_2318643 | C6orf129  | 6  | Homo sapiens chromosome 6 open reading frame 129 (C6orf129), mRNA.                                                                    | HSPC265; MGC131656       | 0.0181133   | 2.09459 |
| ILMN_1703477 | PNKD      | 2  | Homo sapiens paroxysmal nonkinesigenic dyskinesia (PNKD), transcript variant 2, mRNA.                                                 | FKSG19; KIPP1184; MR1    | 0.00395106  | 2.0939  |
| ILMN_1658289 | LOC653498 | 17 | PREDICTED: Homo sapiens similar to TBC1 domain family, member 3B (LOC653498), mRNA.                                                   |                          | 0.0402943   | 2.09168 |
| ILMN_1790014 | MMAB      | 12 | Homo sapiens methylmalonic aciduria (cobalamin deficiency) cbIB type (MMAB), mRNA.                                                    | ATR; MGC20496            | 0.0251402   | 2.09129 |
| ILMN_1802151 | CD86      | 3  | Homo sapiens CD86 molecule (CD86), transcript variant 2, mRNA.                                                                        | B7-2; B70; LAB72; MGC3   | 0.0131645   | 2.09111 |

|              |           |    |                                                                                                  |                         |             |         |
|--------------|-----------|----|--------------------------------------------------------------------------------------------------|-------------------------|-------------|---------|
| ILMN_1703273 | PLAUR     | 19 | Homo sapiens plasminogen activator, urokinase receptor (PLAUR), transcript variant 2, mRNA.      | CD87; UPAR; URKR        | 0.000139908 | 2.09063 |
| ILMN_1768595 | EBP       | X  | Homo sapiens emopamil binding protein (sterol isomerase) (EBP), mRNA.                            | CDPX2; CPXD; CHO2; CP   | 0.000292829 | 2.0904  |
| ILMN_1730625 | TAT       | 16 | Homo sapiens tyrosine aminotransferase (TAT), nuclear gene encoding mitochondrial protein, mRNA. |                         | 0.0116018   | 2.09018 |
| ILMN_1846001 | SDCBP2    | 20 | Homo sapiens syndecan binding protein (syntenin) 2 (SDCBP2), transcript variant 2, mRNA.         | SITAC18; FLJ12256; ST-2 | 0.00245188  | 2.09008 |
| ILMN_2358069 | LBP       | 20 | Homo sapiens lipopolysaccharide binding protein (LBP), mRNA.                                     | MGC22233                | 0.0460206   | 2.08984 |
| ILMN_1787378 | ZBTB16    | 11 | Homo sapiens zinc finger and BTB domain containing 16 (ZBTB16), transcript variant 1, mRNA.      | PLZF; ZNF145            | 0.0239864   | 2.08929 |
| ILMN_1767377 | FHL2      | 2  | Homo sapiens four and a half LIM domains 2 (FHL2), transcript variant 2, mRNA.                   | SLIM3; AAG11; DRAL      | 0.0276484   | 2.08866 |
| ILMN_1737833 | IL1R2     | 2  | Homo sapiens interleukin 1 receptor, type II (IL1R2), transcript variant 2, mRNA.                | IL1RB; CD121b; MGC477   | 0.012236    | 2.08773 |
| ILMN_1775734 | GPR124    | 8  | Homo sapiens G protein-coupled receptor 124 (GPR124), mRNA.                                      | DKFZp434C211; TEM5; D   | 0.0121755   | 2.08726 |
| ILMN_1671046 | GLI2      | 2  | Homo sapiens GLI-Kruppel family member GLI2 (GLI2), mRNA.                                        | HPE9; THP2              | 0.00984793  | 2.08553 |
| ILMN_2330787 | ZNF462    | 9  | Homo sapiens zinc finger protein 462 (ZNF462), mRNA.                                             | FLJ45904; RP11-508N12.  | 0.0205079   | 2.08416 |
| ILMN_1762594 | KIAA1324L | 7  | Homo sapiens KIAA1324-like (KIAA1324L), mRNA.                                                    | FLJ31340                | 0.00692614  | 2.08274 |
| ILMN_1792404 | HYOU1     | 11 | Homo sapiens hypoxia up-regulated 1 (HYOU1), mRNA.                                               | DKFZp686N08236; ORP1    | 0.0105485   | 2.08164 |

|              |           |    |                                                                                                                                                          |                         |             |         |
|--------------|-----------|----|----------------------------------------------------------------------------------------------------------------------------------------------------------|-------------------------|-------------|---------|
| ILMN_1652065 | MT1M      | 16 | Homo sapiens metallothionein 1M (MT1M), mRNA.                                                                                                            | MT1; MGC118949; MT1K;   | 0.00134798  | 2.08126 |
| ILMN_1795835 | MOXD1     | 6  | Homo sapiens monooxygenase, DBH-like 1 (MOXD1), transcript variant 2, mRNA.                                                                              | MOX; dJ248E1.1; PRO578  | 0.0216607   | 2.08057 |
| ILMN_1718607 | LRRC49    | 15 | Homo sapiens leucine rich repeat containing 49 (LRRC49), mRNA.                                                                                           | FLJ20156                | 0.00524803  | 2.08048 |
| ILMN_1726809 | HBG2      | 11 | Homo sapiens hemoglobin, gamma G (HBG2), mRNA.                                                                                                           |                         | 0.0175117   | 2.08031 |
| ILMN_1785175 | FER1L4    | 20 | Homo sapiens fer-1-like 4 (C. elegans) (FER1L4) on chromosome 20.                                                                                        | dJ309K20.1; FLJ22613; b | 0.00530721  | 2.07915 |
| ILMN_1691942 | NR1I2     | 3  | Homo sapiens nuclear receptor subfamily 1, group I, member 2 (NR1I2), transcript variant 1, mRNA.                                                        | PAR; PRR; SAR; PAR1; O  | 0.0151734   | 2.07799 |
| ILMN_1675523 | PCBD1     | 10 | Homo sapiens 6-pyruvoyl-tetrahydropterin synthase/dimerization cofactor of hepatocyte nuclear factor 1 alpha (TCF1) (PCBD1), transcript variant 2, mRNA. | PHS; PCD; DCOH; PCBD    | 0.0368296   | 2.0779  |
| ILMN_1752046 | LSS       | 21 | Homo sapiens lanosterol synthase (2,3-oxidosqualene-lanosterol cyclase) (LSS), transcript variant 1, mRNA.                                               | OSC                     | 0.000165759 | 2.07574 |
| ILMN_2235137 | LOC338758 | 12 | PREDICTED: Homo sapiens hypothetical protein LOC338758 (LOC338758), mRNA.                                                                                |                         | 0.0071549   | 2.07233 |
| ILMN_1798663 | PALLD     | 4  | Homo sapiens palladin, cytoskeletal associated protein (PALLD), mRNA.                                                                                    | CGI-151; PNCA1; KIAA09  | 0.0222599   | 2.07133 |
| ILMN_2068257 | ARHGEF6   | X  | Homo sapiens Rac/Cdc42 guanine nucleotide exchange factor (GEF) 6 (ARHGEF6), mRNA.                                                                       | COOL2; PIXA; MRX46; KI  | 0.0136862   | 2.06987 |

|              |           |                   |                                                                                                                             |                        |             |         |
|--------------|-----------|-------------------|-----------------------------------------------------------------------------------------------------------------------------|------------------------|-------------|---------|
| ILMN_1682799 | SLC44A1   | 9                 | Homo sapiens solute carrier family 44, member 1 (SLC44A1), mRNA.                                                            | RP11-287A8.1; CHTL1; C | 0.0137977   | 2.06922 |
| ILMN_1714296 | KIAA1641  |                   | PREDICTED: Homo sapiens KIAA1641, transcript variant 7 (KIAA1641), mRNA.                                                    |                        | 0.0211211   | 2.06859 |
| ILMN_2130078 | ECE2      | 3                 | Homo sapiens endothelin converting enzyme 2 (ECE2), transcript variant 1, mRNA.                                             | MGC2408; KIAA0604      | 0.0345077   | 2.06563 |
| ILMN_2233366 | P2RY8     | Un NW_001841157.1 | Homo sapiens purinergic receptor P2Y, G-protein coupled, 8 (P2RY8), mRNA.                                                   | MGC50878; P2Y8         | 0.000310018 | 2.06527 |
| ILMN_1694589 | PCSK6     | 15                | Homo sapiens proprotein convertase subtilisin/kexin type 6 (PCSK6), transcript variant 6, mRNA.                             | PACE4; SPC4            | 0.00059495  | 2.06417 |
| ILMN_1731418 | PPP2R1B   | 11                | Homo sapiens protein phosphatase 2 (formerly 2A), regulatory subunit A, beta isoform (PPP2R1B), transcript variant 2, mRNA. | MGC26454; PR65B        | 0.0114281   | 2.06234 |
| ILMN_2059549 | PC        | 11                | Homo sapiens pyruvate carboxylase (PC), nuclear gene encoding mitochondrial protein, transcript variant 2, mRNA.            | PCB                    | 0.0151343   | 2.06085 |
| ILMN_2317751 | LOC647450 |                   | PREDICTED: Homo sapiens similar to Ig kappa chain V-I region HK101 precursor (LOC647450), mRNA.                             |                        | 0.0167757   | 2.05954 |
| ILMN_1803945 | BIRC3     | 11                | Homo sapiens baculoviral IAP repeat-containing 3 (BIRC3), transcript variant 1, mRNA.                                       | RNF49; MALT2; MIHC; HA | 0.0404014   | 2.05931 |
| ILMN_1714602 | HAX1      | 1                 | Homo sapiens HCLS1 associated protein X-1 (HAX1), transcript variant 1, mRNA.                                               | HCLSBP1; SCN3; HS1BP1  | 0.0403148   | 2.05867 |
| ILMN_1768311 | STC2      | 5                 | Homo sapiens stanniocalcin 2 (STC2), mRNA.                                                                                  | STCRP; STC-2           | 0.0339275   | 2.05564 |



|              |         |    |                                                                                                                          |                         |            |         |
|--------------|---------|----|--------------------------------------------------------------------------------------------------------------------------|-------------------------|------------|---------|
| ILMN_2340027 | FCN1    | 9  | Homo sapiens ficolin (collagen/fibrinogen domain containing) 1 (FCN1), mRNA.                                             | FCNM                    | 0.0140761  | 2.05478 |
| ILMN_1669390 | FANCC   | 9  | Homo sapiens Fanconi anemia, complementation group C (FANCC), mRNA.                                                      | FLJ14675; FA3; FACC; FA | 0.0326355  | 2.05386 |
| ILMN_1774077 | VANGL2  | 1  | Homo sapiens vang-like 2 (van gogh, Drosophila) (VANGL2), mRNA.                                                          | MGC119404; LTAP; MGC1   | 0.0359089  | 2.05209 |
| ILMN_1745778 | CCND2   | 12 | Homo sapiens cyclin D2 (CCND2), mRNA.                                                                                    | KIAK0002; MGC102758     | 0.0402852  | 2.05102 |
| ILMN_1771599 | TMEM37  | 2  | Homo sapiens transmembrane protein 37 (TMEM37), mRNA.                                                                    | PR1; PR; CACNG5         | 0.00142863 | 2.04753 |
| ILMN_1744912 | ABCB4   | 7  | Homo sapiens ATP-binding cassette, sub-family B (MDR/TAP), member 4 (ABCB4), transcript variant C, mRNA.                 | PGY3; PFIC-3; MDR2/3; M | 0.00602958 | 2.04601 |
| ILMN_1894072 | SLC12A2 | 5  | Homo sapiens solute carrier family 12 (sodium/potassium/chloride transporters), member 2 (SLC12A2), mRNA.                | NKCC1; BSC2; MGC1042    | 0.0112535  | 2.04237 |
| ILMN_2210386 | GLYAT   | 11 | Homo sapiens glycine-N-acyltransferase (GLYAT), nuclear gene encoding mitochondrial protein, transcript variant 1, mRNA. | ACGNAT; CAT; GAT        | 0.00968689 | 2.04232 |
| ILMN_1660727 |         |    | AGENCOURT_8122036<br>Lupski_dorsal_root_ganglion<br>Homo sapiens cDNA clone IMAGE:6179261 5, mRNA sequence               |                         | 0.00984507 | 2.04229 |
| ILMN_2408576 | OAS3    | 12 | Homo sapiens 2'-5'-oligoadenylate synthetase 3, 100kDa (OAS3), mRNA.                                                     | MGC133260; p100         | 0.0182049  | 2.04074 |
| ILMN_1668374 | NTN4    | 12 | Homo sapiens netrin 4 (NTN4), mRNA.                                                                                      | PRO3091; FLJ23180       | 0.0324203  | 2.04067 |

|              |          |    |                                                                                                                |                         |            |         |
|--------------|----------|----|----------------------------------------------------------------------------------------------------------------|-------------------------|------------|---------|
| ILMN_1718734 | MPDU1    | 17 | Homo sapiens mannose-P-dolichol utilization defect 1 (MPDU1), mRNA.                                            | CDGIF; HBEBP2BPA; FLJ1  | 0.0300331  | 2.04057 |
| ILMN_1786429 | SOX4     | 6  | Homo sapiens SRY (sex determining region Y)-box 4 (SOX4), mRNA.                                                | EVI16                   | 0.0418488  | 2.04045 |
| ILMN_2374687 | ADD3     | 10 | Homo sapiens adducin 3 (gamma) (ADD3), transcript variant 1, mRNA.                                             | ADDL                    | 0.0294593  | 2.03773 |
| ILMN_1696843 | KCNMB1   | 5  | Homo sapiens potassium large conductance calcium-activated channel, subfamily M, beta member 1 (KCNMB1), mRNA. | K(VCA)beta; SLO-BETA; K | 0.0244318  | 2.03609 |
| ILMN_1717046 | PAPLN    | 14 | Homo sapiens papilin, proteoglycan-like sulfated glycoprotein (PAPLN), mRNA.                                   | DKFZp434F053; MGC504    | 0.00163891 | 2.0345  |
| ILMN_1799026 | SPINK1   | 5  | Homo sapiens serine peptidase inhibitor, Kazal type 1 (SPINK1), mRNA.                                          | Spink3; PCTT; PSTI; TAT | 0.0224878  | 2.03397 |
| ILMN_1777721 | STEAP3   | 2  | Homo sapiens STEAP family member 3 (STEAP3), transcript variant 1, mRNA.                                       | STMP3; dudlin-2; TSAP6  | 0.00183293 | 2.03395 |
| ILMN_1692145 | ACMSD    | 2  | Homo sapiens aminocarboxymuconate semialdehyde decarboxylase (ACMSD), mRNA.                                    |                         | 0.0297658  | 2.03334 |
| ILMN_1815121 | NPC1L1   | 7  | Homo sapiens NPC1 (Niemann-Pick disease, type C1, gene)-like 1 (NPC1L1), mRNA.                                 |                         | 0.00210376 | 2.03103 |
| ILMN_1666078 | ARHGAP23 | 17 | PREDICTED: Homo sapiens Rho GTPase activating protein 23, transcript variant 1 (ARHGAP23), mRNA.               |                         | 0.0483363  | 2.03095 |
| ILMN_1754179 | LHFPL3   | 7  | Homo sapiens lipoma HMGIC fusion partner-like 3 (LHFPL3), mRNA.                                                | LHFPL4                  | 0.010345   | 2.03064 |
| ILMN_1779031 | S100A11  | 1  | Homo sapiens S100 calcium binding protein A11 (S100A11), mRNA.                                                 | S100C; MLN70            | 0.0332373  | 2.03048 |

|              |           |    |                                                                                                                   |                         |             |         |
|--------------|-----------|----|-------------------------------------------------------------------------------------------------------------------|-------------------------|-------------|---------|
| ILMN_1695959 | PODXL     | 7  | Homo sapiens podocalyxin-like (PODXL), transcript variant 1, mRNA.                                                | MGC138240; PCLP; Gp20   | 0.0464917   | 2.02975 |
| ILMN_1727689 | TADA1L    | 1  | Homo sapiens transcriptional adaptor 1 (HF11 homolog, yeast)-like (TADA1L), mRNA.                                 | RP1-9E21.4; KIAA0764; S | 0.00751697  | 2.02887 |
| ILMN_1756071 | PCSK6     | 15 | Homo sapiens proprotein convertase subtilisin/kexin type 6 (PCSK6), transcript variant 7, mRNA.                   | PACE4; SPC4             | 0.0399408   | 2.02816 |
| ILMN_1665040 | LYVE1     | 11 | Homo sapiens lymphatic vessel endothelial hyaluronan receptor 1 (LYVE1), mRNA.                                    | CRSBP-1; XLKD1; LYVE-1  | 0.0412418   | 2.02806 |
| ILMN_2062714 | PTGS2     | 1  | Homo sapiens prostaglandin-endoperoxide synthase 2 (prostaglandin G/H synthase and cyclooxygenase) (PTGS2), mRNA. | PHS-2; COX-2; hCox-2; F | 0.0318892   | 2.01992 |
| ILMN_2213834 | RALGPS1   | 9  | Homo sapiens Ras GEF with PH domain and SH3 binding motif 1 (RALGPS1), mRNA.                                      | KIAA0351; RALGPS1A; R   | 0.0340917   | 2.01698 |
| ILMN_2380494 | HCG4      | 6  | Homo sapiens HLA complex group 4 (HCG4) on chromosome 6.                                                          | HCGIV.9                 | 0.000631986 | 2.01582 |
| ILMN_2415748 | LOC654174 |    | PREDICTED: Homo sapiens similar to lethal (2) k00619 CG4775-PA (LOC654174), mRNA.                                 |                         | 0.0225725   | 2.01575 |
| ILMN_1692398 | CAV1      | 7  | Homo sapiens caveolin 1, caveolae protein, 22kDa (CAV1), mRNA.                                                    | CAV; VIP21; MSTP085     | 0.00730033  | 2.01482 |
| ILMN_1693766 | S100A8    | 1  | Homo sapiens S100 calcium binding protein A8 (S100A8), mRNA.                                                      | CFAG; 60B8AG; MRP8; C   | 0.0177728   | 2.01381 |

|              |           |    |                                                                                                                                                                     |                        |            |         |
|--------------|-----------|----|---------------------------------------------------------------------------------------------------------------------------------------------------------------------|------------------------|------------|---------|
| ILMN_1744212 | SEMA4B    | 15 | Homo sapiens sema domain, immunoglobulin domain (Ig), transmembrane domain (TM) and short cytoplasmic domain, (semaphorin) 4B (SEMA4B), transcript variant 2, mRNA. | KIAA1745; SemC; SEMA4B | 0.00291036 | 2.01306 |
| ILMN_2415144 | LOC651898 |    | PREDICTED: Homo sapiens similar to Ig kappa chain V-II region Cum (LOC651898), mRNA.                                                                                |                        | 0.0151825  | 2.01289 |
| ILMN_1697491 | SRPRB     | 3  | Homo sapiens signal recognition particle receptor, B subunit (SRPRB), mRNA.                                                                                         | APMCF1                 | 0.0062727  | 2.01288 |
| ILMN_1726981 | ZNF545    | 19 | Homo sapiens zinc finger protein 545 (ZNF545), mRNA.                                                                                                                | MGC45380; KIAA1948     | 0.0129472  | 2.0128  |
| ILMN_1727183 | VSIG4     | X  | Homo sapiens V-set and immunoglobulin domain containing 4 (VSIG4), transcript variant 1, mRNA.                                                                      | CRIg; Z39IG            | 0.0185799  | 2.01146 |
| ILMN_1674135 | CTSK      | 1  | Homo sapiens cathepsin K (CTSK), mRNA.                                                                                                                              | CTSO2; CTSO; CTSO1; P  | 0.039881   | 2.01065 |
| ILMN_1682783 | HARS      | 5  | Homo sapiens histidyl-tRNA synthetase (HARS), mRNA.                                                                                                                 | FLJ20491; HRS          | 0.00731457 | 2.00937 |
| ILMN_1660193 | STARD5    | 15 | Homo sapiens StAR-related lipid transfer (START) domain containing 5 (STARD5), mRNA.                                                                                | MGC10327               | 0.00680213 | 2.00925 |
| ILMN_2208802 | ALDOC     | 17 | Homo sapiens aldolase C, fructose-bisphosphate (ALDOC), mRNA.                                                                                                       | ALDC                   | 0.00160603 | 2.00888 |
| ILMN_1756982 | LRRC1     | 6  | Homo sapiens leucine rich repeat containing 1 (LRRC1), mRNA.                                                                                                        | dJ523E19.1; LANO; FLJ1 | 0.009707   | 2.00846 |
| ILMN_1804419 | P4HA1     | 10 | Homo sapiens procollagen-proline, 2-oxoglutarate 4-dioxygenase (proline 4-hydroxylase), alpha polypeptide I (P4HA1), transcript variant 1, mRNA.                    | P4HA; 4-PH alpha-1     | 0.0132439  | 2.00808 |

|              |          |    |                                                                                                                    |                         |            |         |
|--------------|----------|----|--------------------------------------------------------------------------------------------------------------------|-------------------------|------------|---------|
| ILMN_2400759 | RAC2     | 22 | Homo sapiens ras-related C3 botulinum toxin substrate 2 (rho family, small GTP binding protein Rac2) (RAC2), mRNA. | Gx; EN-7; HSPC022       | 0.0297931  | 2.0078  |
| ILMN_1781812 | RXRA     | 9  | Homo sapiens retinoid X receptor, alpha (RXRA), mRNA.                                                              | FLJ16020; FLJ16733; NR2 | 0.0133568  | 2.00691 |
| ILMN_1698038 | C11orf71 | 11 | Homo sapiens chromosome 11 open reading frame 71 (C11orf71), mRNA.                                                 | FLJ20010                | 0.0385418  | 2.0059  |
| ILMN_1722872 | COL4A2   | 13 | Homo sapiens collagen, type IV, alpha 2 (COL4A2), mRNA.                                                            | FLJ22259; DKFZp6861142  | 0.0261755  | 2.00565 |
| ILMN_1679797 | SPRYD4   | 12 | Homo sapiens SPRY domain containing 4 (SPRYD4), mRNA.                                                              | DKFZp686N0877           | 0.00911102 | 2.00501 |
| ILMN_1694432 | SAA4     | 11 | Homo sapiens serum amyloid A4, constitutive (SAA4), mRNA.                                                          | CSAA; C-SAA             | 0.0146507  | 2.00459 |
| ILMN_1747160 | BEX4     | X  | Homo sapiens BEX family member 4 (BEX4), mRNA.                                                                     | BEXL1; BEX4; FLJ10097   | 0.00577082 | 2.00411 |
| ILMN_2364376 | PTGES    | 9  | Homo sapiens prostaglandin E synthase (PTGES), mRNA.                                                               | mPGES-1; MGST1L1; MG    | 0.00190793 | 2.00345 |
| ILMN_1727574 | PSCD4    | 22 | Homo sapiens pleckstrin homology, Sec7 and coiled-coil domains 4 (PSCD4), mRNA.                                    | DJ63G5.1; CYT4          | 0.0376192  | 2.00294 |
| ILMN_1779171 | ZPLD1    | 3  | Homo sapiens zona pellucida-like domain containing 1 (ZPLD1), mRNA.                                                |                         | 0.0219516  | 2.0027  |
| ILMN_1765310 | GCHFR    | 15 | Homo sapiens GTP cyclohydrolase I feedback regulator (GCHFR), mRNA.                                                | HsT16933; MGC138467;    | 0.00252761 | 2.00246 |
| ILMN_1788689 | KIAA1881 |    | PREDICTED: Homo sapiens KIAA1881 (KIAA1881), mRNA.                                                                 |                         | 0.0162561  | 2.00216 |
| ILMN_1757237 | CRHBP    | 5  | Homo sapiens corticotropin releasing hormone binding protein (CRHBP), mRNA.                                        | CRFBP; CRF-BP           | 0.0186613  | 2.00195 |
| ILMN_1677261 | FER1L3   | 10 | Homo sapiens fer-1-like 3, myoferlin (C. elegans) (FER1L3), transcript variant 2, mRNA.                            | FLJ36571; FLJ90777; MYO | 0.00115636 | 2.00119 |

|              |           |    |                                                                                                                              |                        |             |          |
|--------------|-----------|----|------------------------------------------------------------------------------------------------------------------------------|------------------------|-------------|----------|
| ILMN_1661342 | SC5DL     | 11 | Homo sapiens sterol-C5-desaturase (ERG3 delta-5-desaturase homolog, S. cerevisiae)-like (SC5DL), transcript variant 1, mRNA. | ERG3; SC5D; S5DES      | 0.0357156   | 2.00118  |
| ILMN_1742544 | SRGAP1    | 12 | Homo sapiens SLIT-ROBO Rho GTPase activating protein 1 (SRGAP1), mRNA.                                                       | ARHGAP13; KIAA1304; F  | 0.0156556   | 2.00083  |
| ILMN_1912737 | LOC730525 |    | PREDICTED: Homo sapiens hypothetical protein LOC730525 (LOC730525), mRNA.                                                    |                        | 0.0108632   | -2.00128 |
| ILMN_1892608 | ANXA11    | 10 | Homo sapiens annexin A11 (ANXA11), transcript variant c, mRNA.                                                               | ANX11; CAP50           | 0.000743834 | -2.00134 |
| ILMN_1722407 | TSPYL2    | X  | Homo sapiens TSPY-like 2 (TSPYL2), mRNA.                                                                                     | CDA1; CINAP; CTCL; SE2 | 2.29E-08    | -2.00198 |
| ILMN_1742109 | PPP2R1B   | 11 | Homo sapiens protein phosphatase 2 (formerly 2A), regulatory subunit A, beta isoform (PPP2R1B), transcript variant 2, mRNA.  | MGC26454; PR65B        | 0.0035976   | -2.00267 |
| ILMN_1754304 | MNDA      | 1  | Homo sapiens myeloid cell nuclear differentiation antigen (MNDA), mRNA.                                                      | PYHIN3                 | 0.0111264   | -2.00494 |
| ILMN_1750974 | PMEPA1    | 20 | Homo sapiens prostate transmembrane protein, androgen induced 1 (PMEPA1), transcript variant 2, mRNA.                        | STAG1; PMEPA1          | 0.0256156   | -2.00535 |
| ILMN_1675117 | ACOT4     | 14 | Homo sapiens acyl-CoA thioesterase 4 (ACOT4), mRNA.                                                                          | PTE-1b; PTE2B; PTE1B   | 0.0444027   | -2.00664 |
| ILMN_1812091 | TAX1BP3   | 17 | Homo sapiens TAX1 (human T-cell leukemia virus type I) binding protein 3 (TAX1BP3), mRNA.                                    | TIP-1                  | 0.0168257   | -2.00798 |

|              |           |    |                                                                                                               |                         |             |          |
|--------------|-----------|----|---------------------------------------------------------------------------------------------------------------|-------------------------|-------------|----------|
| ILMN_1661490 | PLA2G4C   | 19 | Homo sapiens phospholipase A2, group IVC (cytosolic, calcium-independent) (PLA2G4C), mRNA.                    | CPLA2-gamma; DKFZp58    | 0.00177672  | -2.01167 |
| ILMN_1691156 | C1orf165  | 1  | Homo sapiens chromosome 1 open reading frame 165 (C1orf165), mRNA.                                            | FLJ11588                | 0.00330232  | -2.01218 |
| ILMN_1756402 | SPARC     | 5  | Homo sapiens secreted protein, acidic, cysteine-rich (osteonectin) (SPARC), mRNA.                             | ON                      | 0.00925803  | -2.0134  |
| ILMN_1794505 | LOC123876 | 16 | Homo sapiens hypothetical protein LOC123876 (LOC123876), mRNA.                                                | MGC150530; A-923A4.1    | 0.000434776 | -2.01485 |
| ILMN_1712707 | MSRB3     | 12 | Homo sapiens methionine sulfoxide reductase B3 (MSRB3), transcript variant 1, mRNA.                           | FLJ36866; DKFZp686C11   | 0.00945163  | -2.01577 |
| ILMN_1688242 | NUDT5     | 10 | Homo sapiens nudix (nucleoside diphosphate linked moiety X)-type motif 5 (NUDT5), mRNA.                       | hYSAH1; YSA1H           | 0.00223046  | -2.01807 |
| ILMN_1676413 | CCL23     | 17 | Homo sapiens chemokine (C-C motif) ligand 23 (CCL23), transcript variant CKbeta8, mRNA.                       | Ckb-8-1; CKb8; CK-BETA  | 0.046338    | -2.0182  |
| ILMN_2274923 | LOC728888 | 16 | PREDICTED: Homo sapiens similar to Protein KIAA0220 (LOC728888), mRNA.                                        |                         | 0.0228774   | -2.01922 |
| ILMN_1774949 | SEC14L4   | 22 | Homo sapiens SEC14-like 4 (S. cerevisiae) (SEC14L4), mRNA.                                                    | TAP3                    | 0.0200366   | -2.01952 |
| ILMN_1801378 | ALPL      | 1  | Homo sapiens alkaline phosphatase, liver/bone/kidney (ALPL), mRNA.                                            | TNSALP; HOPS; FLJ40094  | 1.85E-05    | -2.01973 |
| ILMN_1752574 | EFEMP1    | 2  | Homo sapiens EGF-containing fibulin-like extracellular matrix protein 1 (EFEMP1), transcript variant 1, mRNA. | FBNL; MLVT; FLJ35535; F | 0.00200239  | -2.0217  |

|              |         |    |                                                                                                               |                         |             |          |
|--------------|---------|----|---------------------------------------------------------------------------------------------------------------|-------------------------|-------------|----------|
| ILMN_2067852 | FKSG30  | 2  | Homo sapiens actin-like protein (FKSG30), mRNA.                                                               | ACT                     | 0.00677074  | -2.02275 |
| ILMN_1765668 | SNAP25  | 20 | Homo sapiens synaptosomal-associated protein, 25kDa (SNAP25), transcript variant 2, mRNA.                     | SNAP; dJ1068F16.2; SNA  | 0.0134551   | -2.02309 |
| ILMN_2410986 | GBP2    | 1  | Homo sapiens guanylate binding protein 2, interferon-inducible (GBP2), mRNA.                                  |                         | 0.00246736  | -2.02342 |
| ILMN_1766054 | ZBTB16  | 11 | Homo sapiens zinc finger and BTB domain containing 16 (ZBTB16), transcript variant 1, mRNA.                   | PLZF; ZNF145            | 0.000902024 | -2.02356 |
| ILMN_1663220 | LFNG    | 7  | Homo sapiens LFNG O-fucosylpeptide 3-beta-N-acetylglucosaminyltransferase (LFNG), transcript variant 1, mRNA. | SCDO3                   | 8.54E-06    | -2.02542 |
| ILMN_1809613 | ILDR1   | 3  | Homo sapiens immunoglobulin-like domain containing receptor 1 (ILDR1), mRNA.                                  | ILDR1alpha; MGC50831;   | 0.00782111  | -2.02776 |
| ILMN_1663718 | NR1I2   | 3  | Homo sapiens nuclear receptor subfamily 1, group I, member 2 (NR1I2), transcript variant 3, mRNA.             | PAR; PRR; SAR; PAR1; O  | 0.00138394  | -2.03189 |
| ILMN_1808301 | C5orf13 | 5  | Homo sapiens chromosome 5 open reading frame 13 (C5orf13), mRNA.                                              | PTZ17; D4S114; PRO187   | 0.00365644  | -2.03437 |
| ILMN_1689156 | AFMID   | 17 | Homo sapiens arylformamidase (AFMID), mRNA.                                                                   | KF; MGC167063; DKFZp6   | 0.00479997  | -2.03485 |
| ILMN_2223350 | THADA   | 2  | Homo sapiens thyroid adenoma associated (THADA), transcript variant 1, mRNA.                                  | GITA; FLJ44016; KIAA176 | 0.0057117   | -2.03599 |
| ILMN_1691946 |         |    | 601452348FT NIH_MGC_66<br>Homo sapiens cDNA clone IMAGE:3856355 5, mRNA sequence                              |                         | 4.30E-05    | -2.0377  |



|              |           |    |                                                                                                                             |                        |             |          |
|--------------|-----------|----|-----------------------------------------------------------------------------------------------------------------------------|------------------------|-------------|----------|
| ILMN_1791678 | OIT3      | 10 | Homo sapiens oncoprotein induced transcript 3 (OIT3), mRNA.                                                                 | LZP; FLJ39116          | 0.00623792  | -2.03887 |
| ILMN_1754055 | MXRA8     | 1  | Homo sapiens matrix-remodelling associated 8 (MXRA8), mRNA.                                                                 | MGC3047; DKFZp586E20   | 0.0415432   | -2.03957 |
| ILMN_2194649 | CBLN3     | 14 | Homo sapiens cerebellin 3 precursor (CBLN3), mRNA.                                                                          | PRO1486                | 0.0165369   | -2.04221 |
| ILMN_1696946 | SAR1B     | 5  | Homo sapiens SART gene homolog B ( <i>S. cerevisiae</i> ) (SAR1B), transcript variant 1, mRNA.                              | CMRD; SARA2; GTBPB     | 0.0326459   | -2.04356 |
| ILMN_1759117 | SNCAIP    | 5  | Homo sapiens synuclein, alpha interacting protein (synphilin) (SNCAIP), mRNA.                                               | MGC39814; SYPH1        | 0.0370416   | -2.04689 |
| ILMN_1725773 | C1orf54   | 1  | Homo sapiens chromosome 1 open reading frame 54 (C1orf54), mRNA.                                                            | FLJ23221               | 0.000774008 | -2.04774 |
| ILMN_1793628 | DTX3      | 12 | Homo sapiens deltex 3 homolog ( <i>Drosophila</i> ) (DTX3), mRNA.                                                           | FLJ34766; MGC138863; M | 0.000121171 | -2.04948 |
| ILMN_2352609 | LOC401845 | 16 | PREDICTED: Homo sapiens similar to Ig heavy chain V-II region SESS precursor (LOC401845), mRNA.                             |                        | 0.00371459  | -2.05018 |
| ILMN_1761577 | GPER      | 7  | Homo sapiens G protein-coupled estrogen receptor 1 (GPER), transcript variant 3, mRNA.                                      | LyGPR; DRY12; GPCR-Br; | 0.00845901  | -2.05059 |
| ILMN_1700950 | DLG4      | 17 | Homo sapiens discs, large homolog 4 ( <i>Drosophila</i> ) (DLG4), mRNA.                                                     | SAP90; PSD95           | 0.00197651  | -2.05232 |
| ILMN_1776582 | OGG1      | 3  | Homo sapiens 8-oxoguanine DNA glycosylase (OGG1), nuclear gene encoding mitochondrial protein, transcript variant 2a, mRNA. | HOGG1; MUTM; HMMH; G   | 0.000309685 | -2.05404 |

|              |        |    |                                                                                                                                |                        |             |          |
|--------------|--------|----|--------------------------------------------------------------------------------------------------------------------------------|------------------------|-------------|----------|
| ILMN_1709408 | INPP5D | 2  | Homo sapiens inositol polyphosphate-5-phosphatase, 145kDa (INPP5D), transcript variant 2, mRNA.                                | hp51CN; MGC142140; SH  | 0.00157578  | -2.05876 |
| ILMN_1676520 | ABAT   | 16 | Homo sapiens 4-aminobutyrate aminotransferase (ABAT), nuclear gene encoding mitochondrial protein, transcript variant 2, mRNA. | NPD009; GABAT; GABA-A  | 0.00355307  | -2.05922 |
| ILMN_1735347 | JUNB   | 19 | Homo sapiens jun B proto-oncogene (JUNB), mRNA.                                                                                |                        | 0.00241644  | -2.06014 |
| ILMN_1805225 | METRNL | 17 | Homo sapiens meteorin, glial cell differentiation regulator-like (METRNL), mRNA.                                               | MGC99788               | 0.0127281   | -2.06018 |
| ILMN_1754421 | COL5A1 | 9  | Homo sapiens collagen, type V, alpha 1 (COL5A1), mRNA.                                                                         |                        | 0.00113391  | -2.06056 |
| ILMN_1687315 | OSBPL5 | 11 | Homo sapiens oxysterol binding protein-like 5 (OSBPL5), transcript variant 1, mRNA.                                            | ORP5; FLJ42929; OBPH1  | 0.00417236  | -2.06242 |
| ILMN_1912827 | CCL8   | 17 | Homo sapiens chemokine (C-C motif) ligand 8 (CCL8), mRNA.                                                                      | HC14; MCP2; SCYA10; SC | 2.05E-05    | -2.06327 |
| ILMN_1716979 | CRIP2  | 14 | Homo sapiens cysteine-rich protein 2 (CRIP2), mRNA.                                                                            | CRP2; CRIP; ESP1       | 0.00751787  | -2.06357 |
| ILMN_1742947 | CDH1   | 16 | Homo sapiens cadherin 1, type 1, E-cadherin (epithelial) (CDH1), mRNA.                                                         | CDHE; Arc-1; UVO; CD32 | 0.00769423  | -2.0649  |
| ILMN_1750160 | NUDT6  | 4  | Homo sapiens nudix (nucleoside diphosphate linked moiety X)-type motif 6 (NUDT6), transcript variant 1, mRNA.                  | ASFGE2; gfg-1; FGF-AS; | 0.000307056 | -2.06764 |
| ILMN_1672080 | ADRA1A | 8  | Homo sapiens adrenergic, alpha-1A-, receptor (ADRA1A), transcript variant 2, mRNA.                                             | ADRA1C; ALPHA1AAR; AD  | 0.0160088   | -2.07137 |
| ILMN_2112730 | APOA5  | 11 | Homo sapiens apolipoprotein A-V (APOA5), mRNA.                                                                                 | APOA-V; MGC126838; MC  | 3.32E-05    | -2.07161 |

|              |          |    |                                                                                                             |                       |             |          |
|--------------|----------|----|-------------------------------------------------------------------------------------------------------------|-----------------------|-------------|----------|
| ILMN_1708833 | CCDC102A | 16 | Homo sapiens coiled-coil domain containing 102A (CCDC102A), mRNA.                                           | MGC13119; MGC10992    | 0.00155181  | -2.07423 |
| ILMN_1838949 | EPHB6    | 7  | Homo sapiens EPH receptor B6 (EPHB6), mRNA.                                                                 | MGC129910; MGC129911  | 1.55E-05    | -2.07814 |
| ILMN_1686920 | CD163    | 12 | Homo sapiens CD163 molecule (CD163), transcript variant 2, mRNA.                                            | MM130; M130           | 0.0187019   | -2.07942 |
| ILMN_1693352 | EDN1     | 6  | Homo sapiens endothelin 1 (EDN1), mRNA.                                                                     | ET1                   | 0.000100041 | -2.07975 |
| ILMN_2217809 | HLA-DRB6 | 6  | Homo sapiens major histocompatibility complex, class II, DR beta 6 (pseudogene) (HLA-DRB6) on chromosome 6. |                       | 1.54E-05    | -2.08027 |
| ILMN_1753005 | C1QTNF5  | 11 | Homo sapiens C1q and tumor necrosis factor related protein 5 (C1QTNF5), mRNA.                               | LORD; DKFZp586B0621;  | 0.0400935   | -2.08305 |
| ILMN_1755215 | MYH9     | 22 | Homo sapiens myosin, heavy chain 9, non-muscle (MYH9), mRNA.                                                | NMMHCA; DFNA17; EPST  | 0.000854332 | -2.08353 |
| ILMN_1725510 | JAM3     | 11 | Homo sapiens junctional adhesion molecule 3 (JAM3), mRNA.                                                   | FLJ14529; JAMC; JAM-C | 0.00393452  | -2.08378 |
| ILMN_1715543 | TRO      | X  | Homo sapiens trophinin (TRO), transcript variant 6, mRNA.                                                   | KIAA1114; MAGE-d3; MA | 0.00754805  | -2.08437 |
| ILMN_1795976 | LAMC1    | 1  | Homo sapiens laminin, gamma 1 (formerly LAMB2) (LAMC1), mRNA.                                               | LAMB2; MGC87297       | 0.00152677  | -2.08455 |
| ILMN_1751086 | CBR3     | 21 | Homo sapiens carbonyl reductase 3 (CBR3), mRNA.                                                             | hCBR3                 | 0.00080383  | -2.08543 |
| ILMN_2218002 |          |    | BX097190 Soares placenta Nb2HP Homo sapiens cDNA clone IMAGp998G19212, mRNA sequence                        |                       | 0.0306253   | -2.08579 |
| ILMN_2155480 | ZNF529   | 19 | Homo sapiens zinc finger protein 529 (ZNF529), mRNA.                                                        | KIAA1615              | 0.0229306   | -2.08778 |

|              |         |    |                                                                                                               |                         |             |          |
|--------------|---------|----|---------------------------------------------------------------------------------------------------------------|-------------------------|-------------|----------|
| ILMN_2069224 | ADAMTS1 | 21 | Homo sapiens ADAM metallopeptidase with thrombospondin type 1 motif, 1 (ADAMTS1), mRNA.                       | KIAA1346; C3-C5; METH   | 0.0226189   | -2.08893 |
| ILMN_1696432 | MRPL20  | 1  | Homo sapiens mitochondrial ribosomal protein L20 (MRPL20), nuclear gene encoding mitochondrial protein, mRNA. | MGC4779; L20mt; MGC7    | 0.0148317   | -2.08936 |
| ILMN_2366714 | PLEK    | 2  | Homo sapiens pleckstrin (PLEK), mRNA.                                                                         | P47; FLJ27168           | 0.00160014  | -2.09076 |
| ILMN_2406654 | TAP1    | 6  | Homo sapiens transporter 1, ATP-binding cassette, sub-family B (MDR/TAP) (TAP1), mRNA.                        | ABC17; PSF1; FLJ26666;  | 0.00394114  | -2.09198 |
| ILMN_1679929 | CX3CL1  | 16 | Homo sapiens chemokine (C-X3-C motif) ligand 1 (CX3CL1), mRNA.                                                | NTN; CXC3C; NTT; fracta | 2.55E-05    | -2.09342 |
| ILMN_1802257 | LSP1    | 11 | Homo sapiens lymphocyte-specific protein 1 (LSP1), transcript variant 2, mRNA.                                | WP34; pp52              | 0.00477512  | -2.09385 |
| ILMN_2357334 | LIPC    | 15 | Homo sapiens lipase, hepatic (LIPC), mRNA.                                                                    | LIPH; HL; HTGL          | 0.01906     | -2.09474 |
| ILMN_1749751 | NUDT6   | 4  | Homo sapiens nudix (nucleoside diphosphate linked moiety X)-type motif 6 (NUDT6), transcript variant 1, mRNA. | ASFGF2; gfg-1; FGF-AS;  | 0.000489304 | -2.09539 |
| ILMN_1783469 | INHBE   | 12 | Homo sapiens inhibin, beta E (INHBE), mRNA.                                                                   | MGC4638                 | 0.00698095  | -2.09614 |
| ILMN_1687440 | MTHFS   | 15 | Homo sapiens 5,10-methenyltetrahydrofolate synthetase (5-formyltetrahydrofolate cyclo-ligase) (MTHFS), mRNA.  | HsT19268                | 0.00181516  | -2.09657 |
| ILMN_1805922 | PLXNA1  | 3  | Homo sapiens plexin A1 (PLXNA1), mRNA.                                                                        | NOV; PLXN1; NOVp; PLEX  | 0.0133646   | -2.09754 |

|              |           |    |                                                                                                                                 |                        |             |          |
|--------------|-----------|----|---------------------------------------------------------------------------------------------------------------------------------|------------------------|-------------|----------|
| ILMN_1668055 | PLAGL1    | 6  | Homo sapiens pleiomorphic adenoma gene-like 1 (PLAGL1), transcript variant 3, mRNA.                                             | MGC126276; LOT1; ZAC;  | 0.0008995   | -2.09966 |
| ILMN_1722622 | PDE5A     | 4  | Homo sapiens phosphodiesterase 5A, cGMP-specific (PDE5A), transcript variant 1, mRNA.                                           | CGB-PDE; PDE5; PDE5A1  | 0.0114276   | -2.10455 |
| ILMN_1690371 | ADRA1A    | 8  | Homo sapiens adrenergic, alpha-1A-, receptor (ADRA1A), transcript variant 3, mRNA.                                              | ADRA1C; ALPHA1AAR; AD  | 3.11E-06    | -2.10464 |
| ILMN_1725692 | ADAMTS5   | 21 | Homo sapiens ADAM metalloproteinase with thrombospondin type 1 motif, 5 (aggrecanase-2) (ADAMTS5), mRNA.                        | ADAMTS11; FLJ36738; AD | 1.25E-05    | -2.10992 |
| ILMN_2346831 | HBA2      | 16 | Homo sapiens hemoglobin, alpha 2 (HBA2), mRNA.                                                                                  | HBA1                   | 0.000141286 | -2.11101 |
| ILMN_1733270 | UGDH      | 4  | Homo sapiens UDP-glucose dehydrogenase (UGDH), mRNA.                                                                            | UDPGDH; UGD; UDP-GlcE  | 0.000464545 | -2.11138 |
| ILMN_2379599 | HBB       | 11 | Homo sapiens hemoglobin, beta (HBB), mRNA.                                                                                      | HBD; CD113t-C          | 0.00231483  | -2.11201 |
| ILMN_1735367 | LOC648470 |    | PREDICTED: Homo sapiens similar to Caspase-4 precursor (CASP-4) (ICH-2 protease) (TX protease) (ICE(rel)-II) (LOC648470), mRNA. |                        | 0.0214233   | -2.1157  |
| ILMN_1816634 | PACS1     | 11 | Homo sapiens phosphofurin acidic cluster sorting protein 1 (PACS1), mRNA.                                                       | FLJ10209; KIAA1175     | 0.0438303   | -2.11772 |
| ILMN_1727815 | TPM4      | 19 | Homo sapiens tropomyosin 4 (TPM4), mRNA.                                                                                        |                        | 0.00508228  | -2.11876 |
| ILMN_1751072 | PDE1A     | 2  | Homo sapiens phosphodiesterase 1A, calmodulin-dependent (PDE1A), transcript variant 2, mRNA.                                    | HSPDE1A; MGC26303; H   | 0.00143711  | -2.11897 |

|              |           |    |                                                                                      |                         |             |          |
|--------------|-----------|----|--------------------------------------------------------------------------------------|-------------------------|-------------|----------|
| ILMN_1750496 | PFDN6     | 6  | Homo sapiens prefoldin subunit 6 (PFDN6), mRNA.                                      | HKE2; PFD6; H2-KE2; KE  | 0.0112528   | -2.12046 |
| ILMN_2341724 | HKDC1     | 10 | Homo sapiens hexokinase domain containing 1 (HKDC1), mRNA.                           | MGC125688; FLJ37767; F  | 0.00110783  | -2.12154 |
| ILMN_1737683 | CLEC11A   | 19 | Homo sapiens C-type lectin domain family 11, member A (CLEC11A), mRNA.               | LSLCL; P47; SCGF; CLEC  | 0.000583539 | -2.12216 |
| ILMN_1706873 | LRG1      | 19 | Homo sapiens leucine-rich alpha-2-glycoprotein 1 (LRG1), mRNA.                       | HMFT1766; LRG           | 3.58E-05    | -2.12305 |
| ILMN_1799579 | GYPC      | 2  | Homo sapiens glycophorin C (Gerbich blood group) (GYPC), transcript variant 2, mRNA. | MGC126191; GE; CD236F   | 0.000226659 | -2.12329 |
| ILMN_1741096 | MCEE      | 2  | Homo sapiens methylmalonyl CoA epimerase (MCEE), mRNA.                               | GLOD2                   | 0.00348302  | -2.12471 |
| ILMN_1662942 | ROR2      | 9  | Homo sapiens receptor tyrosine kinase-like orphan receptor 2 (ROR2), mRNA.           | BDB; BDB1; MGC163394    | 0.0190925   | -2.12499 |
| ILMN_1714197 | EPHB1     | 3  | Homo sapiens EPH receptor B1 (EPHB1), mRNA.                                          | Hek6; EPHT2; NET; FLJ37 | 0.0194486   | -2.12507 |
| ILMN_1691526 | C20orf3   | 20 | Homo sapiens chromosome 20 open reading frame 3 (C20orf3), mRNA.                     | BSCv; APMAP             | 4.98E-05    | -2.126   |
| ILMN_1733374 | PTPN3     | 9  | Homo sapiens protein tyrosine phosphatase, non-receptor type 3 (PTPN3), mRNA.        | DKFZp686N0569; PTPH1    | 0.000947137 | -2.12693 |
| ILMN_1678173 | LOC134145 | 5  | Homo sapiens hypothetical protein LOC134145 (LOC134145), mRNA.                       | FLJ20667                | 0.0395328   | -2.12777 |
| ILMN_2372915 | ZNF789    | 7  | Homo sapiens zinc finger protein 789 (ZNF789), transcript variant 1, mRNA.           |                         | 0.000749259 | -2.12843 |
| ILMN_2113490 | C21orf63  | 21 | Homo sapiens chromosome 21 open reading frame 63 (C21orf63), mRNA.                   | PRED34; B19; SUE21; B1  | 8.69E-05    | -2.13064 |
| ILMN_2244841 | 6-Sep     | X  | Homo sapiens septin 6 (SEPT6), transcript variant I, mRNA.                           | SEP2; RP5-876A24.2; MG  | 0.0056184   | -2.13118 |

|              |          |    |                                                                                                                  |                         |             |          |
|--------------|----------|----|------------------------------------------------------------------------------------------------------------------|-------------------------|-------------|----------|
| ILMN_1690252 | FER1L3   | 10 | Homo sapiens fer-1-like 3, myoferlin (C. elegans) (FER1L3), transcript variant 1, mRNA.                          | FLJ36571; FLJ90777; MYO | 0.00203854  | -2.1327  |
| ILMN_1843721 | ADFP     | 9  | Homo sapiens adipose differentiation-related protein (ADFP), mRNA.                                               | ADRP; MGC10598          | 0.00954343  | -2.13325 |
| ILMN_1764175 | C1orf116 | 1  | Homo sapiens chromosome 1 open reading frame 116 (C1orf116), mRNA.                                               | MGC4309; DKFZp666H20    | 0.0186892   | -2.1333  |
| ILMN_1750658 |          |    | PREDICTED: Homo sapiens hypothetical LOC400043 (LOC400043), mRNA                                                 |                         | 0.000617485 | -2.13442 |
| ILMN_2075334 | FNDC1    | 6  | Homo sapiens fibronectin type III domain containing 1 (FNDC1), mRNA.                                             | bA243O10.1; AGS8; RP1   | 0.000400751 | -2.13524 |
| ILMN_1772123 | KLF2     | 19 | Homo sapiens Kruppel-like factor 2 (lung) (KLF2), mRNA.                                                          | LKLF                    | 0.00633638  | -2.13546 |
| ILMN_1655051 | GPR109B  |    | PREDICTED: Homo sapiens G protein-coupled receptor 109B, transcript variant 3 (GPR109B), mRNA.                   |                         | 0.00211538  | -2.13663 |
| ILMN_2337923 | C3orf23  | 3  | Homo sapiens chromosome 3 open reading frame 23 (C3orf23), transcript variant 3, mRNA.                           | MGC119533; MGC119530    | 0.00158288  | -2.1377  |
| ILMN_2049693 | PC       | 11 | Homo sapiens pyruvate carboxylase (PC), nuclear gene encoding mitochondrial protein, transcript variant A, mRNA. | PCB                     | 0.000125263 | -2.13777 |
| ILMN_1651987 | SAA1     | 11 | Homo sapiens serum amyloid A1 (SAA1), transcript variant 1, mRNA.                                                | MGC111216; SAA; PIG4;   | 0.0229625   | -2.13814 |
| ILMN_1682812 | S100A9   | 1  | Homo sapiens S100 calcium binding protein A9 (calgranulin B) (S100A9), mRNA.                                     | CFAG; MAC387; 60B8AG;   | 1.34E-05    | -2.13949 |
| ILMN_2189424 | PZP      | 12 | Homo sapiens pregnancy-zone protein (PZP), mRNA.                                                                 | CPAMD6; MGC133093       | 0.000208143 | -2.14284 |

|              |           |    |                                                                                                           |                         |             |          |
|--------------|-----------|----|-----------------------------------------------------------------------------------------------------------|-------------------------|-------------|----------|
| ILMN_1710315 | CD34      | 1  | Homo sapiens CD34 molecule (CD34), transcript variant 2, mRNA.                                            |                         | 3.63E-05    | -2.14491 |
| ILMN_1717294 | GPR128    | 3  | Homo sapiens G protein-coupled receptor 128 (GPR128), mRNA.                                               | MGC163260; FLJ29035; M  | 0.00206714  | -2.14538 |
| ILMN_1687864 | MOBKL2B   | 9  | Homo sapiens MOB1, Mps One Binder kinase activator-like 2B (yeast) (MOBKL2B), mRNA.                       | FLJ13204; FLJ23916; MO  | 0.00342477  | -2.1473  |
| ILMN_2349444 | ABI3BP    | 3  | Homo sapiens ABI gene family, member 3 (NESH) binding protein (ABI3BP), mRNA.                             | FLJ41743; FLJ41754; TAF | 0.00383246  | -2.14851 |
| ILMN_1727091 | ZNF532    | 18 | Homo sapiens zinc finger protein 532 (ZNF532), mRNA.                                                      | FLJ10697                | 0.000416606 | -2.14862 |
| ILMN_1732538 | ZBTB16    | 11 | Homo sapiens zinc finger and BTB domain containing 16 (ZBTB16), transcript variant 2, mRNA.               | PLZF; ZNF145            | 0.0397455   | -2.14907 |
| ILMN_1670117 | MT1G      | 16 | Homo sapiens metallothionein 1G (MT1G), mRNA.                                                             | MT1; MT1K; MGC12386     | 0.000161988 | -2.1497  |
| ILMN_2311089 | LOC651621 |    | PREDICTED: Homo sapiens similar to hydroxysteroid (17-beta) dehydrogenase 7 (LOC651621), mRNA.            |                         | 0.00319861  | -2.1512  |
| ILMN_1669881 | CSAG3B    |    | Homo sapiens CSAG family, member 3B (CSAG3B), mRNA.                                                       | CSAG2                   | 0.0480861   | -2.15319 |
| ILMN_1736888 | CLIP3     | 19 | Homo sapiens CAP-GLY domain containing linker protein 3 (CLIP3), mRNA.                                    | RSNL1; CLIPR-59; CLIPR  | 0.0034469   | -2.16071 |
| ILMN_1716237 | PDE1A     | 2  | Homo sapiens phosphodiesterase 1A, calmodulin-dependent (PDE1A), transcript variant 2, mRNA.              | HSPDE1A; MGC26303; H    | 0.00935529  | -2.1614  |
| ILMN_1702168 | LOC653506 | 17 | PREDICTED: Homo sapiens similar to meteorin, glial cell differentiation regulator-like (LOC653506), mRNA. |                         | 0.000523211 | -2.16261 |



|              |          |    |                                                                                                                                                 |                         |             |          |
|--------------|----------|----|-------------------------------------------------------------------------------------------------------------------------------------------------|-------------------------|-------------|----------|
| ILMN_1657760 | PDLIM3   | 4  | Homo sapiens PDZ and LIM domain 3 (PDLIM3), mRNA.                                                                                               | DKFZp686L0362; ALP      | 0.0491863   | -2.16575 |
| ILMN_1785336 | SCRN1    | 7  | Homo sapiens secernin 1 (SCRN1), mRNA.                                                                                                          | SES1; KIAA0193          | 0.00403005  | -2.16704 |
| ILMN_1713008 | PTPN13   | 4  | Homo sapiens protein tyrosine phosphatase, non-receptor type 13 (APO-1/CD95 (Fas)-associated phosphatase) (PTPN13), transcript variant 3, mRNA. | PTP1E; PNP1; PTP-BL; PT | 0.00534155  | -2.16717 |
| ILMN_1681520 | CCL23    | 17 | Homo sapiens chemokine (C-C motif) ligand 23 (CCL23), transcript variant CKbeta8-1, mRNA.                                                       | Ckb-8-1; CKb8; CK-BETA  | 0.00161339  | -2.16732 |
| ILMN_1758173 | MYH10    | 17 | Homo sapiens myosin, heavy chain 10, non-muscle (MYH10), mRNA.                                                                                  | NMMHCB; MGC134914; M    | 0.000581643 | -2.17216 |
| ILMN_1790228 | AHSG     | 3  | Homo sapiens alpha-2-HS-glycoprotein (AHSG), mRNA.                                                                                              | HSGA; A2HS; AHS; FETU   | 0.0174384   | -2.17327 |
| ILMN_2355971 | DOCK10   | 2  | Homo sapiens dedicator of cytokinesis 10 (DOCK10), mRNA.                                                                                        | Nbla10300; DKFZp781A1   | 0.0378765   | -2.17442 |
| ILMN_1811767 | KCTD12   | 13 | Homo sapiens potassium channel tetramerisation domain containing 12 (KCTD12), mRNA.                                                             | FLJ33073; KIAA1778; C1  | 0.0237916   | -2.17459 |
| ILMN_1790781 | LEPR     | 1  | Homo sapiens leptin receptor (LEPR), transcript variant 1, mRNA.                                                                                | OBR; CD295              | 0.0178883   | -2.17821 |
| ILMN_2070815 | OLFML3   | 1  | Homo sapiens olfactomedin-like 3 (OLFML3), mRNA.                                                                                                | OLF44; HNOEL-iso        | 0.000529852 | -2.17909 |
| ILMN_1681938 | PAM      | 5  | Homo sapiens peptidylglycine alpha-amidating monooxygenase (PAM), transcript variant 3, mRNA.                                                   | PHM; PAL                | 0.0306314   | -2.18023 |
| ILMN_1724293 | PPP1R15A | 19 | Homo sapiens protein phosphatase 1, regulatory (inhibitor) subunit 15A (PPP1R15A), mRNA.                                                        | GADD34                  | 0.00326256  | -2.18092 |

|              |         |    |                                                                                                                                                  |                        |             |          |
|--------------|---------|----|--------------------------------------------------------------------------------------------------------------------------------------------------|------------------------|-------------|----------|
| ILMN_2090782 | S100A4  | 1  | Homo sapiens S100 calcium binding protein A4 (S100A4), transcript variant 2, mRNA.                                                               | FSP1; MTS1; 18A2; PEL9 | 0.00179798  | -2.18155 |
| ILMN_2054392 | TTYH1   | 19 | Homo sapiens tweety homolog 1 (Drosophila) (TTYH1), transcript variant 1, mRNA.                                                                  |                        | 0.000577895 | -2.18167 |
| ILMN_1653871 | DPH5    | 1  | Homo sapiens DPH5 homolog (S. cerevisiae) (DPH5), transcript variant 1, mRNA.                                                                    | MGC61450; AD-018; NPD  | 0.00116093  | -2.18311 |
| ILMN_1779841 | ALDH4A1 | 1  | Homo sapiens aldehyde dehydrogenase 4 family, member A1 (ALDH4A1), nuclear gene encoding mitochondrial protein, transcript variant P5CDhL, mRNA. | P5CDh; P5CD; ALDH4; P5 | 0.0117734   | -2.19271 |
| ILMN_1723607 | DKK3    | 11 | Homo sapiens dickkopf homolog 3 (Xenopus laevis) (DKK3), transcript variant 2, mRNA.                                                             | REIC                   | 0.00255322  | -2.19388 |
| ILMN_1669409 |         |    | BX109986 Soares fetal liver spleen 1NFLS Homo sapiens cDNA clone IMAGp998K14124, mRNA sequence                                                   |                        | 0.00458558  | -2.19722 |
| ILMN_1749996 | SFXN2   | 10 | Homo sapiens sideroflexin 2 (SFXN2), mRNA.                                                                                                       |                        | 0.00253684  | -2.19919 |
| ILMN_1757134 | DDEF2   | 2  | Homo sapiens development and differentiation enhancing factor 2 (DDEF2), mRNA.                                                                   | PAG3; Pap-alpha; SHAG1 | 0.01459     | -2.20674 |
| ILMN_1700268 | EGR1    | 5  | Homo sapiens early growth response 1 (EGR1), mRNA.                                                                                               | GOS30; AT225; TIS8; ZN | 0.0358255   | -2.20734 |
| ILMN_1771348 | FNDC1   | 6  | Homo sapiens fibronectin type III domain containing 1 (FNDC1), mRNA.                                                                             | bA243010.1; AGS8; RP1  | 8.79E-06    | -2.20772 |
| ILMN_1802894 | ATP1B3  |    | PREDICTED: Homo sapiens ATPase, Na <sup>+</sup> /K <sup>+</sup> transporting, beta 3 polypeptide, transcript variant 2 (ATP1B3), mRNA.           |                        | 4.79E-05    | -2.20837 |

|              |          |    |                                                                                                                            |                         |             |          |
|--------------|----------|----|----------------------------------------------------------------------------------------------------------------------------|-------------------------|-------------|----------|
| ILMN_1737943 | PMP22    | 17 | Homo sapiens peripheral myelin protein 22 (PMP22), transcript variant 2, mRNA.                                             | CMT1A; GAS-3; DSS; CM   | 0.00387616  | -2.20917 |
| ILMN_1654109 | CHD3     | 17 | Homo sapiens chromodomain helicase DNA binding protein 3 (CHD3), transcript variant 1, mRNA.                               | Mi2-ALPHA; Mi-2a; ZFH   | 0.000562178 | -2.21224 |
| ILMN_2073604 | EPHA3    | 3  | Homo sapiens EPH receptor A3 (EPHA3), transcript variant 1, mRNA.                                                          | HEK4; ETK1; HEK; TYRO4  | 0.00762257  | -2.21375 |
| ILMN_1744244 | HLA-DRB3 | 6  | Homo sapiens major histocompatibility complex, class II, DR beta 3 (HLA-DRB3), mRNA.                                       | MGC117330; HLA-DR3B     | 0.00763141  | -2.21386 |
| ILMN_1690282 | RHBDF1   | 16 | Homo sapiens rhomboid 5 homolog 1 (Drosophila) (RHBDF1), mRNA.                                                             | gene -90; gene -89; C16 | 0.00112942  | -2.21513 |
| ILMN_1731044 | CDR2L    | 17 | Homo sapiens cerebellar degeneration-related protein 2-like (CDR2L), mRNA.                                                 | HUMPPA                  | 3.30E-05    | -2.21515 |
| ILMN_2212763 | LAT      | 16 | Homo sapiens linker for activation of T cells (LAT), transcript variant 2, mRNA.                                           | pp36; LAT1              | 0.00669875  | -2.21586 |
| ILMN_1786024 | CD74     | 5  | Homo sapiens CD74 molecule, major histocompatibility complex, class II invariant chain (CD74), transcript variant 1, mRNA. | Ia-GAMMA; DHLAG; HLA    | 0.000551301 | -2.21711 |
| ILMN_1652161 | IL1R2    | 2  | Homo sapiens interleukin 1 receptor, type II (IL1R2), transcript variant 2, mRNA.                                          | IL1RB; CD121b; MGC477   | 0.000207181 | -2.21792 |
| ILMN_1798971 | CMTM7    | 3  | Homo sapiens CKLF-like MARVEL transmembrane domain containing 7 (CMTM7), transcript variant 2, mRNA.                       | CKLFSF7; FLJ30992       | 0.000752429 | -2.218   |
| ILMN_2366972 |          |    | AGENCOURT_10400346 NIH_MGC_82 Homo sapiens cDNA clone IMAGE:6616124 5, mRNA sequence                                       |                         | 0.000983118 | -2.21849 |

|              |          |    |                                                                                                                                         |                         |             |          |
|--------------|----------|----|-----------------------------------------------------------------------------------------------------------------------------------------|-------------------------|-------------|----------|
| ILMN_1765971 | COL5A2   | 2  | Homo sapiens collagen, type V, alpha 2 (COL5A2), mRNA.                                                                                  | MGC105115               | 0.00110371  | -2.21865 |
| ILMN_1789003 | MVK      | 12 | Homo sapiens mevalonate kinase (mevalonic aciduria) (MVK), mRNA.                                                                        | MVLK; LRPB              | 0.00119784  | -2.22324 |
| ILMN_1755974 | METRNL   |    | PREDICTED: Homo sapiens meteorin, glial cell differentiation regulator-like (METRNL), mRNA.                                             |                         | 0.0229111   | -2.22452 |
| ILMN_1909886 | MGC4677  | 2  | Homo sapiens hypothetical protein MGC4677 (MGC4677), mRNA.                                                                              | MGC17532; MGC88182      | 0.000364615 | -2.22559 |
| ILMN_1811345 | CASP1    | 11 | Homo sapiens caspase 1, apoptosis-related cysteine peptidase (interleukin 1, beta, convertase) (CASP1), transcript variant delta, mRNA. | IL1BC; ICE; P45         | 0.0429803   | -2.22735 |
| ILMN_1684585 | ARHGEF10 | 8  | Homo sapiens Rho guanine nucleotide exchange factor (GEF) 10 (ARHGEF10), mRNA.                                                          | GEF10; DKFZp686H0726    | 3.35E-05    | -2.22772 |
| ILMN_1787556 | ITGA2    | 5  | Homo sapiens integrin, alpha 2 (CD49B, alpha 2 subunit of VLA-2 receptor) (ITGA2), mRNA.                                                | CD49B; VLAA2; VLA-2; B  | 0.0161056   | -2.2293  |
| ILMN_1686989 | C9       | 5  | Homo sapiens complement component 9 (C9), mRNA.                                                                                         |                         | 0.00467219  | -2.22943 |
| ILMN_1766657 | AMICA1   | 11 | Homo sapiens adhesion molecule, interacts with CXADR antigen 1 (AMICA1), mRNA.                                                          | MGC118814; AMICA; FLJ   | 0.000537793 | -2.22963 |
| ILMN_1688041 | SYT15    | 10 | Homo sapiens synaptotagmin XV (SYT15), transcript variant b, mRNA.                                                                      | sytXV; CHR10SYT; syt XV | 4.81E-05    | -2.23076 |
| ILMN_1710124 |          |    | Homo sapiens mRNA; cDNA DKFZp686J0156 (from clone DKFZp686J0156)                                                                        |                         | 0.0155125   | -2.23335 |
| ILMN_1700695 | VEGFB    | 11 | Homo sapiens vascular endothelial growth factor B (VEGFB), mRNA.                                                                        | VRF; VEGFL              | 0.000611587 | -2.23377 |

|              |           |    |                                                                                                    |                        |             |          |
|--------------|-----------|----|----------------------------------------------------------------------------------------------------|------------------------|-------------|----------|
| ILMN_1784380 | 3-Mar     |    | PREDICTED: Homo sapiens membrane-associated ring finger (C3HC4) 3 (MARCH3), mRNA.                  |                        | 0.00208102  | -2.23614 |
| ILMN_2095653 | RGS10     | 10 | Homo sapiens regulator of G-protein signaling 10 (RGS10), transcript variant 1, mRNA.              |                        | 0.0147793   | -2.23674 |
| ILMN_1696099 | CPXM2     | 10 | Homo sapiens carboxypeptidase X (M14 family), member 2 (CPXM2), mRNA.                              | UNQ676                 | 0.0031561   | -2.24246 |
| ILMN_1673681 | CYGB      | 17 | Homo sapiens cytoglobin (CYGB), mRNA.                                                              | HGB; STAP              | 0.00112379  | -2.24414 |
| ILMN_1663351 | ADK       | 10 | Homo sapiens adenosine kinase (ADK), transcript variant ADK-short, mRNA.                           | AK                     | 0.000100338 | -2.24492 |
| ILMN_1665192 | IL1B      | 2  | Homo sapiens interleukin 1, beta (IL1B), mRNA.                                                     | IL1F2; IL1-BETA; IL-1  | 0.00188432  | -2.24661 |
| ILMN_1786105 | C13orf33  | 13 | Homo sapiens chromosome 13 open reading frame 33 (C13orf33), mRNA.                                 | MGC126673; MGC126675   | 0.00179509  | -2.24831 |
| ILMN_1770048 | LOC650369 |    | PREDICTED: Homo sapiens similar to family with sequence similarity 60, member A (LOC650369), mRNA. |                        | 8.15E-08    | -2.24986 |
| ILMN_1803194 | REC8      | 14 | Homo sapiens REC8 homolog (yeast) (REC8), transcript variant 1, mRNA.                              | HR21spB; REC8; MGC950  | 0.0171849   | -2.25296 |
| ILMN_2406557 | CXCL13    | 4  | Homo sapiens chemokine (C-X-C motif) ligand 13 (B-cell chemoattractant) (CXCL13), mRNA.            | SCYB13; ANGIE; BCA1; A | 0.000624707 | -2.25366 |
| ILMN_2383349 | MT1B      | 16 | Homo sapiens metallothionein 1B (MT1B), mRNA.                                                      | MTP; MT1; MT1Q         | 0.000260885 | -2.2543  |
| ILMN_1682957 | MAPRE1    | 20 | Homo sapiens microtubule-associated protein, RP/EB family, member 1 (MAPRE1), mRNA.                | EB1; MGC129946; MGC1   | 0.000640076 | -2.25557 |

|              |         |    |                                                                                                         |                         |             |          |
|--------------|---------|----|---------------------------------------------------------------------------------------------------------|-------------------------|-------------|----------|
| ILMN_1810560 | HYOU1   | 11 | Homo sapiens hypoxia up-regulated 1 (HYOU1), mRNA.                                                      | DKFZp686N08236; ORP1    | 0.0410531   | -2.25825 |
| ILMN_1715680 | MOGAT1  | 2  | Homo sapiens monoacylglycerol O-acyltransferase 1 (MOGAT1), mRNA.                                       | DGAT2L1; DGAT2L; MGA    | 0.0105934   | -2.25838 |
| ILMN_1751753 | F13A1   | 6  | Homo sapiens coagulation factor XIII, A1 polypeptide (F13A1), mRNA.                                     | F13A                    | 0.000234231 | -2.25947 |
| ILMN_1651950 | SAA2    | 11 | Homo sapiens serum amyloid A2 (SAA2), mRNA.                                                             |                         | 0.00146212  | -2.26397 |
| ILMN_1763523 | ANXA11  | 10 | Homo sapiens annexin A11 (ANXA11), transcript variant a, mRNA.                                          | CAP50; ANX11            | 0.000109949 | -2.26494 |
| ILMN_1764321 | FZD5    | 2  | Homo sapiens frizzled homolog 5 (Drosophila) (FZD5), mRNA.                                              | DKFZP434E2135; C2orf3   | 0.000152444 | -2.26511 |
| ILMN_1782237 | MOXD1   | 6  | Homo sapiens monooxygenase, DBH-like 1 (MOXD1), transcript variant 2, mRNA.                             | MOX; dJ248E1.1; PRO578  | 2.09E-06    | -2.26548 |
| ILMN_1769158 | ADORA3  | 1  | Homo sapiens adenosine A3 receptor (ADORA3), transcript variant 3, mRNA.                                | AD026; RP11-552M11.7;   | 0.0221563   | -2.26562 |
| ILMN_1748915 | MICAL1  | 6  | Homo sapiens microtubule associated monooxygenase, calponin and LIM domain containing 1 (MICAL1), mRNA. | NICAL; DKFZp434B1517;   | 0.0103228   | -2.26688 |
| ILMN_1704656 | FAM129A | 1  | Homo sapiens family with sequence similarity 129, member A (FAM129A), transcript variant 2, mRNA.       | NIBAN; FLJ38228; C1orf2 | 0.00651254  | -2.26712 |
| ILMN_1672589 | STEAP1  |    | PREDICTED: Homo sapiens six transmembrane epithelial antigen of the prostate 1 (STEAP1), mRNA.          |                         | 0.00524691  | -2.26717 |
| ILMN_1663640 |         |    | nae09h04.x1 NCI_CGAP_OV18 Homo sapiens cDNA clone IMAGE:3435102 3, mRNA sequence                        |                         | 0.00247416  | -2.26976 |

|              |           |    |                                                                                                              |                         |             |          |
|--------------|-----------|----|--------------------------------------------------------------------------------------------------------------|-------------------------|-------------|----------|
| ILMN_1795906 | GDPD3     | 16 | Homo sapiens glycerophosphodiester phosphodiesterase domain containing 3 (GDPD3), mRNA.                      | FLJ22603; MGC4171       | 0.000324381 | -2.27241 |
| ILMN_1732750 | DUSP5     | 10 | Homo sapiens dual specificity phosphatase 5 (DUSP5), mRNA.                                                   | HVH3; DUSP              | 6.01E-05    | -2.27329 |
| ILMN_1652722 | SEC61A2   | 10 | Homo sapiens Sec61 alpha 2 subunit ( <i>S. cerevisiae</i> ) (SEC61A2), mRNA.                                 | FLJ10578                | 0.00301018  | -2.27438 |
| ILMN_1668460 | LIPG      | 18 | Homo sapiens lipase, endothelial (LIPG), mRNA.                                                               | EL; PRO719; EDL         | 0.000950616 | -2.27588 |
| ILMN_1692261 | CRIP1     | 14 | Homo sapiens cysteine-rich protein 1 (intestinal) (CRIP1), mRNA.                                             | CRIP; CRP1; CRHP        | 0.000909894 | -2.27713 |
| ILMN_1699987 | PTRF      | 17 | Homo sapiens polymerase I and transcript release factor (PTRF), mRNA.                                        | FKSG13                  | 5.20E-06    | -2.27883 |
| ILMN_1815102 | TMEM51    | 1  | Homo sapiens transmembrane protein 51 (TMEM51), mRNA.                                                        | FLJ10199; C1orf72       | 0.0192406   | -2.27926 |
| ILMN_2331636 | FGD3      | 9  | Homo sapiens FYVE, RhoGEF and PH domain containing 3 (FGD3), transcript variant 2, mRNA.                     | MGC117260; FLJ00004; 2  | 0.0118203   | -2.28136 |
| ILMN_2358626 | LPAL2     | 6  | Homo sapiens lipoprotein, Lp(a)-like 2 (LPAL2), transcript variant 2, mRNA.                                  | RP11-7209.2; MGC12953   | 6.57E-05    | -2.28321 |
| ILMN_1806561 | LOC641825 |    | PREDICTED: Homo sapiens hypothetical protein LOC641825 (LOC641825), mRNA.                                    |                         | 0.000193764 | -2.28856 |
| ILMN_1737308 | PRTN3     | 19 | Homo sapiens proteinase 3 (serine proteinase, neutrophil, Wegener granulomatosis autoantigen) (PRTN3), mRNA. | P29; MBT; AGP7; PR-3; C | 4.70E-05    | -2.29014 |
| ILMN_1760506 | NIN       | 14 | Homo sapiens ninein (GSK3B interacting protein) (NIN), transcript variant 2, mRNA.                           | KIAA1565                | 0.00328394  | -2.29395 |
| ILMN_1743711 | DOCK4     | 7  | Homo sapiens dedicator of cytokinesis 4 (DOCK4), mRNA.                                                       | MGC134911; FLJ34238; M  | 8.76E-05    | -2.29555 |

|              |           |    |                                                                                                     |                        |             |          |
|--------------|-----------|----|-----------------------------------------------------------------------------------------------------|------------------------|-------------|----------|
| ILMN_1662768 | PDLIM3    | 4  | Homo sapiens PDZ and LIM domain 3 (PDLIM3), mRNA.                                                   | DKFZp686L0362; ALP     | 1.22E-05    | -2.29868 |
| ILMN_1815261 | C13orf1   | 13 | Homo sapiens chromosome 13 open reading frame 1 (C13orf1), mRNA.                                    | CLLD6                  | 0.0182459   | -2.29964 |
| ILMN_1783337 | GPR56     | 16 | Homo sapiens G protein-coupled receptor 56 (GPR56), transcript variant 3, mRNA.                     | BFPP; DKFZp781L1398; T | 0.00295864  | -2.29985 |
| ILMN_2336595 | FURIN     | 15 | Homo sapiens furin (paired basic amino acid cleaving enzyme) (FURIN), mRNA.                         | PACE; FUR; SPC1; PCSK3 | 0.016526    | -2.30586 |
| ILMN_1668219 | ABHD6     | 3  | Homo sapiens abhydrolase domain containing 6 (ABHD6), mRNA.                                         |                        | 0.00297308  | -2.30841 |
| ILMN_1801044 | FRZB      | 2  | Homo sapiens frizzled-related protein (FRZB), mRNA.                                                 | FRZB-1; FRZB-PEN; SRF  | 0.00809353  | -2.31608 |
| ILMN_1909468 | GRRP1     | 1  | Homo sapiens glycine/arginine rich protein 1 (GRRP1), mRNA.                                         | RP11-96L14.5; FLJ14050 | 0.000249021 | -2.31831 |
| ILMN_1654064 | MTE       |    | Homo sapiens metallothionein E (MTE), mRNA.                                                         | MT11                   | 0.00689114  | -2.3272  |
| ILMN_1661599 | SLC25A30  | 13 | Homo sapiens solute carrier family 25, member 30 (SLC25A30), mRNA.                                  | KMCP1                  | 0.00951052  | -2.334   |
| ILMN_1754137 | IGFBP7    | 4  | Homo sapiens insulin-like growth factor binding protein 7 (IGFBP7), mRNA.                           | MAC25; IGFBP-7; IGFBP- | 0.0305795   | -2.33688 |
| ILMN_1711314 | DGAT2     | 11 | Homo sapiens diacylglycerol O-acyltransferase homolog 2 (mouse) (DGAT2), mRNA.                      | HMFN1045; DKFZp686A1   | 0.000238183 | -2.34309 |
| ILMN_1782429 | RABEPK    | 9  | Homo sapiens Rab9 effector protein with kelch motifs (RABEPK), mRNA.                                | bA65N13.1; DKFZp686P1  | 0.000837002 | -2.3431  |
| ILMN_1787526 | LOC649495 |    | PREDICTED: Homo sapiens similar to Alpha-tocopherol transfer protein (Alpha-TTP) (LOC649495), mRNA. |                        | 0.00230619  | -2.34496 |
| ILMN_2120247 | IRF1      | 5  | Homo sapiens interferon regulatory factor 1 (IRF1), mRNA.                                           | IRF-1; MAR             | 7.30E-06    | -2.34795 |



|              |          |    |                                                                                                                         |                         |             |          |
|--------------|----------|----|-------------------------------------------------------------------------------------------------------------------------|-------------------------|-------------|----------|
| ILMN_2251766 | CD5      | 11 | Homo sapiens CD5 molecule (CD5), mRNA.                                                                                  | T1; LEU1                | 0.000690804 | -2.34851 |
| ILMN_2280203 | C6orf111 | 6  | Homo sapiens chromosome 6 open reading frame 111 (C6orf111), mRNA.                                                      | DKFZp564B0769; FLJ901   | 5.91E-07    | -2.34911 |
| ILMN_1670817 | PLAC9    | 10 | Homo sapiens placenta-specific 9 (PLAC9), mRNA.                                                                         | MGC104710               | 3.42E-06    | -2.35091 |
| ILMN_1871361 | NAP1L1   | 12 | Homo sapiens nucleosome assembly protein 1-like 1 (NAP1L1), transcript variant 1, mRNA.                                 | NAP1; NRP; NAP1L; FLJ16 | 0.0291813   | -2.35141 |
| ILMN_1727840 | FCN3     | 1  | Homo sapiens fibronectin (collagen/fibrinogen domain containing) 3 (Hakata antigen) (FCN3), transcript variant 1, mRNA. | MGC22543; FCNH; HAKA    | 0.00012868  | -2.3543  |
| ILMN_1798298 | ITGB5    | 3  | Homo sapiens integrin, beta 5 (ITGB5), mRNA. XM_944688 XM_944693                                                        | FLJ26658                | 0.00942353  | -2.35472 |
| ILMN_2183510 | GPNMB    | 7  | Homo sapiens glycoprotein (transmembrane) nmb (GPNMB), transcript variant 2, mRNA.                                      | NMB; HGFIN              | 0.0029463   | -2.35924 |
| ILMN_2367428 | LGALS3BP | 17 | Homo sapiens lectin, galactoside-binding, soluble, 3 binding protein (LGALS3BP), mRNA.                                  | MAC-2-BP; 90K           | 0.000310361 | -2.36031 |
| ILMN_1793287 | RPL29    | 3  | Homo sapiens ribosomal protein L29 (RPL29), mRNA.                                                                       | HUMRPL29; MGC88589; H   | 9.81E-05    | -2.36301 |
| ILMN_1664283 | RPL34    | 4  | Homo sapiens ribosomal protein L34 (RPL34), transcript variant 1, mRNA.                                                 |                         | 0.0344626   | -2.36315 |
| ILMN_1780659 | ALDH1A3  | 15 | Homo sapiens aldehyde dehydrogenase 1 family, member A3 (ALDH1A3), mRNA.                                                | RALDH3; ALDH6; ALDH1A   | 0.0016831   | -2.36825 |
| ILMN_2400183 | CCDC109B | 4  | Homo sapiens coiled-coil domain containing 109B (CCDC109B), mRNA.                                                       | FLJ20647                | 2.03E-08    | -2.37068 |

|              |           |    |                                                                                              |                         |             |          |
|--------------|-----------|----|----------------------------------------------------------------------------------------------|-------------------------|-------------|----------|
| ILMN_1773865 | STAMBPL1  | 10 | Homo sapiens STAM binding protein-like 1 (STAMBPL1), mRNA.                                   | bA399O19.2; AMSH-LP; A  | 1.20E-05    | -2.37097 |
| ILMN_1734929 | DUSP1     | 5  | Homo sapiens dual specificity phosphatase 1 (DUSP1), mRNA.                                   | HVH1; MKP1; MKP-1; PTF  | 0.028442    | -2.37244 |
| ILMN_2113126 | CUGBP2    | 10 | Homo sapiens CUG triplet repeat, RNA binding protein 2 (CUGBP2), transcript variant 2, mRNA. | BRUNOL3; ETR-3; NAPOR   | 0.0372717   | -2.3731  |
| ILMN_1707484 | TUBB6     | 18 | Homo sapiens tubulin, beta 6 (TUBB6), mRNA.                                                  | MGC132410; HsT1601; M   | 1.75E-05    | -2.37389 |
| ILMN_2386205 | PCDH20    | 13 | Homo sapiens protocadherin 20 (PCDH20), mRNA.                                                | PCDH13; FLJ22218        | 6.20E-06    | -2.37396 |
| ILMN_1719661 | APCS      | 1  | Homo sapiens amyloid P component, serum (APCS), mRNA.                                        | SAP; MGC88159; PTX2     | 0.0155566   | -2.37461 |
| ILMN_2256050 | LRMP      | 12 | Homo sapiens lymphoid-restricted membrane protein (LRMP), mRNA.                              | JAW1                    | 0.0219967   | -2.37925 |
| ILMN_2049184 | SAMD9L    | 7  | Homo sapiens sterile alpha motif domain containing 9-like (SAMD9L), mRNA.                    | FLJ39885; DRIF2; C7orf6 | 0.00994917  | -2.38412 |
| ILMN_2067709 | S100A10   | 1  | Homo sapiens S100 calcium binding protein A10 (S100A10), mRNA.                               | ANX2L; MGC111133; GP1   | 0.00027838  | -2.3847  |
| ILMN_2370414 | LAT       | 16 | Homo sapiens linker for activation of T cells (LAT), transcript variant 2, mRNA.             | pp36; LAT1              | 8.50E-07    | -2.38504 |
| ILMN_1772409 | LOC646567 | 1  | PREDICTED: Homo sapiens similar to HSPC307 (LOC646567), mRNA.                                |                         | 0.000688319 | -2.38762 |
| ILMN_1672504 | C6orf115  | 6  | Homo sapiens chromosome 6 open reading frame 115 (C6orf115), mRNA.                           | HSPC280; PRO2013        | 0.00489705  | -2.38778 |
| ILMN_1731688 | MGC39900  |    | PREDICTED: Homo sapiens hypothetical protein MGC39900 (MGC39900), mRNA.                      |                         | 0.000195434 | -2.38825 |

|              |          |    |                                                                                                               |                        |            |          |
|--------------|----------|----|---------------------------------------------------------------------------------------------------------------|------------------------|------------|----------|
| ILMN_1706344 | POLR3H   | 22 | Homo sapiens polymerase (RNA) III (DNA directed) polypeptide H (22.9kD) (POLR3H), transcript variant 2, mRNA. | RPC8; MGC29654; MGC1   | 4.32E-05   | -2.38989 |
| ILMN_1744006 | KIAA0746 | 4  | Homo sapiens KIAA0746 protein (KIAA0746), mRNA.                                                               | FLJ21629; FLJ41299; DK | 0.00144806 | -2.39398 |
| ILMN_1766918 | TMED6    | 16 | Homo sapiens transmembrane emp24 protein transport domain containing 6 (TMED6), mRNA.                         | PRO34237; SPL9146; M   | 8.64E-06   | -2.39482 |
| ILMN_1754517 | ABLIM2   | 4  | Homo sapiens actin binding LIM protein family, member 2 (ABLIM2), mRNA.                                       | FLJ39684; KIAA1808; DK | 0.00653631 | -2.39982 |
| ILMN_1816342 | TBX2     | 17 | Homo sapiens T-box 2 (TBX2), mRNA.                                                                            | FLJ10169               | 0.00058685 | -2.40063 |
| ILMN_1683112 | PEA15    | 1  | Homo sapiens phosphoprotein enriched in astrocytes 15 (PEA15), mRNA.                                          | HUMMAT1H; PEA-15; PED  | 2.04E-05   | -2.40495 |
| ILMN_2297765 | DOCK2    | 5  | Homo sapiens dedicator of cytokinesis 2 (DOCK2), mRNA.                                                        | FLJ46592; KIAA0209     | 2.06E-05   | -2.40899 |
| ILMN_1786310 | TMEM38B  | 9  | Homo sapiens transmembrane protein 38B (TMEM38B), mRNA.                                                       | RP11-219P18.1; FLJ1049 | 0.0330442  | -2.41    |
| ILMN_1784870 | CLIC1    | 6  | Homo sapiens chloride intracellular channel 1 (CLIC1), mRNA.                                                  | NCC27; G6              | 0.00618978 | -2.41083 |
| ILMN_1710070 | CPB2     | 13 | Homo sapiens carboxypeptidase B2 (plasma, carboxypeptidase U) (CPB2), transcript variant 1, mRNA.             | CPU; PCPB; TAFI        | 0.00183292 | -2.41134 |
| ILMN_1726138 | TCF4     | 18 | Homo sapiens transcription factor 4 (TCF4), transcript variant 2, mRNA.                                       | SEF2; ITF2; MGC149723; | 2.87E-05   | -2.4137  |
| ILMN_1680626 | ANKRD55  | 5  | Homo sapiens ankyrin repeat domain 55 (ANKRD55), transcript variant 2, mRNA.                                  | FLJ11795; MGC126014; M | 0.00123127 | -2.41578 |
| ILMN_1863994 | IL2RB    | 22 | Homo sapiens interleukin 2 receptor, beta (IL2RB), mRNA.                                                      | CD122; P70-75          | 0.0109392  | -2.42037 |

|              |         |    |                                                                                                                 |                        |             |          |
|--------------|---------|----|-----------------------------------------------------------------------------------------------------------------|------------------------|-------------|----------|
| ILMN_1785570 | RAGE    | 14 | Homo sapiens renal tumor antigen (RAGE), mRNA.                                                                  | MOK; RAGE1             | 0.00811938  | -2.42496 |
| ILMN_1771538 | HNT     | 11 | Homo sapiens neurotrimin (HNT), transcript variant 2, mRNA.                                                     | MGC60329; NTM          | 8.74E-06    | -2.42597 |
| ILMN_1821531 | P8      | 16 | Homo sapiens p8 protein (candidate of metastasis 1) (P8), mRNA.                                                 | COM1                   | 0.000367081 | -2.4304  |
| ILMN_1892548 | NR4A3   | 9  | Homo sapiens nuclear receptor subfamily 4, group A, member 3 (NR4A3), transcript variant 4, mRNA.               | CHN; CSMF; TEC; NOR1;  | 0.00446072  | -2.43294 |
| ILMN_1738604 | RRAS    | 19 | Homo sapiens related RAS viral (r-ras) oncogene homolog (RRAS), mRNA.                                           |                        | 0.025116    | -2.43523 |
| ILMN_1763196 | TSPAN4  | 11 | Homo sapiens tetraspanin 4 (TSPAN4), transcript variant 3, mRNA.                                                | NAG-2; NAG2; TETRASP   | 0.0408667   | -2.43856 |
| ILMN_1694780 | DNAJC12 | 10 | Homo sapiens DnaJ (Hsp40) homolog, subfamily C, member 12 (DNAJC12), transcript variant 2, mRNA.                | RP11-57G10.2; JDP1     | 0.00175945  | -2.43903 |
| ILMN_1657495 | PLOD2   | 3  | Homo sapiens procollagen-lysine, 2-oxoglutarate 5-dioxygenase 2 (PLOD2), transcript variant 2, mRNA.            | LH2; TLH               | 0.000796256 | -2.44146 |
| ILMN_2366473 | STAT1   | 2  | Homo sapiens signal transducer and activator of transcription 1, 91kDa (STAT1), transcript variant alpha, mRNA. | ISGF-3; STAT91; DKFZp6 | 5.71E-07    | -2.4417  |
| ILMN_1674394 | HBEGF   | 5  | Homo sapiens heparin-binding EGF-like growth factor (HBEGF), mRNA.                                              | DTS; DTSF; HEGFL; DTR  | 0.000154212 | -2.44537 |
| ILMN_1774336 | DDIT4   | 10 | Homo sapiens DNA-damage-inducible transcript 4 (DDIT4), mRNA.                                                   | RTP801; Dig2; REDD1; F | 0.000565341 | -2.44557 |

|              |           |    |                                                                                                                 |                        |             |          |
|--------------|-----------|----|-----------------------------------------------------------------------------------------------------------------|------------------------|-------------|----------|
| ILMN_2189027 | LOC613037 | 16 | Homo sapiens nuclear pore complex interacting protein pseudogene (LOC613037) on chromosome 16.                  |                        | 0.000415197 | -2.44585 |
| ILMN_1774110 | GPHN      | 14 | Homo sapiens gephyrin (GPHN), transcript variant 1, mRNA.                                                       | GPHRYN; GPH; GEPH; KIA | 0.0165352   | -2.44627 |
| ILMN_1738027 | C1orf24   | 1  | Homo sapiens chromosome 1 open reading frame 24 (C1orf24), transcript variant 2, mRNA.                          | NIBAN                  | 3.09E-05    | -2.44711 |
| ILMN_1671387 | TMEM53    | 1  | Homo sapiens transmembrane protein 53 (TMEM53), mRNA.                                                           | FLJ22353; RP4-678E16.2 | 0.0190204   | -2.4484  |
| ILMN_1872032 | CECR1     | 22 | Homo sapiens cat eye syndrome chromosome region, candidate 1 (CECR1), transcript variant 2, mRNA.               | ADGF; IDGFL            | 0.0310529   | -2.4495  |
| ILMN_1803033 | FLJ20160  | 2  | Homo sapiens FLJ20160 protein (FLJ20160), mRNA.                                                                 |                        | 0.000109345 | -2.45224 |
| ILMN_2057768 | CEP135    | 4  | Homo sapiens centrosomal protein 135kDa (CEP135), mRNA.                                                         | KIAA0635; CEP4         | 4.94E-05    | -2.45376 |
| ILMN_1812700 | REC8      | 14 | Homo sapiens REC8 homolog (yeast) (REC8), transcript variant 1, mRNA.                                           | HR21spB; REC8; MGC950  | 0.0252825   | -2.45504 |
| ILMN_1766650 | HSD17B7P2 | 10 | Homo sapiens hydroxysteroid (17-beta) dehydrogenase 7 pseudogene 2 (HSD17B7P2) on chromosome 10.                | Hsd17b_2; HSD17B7; MG  | 4.14E-05    | -2.45673 |
| ILMN_2144088 | CD83      | 6  | Homo sapiens CD83 molecule (CD83), transcript variant 1, mRNA.                                                  | HB15; BL11             | 0.00459068  | -2.4639  |
| ILMN_2334359 | DKFZP564C | 4  | Homo sapiens DKFZP564O0823 protein (DKFZP564O0823), mRNA.                                                       |                        | 0.0021205   | -2.46823 |
| ILMN_1655521 | DBI       | 2  | Homo sapiens diazepam binding inhibitor (GABA receptor modulator, acyl-Coenzyme A binding protein) (DBI), mRNA. | MGC70414; ACBD1; ACBI  | 0.000602557 | -2.47014 |

|              |        |    |                                                                                                             |                         |             |          |
|--------------|--------|----|-------------------------------------------------------------------------------------------------------------|-------------------------|-------------|----------|
| ILMN_1804662 | ABCC6  | 16 | Homo sapiens ATP-binding cassette, sub-family C (CFTR/MRP), member 6 (ABCC6), transcript variant 2, mRNA.   | MOATE; EST349056; ARA   | 0.0233879   | -2.4734  |
| ILMN_1749213 | IGFBP1 | 7  | Homo sapiens insulin-like growth factor binding protein 1 (IGFBP1), transcript variant 2, mRNA.             | PP12; hIGFBP-1; IGF-BP2 | 0.00190283  | -2.47491 |
| ILMN_1729417 | HLA-A  | 6  | Homo sapiens major histocompatibility complex, class I, A (HLA-A), mRNA.                                    |                         | 0.000310759 | -2.47768 |
| ILMN_1726306 | FJX1   | 11 | Homo sapiens four jointed box 1 (Drosophila) (FJX1), mRNA.                                                  | FLJ25593; FLJ22416      | 0.00129245  | -2.47847 |
| ILMN_1706523 | NOD2   | 16 | Homo sapiens nucleotide-binding oligomerization domain containing 2 (NOD2), mRNA.                           | NLRC2; CD; CARD15; PS   | 0.000502599 | -2.48125 |
| ILMN_1655549 | ACSL1  | 4  | Homo sapiens acyl-CoA synthetase long-chain family member 1 (ACSL1), mRNA.                                  | FACL2; LACS; FACL1; AC  | 0.000327941 | -2.48593 |
| ILMN_1685678 | INSIG1 | 7  | Homo sapiens insulin induced gene 1 (INSIG1), transcript variant 2, mRNA.                                   | MGC1405; CL-6           | 0.000535161 | -2.48928 |
| ILMN_1765912 | SNTB1  | 8  | Homo sapiens syntrophin, beta 1 (dystrophin-associated protein A1, 59kDa, basic component 1) (SNTB1), mRNA. | A1B; DAPA1B; BSYN2; M   | 0.004425    | -2.49042 |
| ILMN_1701603 | FIT1   | 14 | Homo sapiens fat-inducing transcript 1 (FIT1), mRNA.                                                        | MGC46490                | 0.00623114  | -2.50009 |
| ILMN_1693891 | SPG3A  | 14 | Homo sapiens spastic paraplegia 3A (autosomal dominant) (SPG3A), transcript variant 1, mRNA.                | SPG3; GBP3; FSP1; AD-F  | 0.00283235  | -2.50223 |
| ILMN_1653821 | FIS    | 5  | Homo sapiens FIS (FIS), mRNA.                                                                               | MGC126626               | 1.70E-05    | -2.50356 |
| ILMN_1729563 | EMP3   | 19 | Homo sapiens epithelial membrane protein 3 (EMP3), mRNA.                                                    | YMP                     | 0.0204778   | -2.50382 |

|              |          |    |                                                                                                                                        |                        |             |          |
|--------------|----------|----|----------------------------------------------------------------------------------------------------------------------------------------|------------------------|-------------|----------|
| ILMN_1852022 | HLA-DOA  | 6  | Homo sapiens major histocompatibility complex, class II, DO alpha (HLA-DOA), mRNA.                                                     | HLA-DNA; HLADZ; HLA-D  | 0.00741677  | -2.50477 |
| ILMN_2227968 | DEFA1    | 8  | Homo sapiens defensin, alpha 1 (DEFA1), mRNA.                                                                                          | MGC138393; MRS; DEF1;  | 0.0183103   | -2.50702 |
| ILMN_1681780 | HIST1H4C | 6  | Homo sapiens histone cluster 1, H4c (HIST1H4C), mRNA.                                                                                  | H4FG; dJ221C16.1; H4/g | 0.0200245   | -2.50884 |
| ILMN_1760087 | ACSM2B   | 16 | Homo sapiens acyl-CoA synthetase medium-chain family member 2B (ACSM2B), nuclear gene encoding mitochondrial protein, mRNA.            | HYST1046; HXMA; ACSM   | 0.0115371   | -2.51439 |
| ILMN_1787275 | HLA-DRA  | 6  | Homo sapiens major histocompatibility complex, class II, DR alpha (HLA-DRA), mRNA.                                                     | HLA-DRA1               | 0.00911163  | -2.51861 |
| ILMN_1774387 | SCD5     | 4  | Homo sapiens stearoyl-CoA desaturase 5 (SCD5), transcript variant 1, mRNA.                                                             | HSCD5; SCD4; FLJ21032  | 1.32E-05    | -2.5189  |
| ILMN_1854580 | ACOT2    | 14 | Homo sapiens acyl-CoA thioesterase 2 (ACOT2), nuclear gene encoding mitochondrial protein, mRNA.                                       | Mte1; ZAP128; PTE2     | 6.10E-06    | -2.52215 |
| ILMN_2218935 |          |    | Homo sapiens mRNA; cDNA DKFZp779M2422 (from clone DKFZp779M2422)                                                                       |                        | 0.00597193  | -2.52362 |
| ILMN_1670903 | GEMIN6   | 2  | Homo sapiens gem (nuclear organelle) associated protein 6 (GEMIN6), mRNA.                                                              | FLJ23459               | 0.000789507 | -2.52367 |
| ILMN_2275248 | ATP1B3   |    | PREDICTED: Homo sapiens ATPase, Na <sup>+</sup> /K <sup>+</sup> transporting, beta 3 polypeptide, transcript variant 2 (ATP1B3), mRNA. |                        | 0.0202856   | -2.52754 |
| ILMN_1660413 | MANEA    | 6  | Homo sapiens mannosidase, endo-alpha (MANEA), mRNA.                                                                                    | FLJ12838; hEndo; DKFZp | 0.00541995  | -2.53586 |
| ILMN_2412927 | GOLGA8B  | 15 | Homo sapiens golgi autoantigen, golgin subfamily a, 8B (GOLGA8B), mRNA.                                                                | KIAA0855; GOLGA5       | 8.11E-05    | -2.53591 |

|              |           |    |                                                                                                 |                        |             |          |
|--------------|-----------|----|-------------------------------------------------------------------------------------------------|------------------------|-------------|----------|
| ILMN_1695530 | SLC35B1   | 17 | Homo sapiens solute carrier family 35, member B1 (SLC35B1), mRNA.                               | UGTREL1                | 0.00255075  | -2.53635 |
| ILMN_1753111 | DDEF1     | 8  | Homo sapiens development and differentiation enhancing factor 1 (DDEF1), mRNA.                  | ZG14P; AMAP1; PAG2; AS | 0.0110376   | -2.5387  |
| ILMN_1814589 | TTLL3     | 3  | Homo sapiens tubulin tyrosine ligase-like family, member 3 (TTLL3), transcript variant 2, mRNA. | MGC120532; MGC120530   | 0.000211042 | -2.53994 |
| ILMN_1659843 | STX3      | 11 | Homo sapiens syntaxin 3 (STX3), mRNA.                                                           | STX3A                  | 5.33E-05    | -2.54263 |
| ILMN_1752802 | CRISPLD2  | 16 | Homo sapiens cysteine-rich secretory protein LCCL domain containing 2 (CRISPLD2), mRNA.         | DKFZP434B044; MGC748   | 0.00363816  | -2.54395 |
| ILMN_1654065 | C2Oorf121 | 20 | Homo sapiens chromosome 20 open reading frame 121 (C2Oorf121), transcript variant 2, mRNA.      | DKFZp686E0870; MGC24   | 0.00801805  | -2.54788 |
| ILMN_1652431 | SAA1      | 11 | Homo sapiens serum amyloid A1 (SAA1), transcript variant 2, mRNA.                               | MGC111216; SAA; PIG4;  | 0.00356815  | -2.54934 |
| ILMN_1873621 | PVALB     | 22 | Homo sapiens parvalbumin (PVALB), mRNA.                                                         | D22S749; MGC116759     | 0.0153233   | -2.55012 |
| ILMN_1777976 | DNAH2     | 17 | Homo sapiens dynein, axonemal, heavy chain 2 (DNAH2), mRNA.                                     | FLJ46675; DNAHC2; DNH  | 0.0111435   | -2.55088 |
| ILMN_2394296 | PTGDS     | 9  | Homo sapiens prostaglandin D2 synthase 21kDa (brain) (PTGDS), mRNA.                             | PGD2; PGDS; PGDS2; PD  | 0.000256625 | -2.55658 |
| ILMN_1748707 | CREB5     | 7  | Homo sapiens cAMP responsive element binding protein 5 (CREB5), transcript variant 1, mRNA.     | CRE-BPA                | 0.00204682  | -2.5588  |
| ILMN_1762713 | CLPTM1L   | 5  | Homo sapiens CLPTM1-like (CLPTM1L), mRNA.                                                       | DKFZp666M1010; FLJ144  | 0.00389199  | -2.56152 |



|              |         |    |                                                                                                                                 |                        |             |          |
|--------------|---------|----|---------------------------------------------------------------------------------------------------------------------------------|------------------------|-------------|----------|
| ILMN_1682737 | RUNX1   | 21 | Homo sapiens runt-related transcription factor 1 (acute myeloid leukemia 1; aml1 oncogene) (RUNX1), transcript variant 1, mRNA. | AMLCR1; PEBP2aB; EVI-1 | 0.000129068 | -2.56401 |
| ILMN_1768577 | TPD52L1 | 6  | Homo sapiens tumor protein D52-like 1 (TPD52L1), transcript variant 4, mRNA.                                                    | D53; MGC8556; hD53; T  | 0.00075563  | -2.56567 |
| ILMN_1813598 | MBOAT5  | 12 | Homo sapiens membrane bound O-acyltransferase domain containing 5 (MBOAT5), mRNA.                                               | C3F; OACT5; nesy       | 0.000266534 | -2.56632 |
| ILMN_1807833 | CNN2    | 19 | Homo sapiens calponin 2 (CNN2), transcript variant 2, mRNA.                                                                     |                        | 0.0104079   | -2.56742 |
| ILMN_1729868 | ALKBH2  | 12 | Homo sapiens alkB, alkylation repair homolog 2 (E. coli) (ALKBH2), mRNA.                                                        | ABH2; MGC90512; hABH2  | 0.000152726 | -2.57004 |
| ILMN_1727618 | FASTKD3 | 5  | Homo sapiens FAST kinase domains 3 (FASTKD3), mRNA.                                                                             | FLJ23274; MGC5297; MG  | 0.0429664   | -2.57326 |
| ILMN_1772302 | SLCO2A1 | 3  | Homo sapiens solute carrier organic anion transporter family, member 2A1 (SLCO2A1), mRNA.                                       | OATP2A1; PGT; SLC21A2  | 0.000129527 | -2.58072 |
| ILMN_2405305 | RAB43   | 3  | Homo sapiens RAB43, member RAS oncogene family (RAB43), mRNA.                                                                   | MGC90481; RAB11B; ISY  | 0.00519046  | -2.58628 |
| ILMN_1657838 | NR4A1   | 12 | Homo sapiens nuclear receptor subfamily 4, group A, member 1 (NR4A1), transcript variant 3, mRNA.                               | N10; NUR77; NP10; NAK  | 0.00597954  | -2.58738 |
| ILMN_1869781 | WNT4    | 1  | Homo sapiens wingless-type MMTV integration site family, member 4 (WNT4), mRNA.                                                 | WNT-4                  | 6.23E-05    | -2.58798 |
| ILMN_1733758 | GSTP1   | 11 | Homo sapiens glutathione S-transferase pi (GSTP1), mRNA.                                                                        | DFN7; GST3; PI; FAEES3 | 0.0342348   | -2.64368 |
| ILMN_1659947 | KLF13   | 15 | Homo sapiens Kruppel-like factor 13 (KLF13), mRNA.                                                                              | NSLP1; FKLF2; RFLAT-1; | 0.00442022  | -2.64813 |

|              |         |    |                                                                                                                 |                        |             |          |
|--------------|---------|----|-----------------------------------------------------------------------------------------------------------------|------------------------|-------------|----------|
| ILMN_1758457 | PTGIS   | 20 | Homo sapiens prostaglandin I2 (prostacyclin) synthase (PTGIS), mRNA.                                            | CYP8A1; PGIS; MGC1268  | 0.0125244   | -2.64894 |
| ILMN_1846406 | CYBA    | 16 | Homo sapiens cytochrome b-245, alpha polypeptide (CYBA), mRNA.                                                  |                        | 4.53E-05    | -2.6512  |
| ILMN_1655312 | ABCC9   | 12 | Homo sapiens ATP-binding cassette, sub-family C (CFTR/MRP), member 9 (ABCC9), transcript variant SUR2B, mRNA.   | ABC37; FLJ36852; SUR2; | 0.00271169  | -2.65548 |
| ILMN_1671489 | SAMD5   | 6  | Homo sapiens sterile alpha motif domain containing 5 (SAMD5), mRNA.                                             | dJ875H10.1             | 0.0110458   | -2.65932 |
| ILMN_2305407 | ZNF763  | 19 | Homo sapiens zinc finger protein 763 (ZNF763), mRNA.                                                            | ZNF; ZNF440L           | 0.00965701  | -2.66037 |
| ILMN_1771051 | ITGAV   | 2  | Homo sapiens integrin, alpha v (vitronectin receptor, alpha polypeptide, antigen CD51) (ITGAV), mRNA.           | CD51; DKFZp686A08142   | 0.0127168   | -2.66197 |
| ILMN_1670672 | TRPM4   | 19 | Homo sapiens transient receptor potential cation channel, subfamily M, member 4 (TRPM4), mRNA.                  | FLJ20041; TRPM4B       | 0.00448067  | -2.66439 |
| ILMN_1677962 | VIM     | 10 | Homo sapiens vimentin (VIM), mRNA.                                                                              | FLJ36605               | 9.76E-06    | -2.66492 |
| ILMN_2347789 | PDCD4   | 10 | Homo sapiens programmed cell death 4 (neoplastic transformation inhibitor) (PDCD4), transcript variant 2, mRNA. | MGC33046; MGC33047; I  | 0.00162217  | -2.66526 |
| ILMN_1702698 | TCEAL2  | X  | Homo sapiens transcription elongation factor A (SII)-like 2 (TCEAL2), mRNA.                                     | MY0876G05; my048       | 2.62E-06    | -2.67227 |
| ILMN_1706818 | TNFAIP2 | 14 | Homo sapiens tumor necrosis factor, alpha-induced protein 2 (TNFAIP2), mRNA.                                    | B94                    | 0.00318423  | -2.67352 |
| ILMN_1805104 | JUND    | 19 | Homo sapiens jun D proto-oncogene (JUND), mRNA.                                                                 |                        | 0.000179989 | -2.67825 |

|              |           |    |                                                                                                                                 |                        |             |          |
|--------------|-----------|----|---------------------------------------------------------------------------------------------------------------------------------|------------------------|-------------|----------|
| ILMN_1720889 | RND2      | 17 | Homo sapiens Rho family GTPase 2 (RND2), mRNA.                                                                                  | ARHN; RHO7; RhoN       | 3.55E-05    | -2.68581 |
| ILMN_1697802 | LOC158160 | 10 | Homo sapiens hypothetical protein LOC158160 (LOC158160), transcript variant 1, mRNA.                                            | Hsd17b_2; HSD17B7; MG  | 0.000157398 | -2.68819 |
| ILMN_2303166 | DEFA4     | 8  | Homo sapiens defensin, alpha 4, corticostatin (DEFA4), mRNA.                                                                    | MGC120099; HNP-4; MG   | 4.20E-06    | -2.70499 |
| ILMN_1734702 | HMBS      | 11 | Homo sapiens hydroxymethylbilane synthase (HMBS), transcript variant 1, mRNA.                                                   | PBG-D; UPS; PBGD       | 2.61E-06    | -2.70905 |
| ILMN_1780575 | LUM       | 12 | Homo sapiens lumican (LUM), mRNA.                                                                                               | SLRR2D; LDC            | 0.00234988  | -2.71203 |
| ILMN_2094061 | LCAT      | 16 | Homo sapiens lecithin-cholesterol acyltransferase (LCAT), mRNA.                                                                 |                        | 0.00211079  | -2.71271 |
| ILMN_1767831 | PCBD1     | 10 | Homo sapiens pterin-4 alpha-carbinolamine dehydratase/dimerization cofactor of hepatocyte nuclear factor 1 alpha (PCBD1), mRNA. | PHS; PCD; DCOH; PCBD   | 0.000545826 | -2.71583 |
| ILMN_1815527 | GLS       | 2  | Homo sapiens glutaminase (GLS), mRNA.                                                                                           | KIAA0838; GLS1; DKFZp  | 0.0075979   | -2.7208  |
| ILMN_2411731 | TRIM15    | 6  | Homo sapiens tripartite motif-containing 15 (TRIM15), transcript variant 1, mRNA.                                               | ZNF178; ZNFB7; RNF93   | 0.00239282  | -2.72652 |
| ILMN_1738866 | DPYSL2    | 8  | Homo sapiens dihydropyrimidinase-like 2 (DPYSL2), mRNA.                                                                         | DHPRP2; DRP-2; DRP2; C | 2.79E-06    | -2.72701 |
| ILMN_1689037 |           |    | AV681673 GKB Homo sapiens cDNA clone GKBABD06 5, mRNA sequence                                                                  |                        | 0.000146645 | -2.72906 |
| ILMN_1737517 | DKK3      | 11 | Homo sapiens dickkopf homolog 3 (Xenopus laevis) (DKK3), transcript variant 1, mRNA.                                            | REIC                   | 0.00899632  | -2.73433 |

|              |           |    |                                                                                                           |                         |             |          |
|--------------|-----------|----|-----------------------------------------------------------------------------------------------------------|-------------------------|-------------|----------|
| ILMN_1905548 | PRRX1     | 1  | Homo sapiens paired related homeobox 1 (PRRX1), transcript variant pmx-1a, mRNA.                          | PRX1; PMX1; PHOX1       | 0.0203703   | -2.74469 |
| ILMN_2340347 | HCST      | 19 | Homo sapiens hematopoietic cell signal transducer (HCST), transcript variant 2, mRNA.                     | DKFZP586C1522; DAP10;   | 0.0106186   | -2.7453  |
| ILMN_1757026 | EGR2      | 10 | Homo sapiens early growth response 2 (Krox-20 homolog, Drosophila) (EGR2), mRNA.                          | KROX20; FLJ14547; DKF2  | 2.20E-05    | -2.75209 |
| ILMN_1751453 | HK1       | 10 | Homo sapiens hexokinase 1 (HK1), nuclear gene encoding mitochondrial protein, transcript variant 5, mRNA. | HK1-tc; HKI; HK1-tb; HK | 5.28E-07    | -2.755   |
| ILMN_1663032 | FNDC4     | 2  | Homo sapiens fibronectin type III domain containing 4 (FNDC4), mRNA.                                      | FLJ22362; FRCP1         | 3.33E-05    | -2.75527 |
| ILMN_2312817 | LOC732058 |    | PREDICTED: Homo sapiens similar to Apolipoprotein(a) precursor (Apo(a)) (Lp(a)) (LOC732058), mRNA.        |                         | 0.0299482   | -2.75797 |
| ILMN_1854270 | ISOC2     | 19 | Homo sapiens isochorismatase domain containing 2 (ISOC2), mRNA.                                           |                         | 0.000553768 | -2.76417 |
| ILMN_1733443 | PKM2      | 15 | Homo sapiens pyruvate kinase, muscle (PKM2), transcript variant 3, mRNA.                                  | PKM; THBP1; MGC3932;    | 3.20E-05    | -2.77083 |
| ILMN_1782938 | FXYD5     | 19 | Homo sapiens FXYP domain containing ion transport regulator 5 (FXYD5), transcript variant 2, mRNA.        | dysad; OIT2; PRO6241; H | 0.00732388  | -2.77407 |
| ILMN_1676384 | DNAJC12   | 10 | Homo sapiens DnaJ (Hsp40) homolog, subfamily C, member 12 (DNAJC12), transcript variant 1, mRNA.          | RP11-57G10.2; JDP1      | 0.00031581  | -2.77512 |
| ILMN_1697872 | BRCA1     | 17 | Homo sapiens breast cancer 1, early onset (BRCA1), transcript variant BRCA1-delta11b, mRNA.               | RNF53; BRCAI; PSCP; BR  | 0.00239417  | -2.77542 |

|              |          |    |                                                                                                                                                        |                        |             |          |
|--------------|----------|----|--------------------------------------------------------------------------------------------------------------------------------------------------------|------------------------|-------------|----------|
| ILMN_1708672 | SHFM1    | 7  | Homo sapiens split hand/foot malformation (ectrodactyly) type 1 (SHFM1), mRNA.                                                                         | SHSF1; DSS1; SHFD1; S  | 0.024509    | -2.77847 |
| ILMN_1688580 | GMPPB    | 3  | Homo sapiens GDP-mannose pyrophosphorylase B (GMPPB), transcript variant 2, mRNA.                                                                      | KIAA1851               | 0.0327913   | -2.78399 |
| ILMN_1813456 |          |    | Homo sapiens mRNA; cDNA DKFZp686F1546 (from clone DKFZp686F1546)                                                                                       |                        | 0.000142054 | -2.79654 |
| ILMN_1757867 | SERPINA1 | 14 | Homo sapiens serpin peptidase inhibitor, clade A (alpha-1 antiproteinase, antitrypsin), member 1 (SERPINA1), transcript variant 1, mRNA.               | PI1; MGC23330; PRO227  | 0.000858454 | -2.80046 |
| ILMN_2125395 | FPR3     | 19 | Homo sapiens formyl peptide receptor 3 (FPR3), mRNA.                                                                                                   | FMLPY; RMLP-R-I; FPRH2 | 0.003247    | -2.81478 |
| ILMN_1758938 | HLA-DPA1 | 6  | Homo sapiens major histocompatibility complex, class II, DP alpha 1 (HLA-DPA1), mRNA.                                                                  | HLADP; HLA-DP1A; HLAS  | 3.58E-06    | -2.81487 |
| ILMN_1741957 | NDUFAF1  | 15 | Homo sapiens NADH dehydrogenase (ubiquinone) 1 alpha subcomplex, assembly factor 1 (NDUFAF1), mRNA.                                                    | CGI65; CGI-65; CIA30   | 0.00861706  | -2.82947 |
| ILMN_1714383 | ECE2     | 3  | Homo sapiens endothelin converting enzyme 2 (ECE2), transcript variant 3, mRNA.                                                                        | MGC78487; MGC17664; F  | 3.54E-05    | -2.83227 |
| ILMN_1764980 | PRICKLE1 | 12 | Homo sapiens prickly homolog 1 (Drosophila) (PRICKLE1), mRNA.                                                                                          | MGC138902; FLJ31627; M | 0.00125012  | -2.83782 |
| ILMN_2141790 | ITGB2    | 21 | Homo sapiens integrin, beta 2 (antigen CD18 (p95), lymphocyte function-associated antigen 1; macrophage antigen 1 (mac-1) beta subunit) (ITGB2), mRNA. | MAC-1; LFA-1; MF17; LC | 0.00641559  | -2.83987 |

|              |           |    |                                                                                                                                                             |                        |            |          |
|--------------|-----------|----|-------------------------------------------------------------------------------------------------------------------------------------------------------------|------------------------|------------|----------|
| ILMN_1677607 | OSR1      | 2  | Homo sapiens odd-skipped related 1 (Drosophila) (OSR1), mRNA.                                                                                               | ODD                    | 1.96E-05   | -2.84288 |
| ILMN_1783963 | SLC46A1   | 17 | Homo sapiens solute carrier family 46 (folate transporter), member 1 (SLC46A1), mRNA.                                                                       | MGC9564; HCP1; PCFT    | 0.00412883 | -2.86546 |
| ILMN_1811933 | PPP1R1A   | 12 | Homo sapiens protein phosphatase 1, regulatory (inhibitor) subunit 1A (PPP1R1A), mRNA.                                                                      |                        | 3.95E-05   | -2.86596 |
| ILMN_1762883 | ZYX       | 7  | Homo sapiens zyxin (ZYX), transcript variant 1, mRNA.                                                                                                       | ESP-2; HED-2           | 0.00065008 | -2.87454 |
| ILMN_1774604 | TMEM200A  | 6  | Homo sapiens transmembrane protein 200A (TMEM200A), mRNA.                                                                                                   | TTMC                   | 0.0305297  | -2.88258 |
| ILMN_2323338 | LOC606724 | 16 | Homo sapiens coronin, actin binding protein, 1A pseudogene (LOC606724) on chromosome 16.                                                                    |                        | 2.85E-05   | -2.8864  |
| ILMN_1655244 | ATF7IP    | 12 | Homo sapiens activating transcription factor 7 interacting protein (ATF7IP), mRNA.                                                                          | FLJ10139; FLJ10688; MC | 1.94E-05   | -2.88908 |
| ILMN_1669940 | CDC42EP5  | 19 | Homo sapiens CDC42 effector protein (Rho GTPase binding) 5 (CDC42EP5), mRNA.                                                                                | MGC21945; CEP5; Borg3  | 0.00232556 | -2.8954  |
| ILMN_2043918 | DPAGT1    | 11 | Homo sapiens diphosphatase (UDP-N-acetylglucosamine) N-acetylglucosaminophosphotransferase 1 (GlcNAc-1-P transferase) (DPAGT1), transcript variant 1, mRNA. | GPT; DPAGT2; D11S366;  | 1.31E-05   | -2.8962  |
| ILMN_1729801 | SLITRK3   | 3  | Homo sapiens SLIT and NTRK-like family, member 3 (SLITRK3), mRNA.                                                                                           | MGC138681; KIAA0848    | 0.011105   | -2.89938 |
| ILMN_1684017 | STEAP3    | 2  | Homo sapiens STEAP family member 3 (STEAP3), transcript variant 2, mRNA.                                                                                    | STMP3; dudlin-2; TSAP6 | 5.78E-05   | -2.90465 |

|              |         |    |                                                                                          |                        |             |          |
|--------------|---------|----|------------------------------------------------------------------------------------------|------------------------|-------------|----------|
| ILMN_1707551 | S100A12 | 1  | Homo sapiens S100 calcium binding protein A12 (S100A12), mRNA.                           | CAAF1; CAGC; ENRAGE;   | 5.59E-05    | -2.91311 |
| ILMN_1773586 | FRAS1   | 4  | Homo sapiens Fraser syndrome 1 (FRAS1), mRNA.                                            | KIAA1500; FLJ22031; FL | 0.00168354  | -2.92328 |
| ILMN_1693939 | FILIP1L | 3  | Homo sapiens filamin A interacting protein 1-like (FILIP1L), transcript variant 1, mRNA. | DOC-1; GIP90; DOC1     | 0.0272185   | -2.92467 |
| ILMN_1726659 | MFSD10  | 4  | Homo sapiens major facilitator superfamily domain containing 10 (MFSD10), mRNA.          | TETTRAN; TPO1          | 0.0268558   | -2.92834 |
| ILMN_1729212 | CX3CR1  | 3  | Homo sapiens chemokine (C-X3-C motif) receptor 1 (CX3CR1), mRNA.                         | CMKDR1; GPR13; V28; G  | 0.000295879 | -2.94477 |
| ILMN_1803005 | STON1   | 2  | Homo sapiens stonin 1 (STON1), mRNA.                                                     | DKFZp781K2462; SBLF; S | 3.66E-07    | -2.94613 |
| ILMN_2228463 | SH3GL2  | 9  | Homo sapiens SH3-domain GRB2-like 2 (SH3GL2), mRNA.                                      | CNSA2; SH3P4; SH3D2A;  | 0.00534572  | -2.95001 |
| ILMN_1755926 |         |    | Homo sapiens mRNA; cDNA DKFZp686D0853 (from clone DKFZp686D0853)                         |                        | 9.74E-07    | -2.9567  |
| ILMN_1881206 | HRC     | 19 | Homo sapiens histidine rich calcium binding protein (HRC), mRNA.                         | MGC133236              | 0.002463    | -2.98087 |
| ILMN_1844400 | ARHGEF3 | 3  | Homo sapiens Rho guanine nucleotide exchange factor (GEF) 3 (ARHGEF3), mRNA.             | DKFZP434F2429; XPLN; C | 1.22E-05    | -2.98567 |
| ILMN_1716435 | COL16A1 | 1  | Homo sapiens collagen, type XVI, alpha 1 (COL16A1), mRNA.                                | FP1572; 447AA          | 2.86E-06    | -2.98752 |
| ILMN_1715024 | KLF4    | 9  | Homo sapiens Kruppel-like factor 4 (gut) (KLF4), mRNA.                                   | GKLF; EZF              | 0.0325347   | -2.99519 |
| ILMN_1793410 | EDNRA   | 4  | Homo sapiens endothelin receptor type A (EDNRA), mRNA.                                   | ETRA; ETA              | 0.00166149  | -3.00218 |
| ILMN_1720858 | ANXA1   | 9  | Homo sapiens annexin A1 (ANXA1), mRNA.                                                   | LPC1; ANX1             | 0.000172166 | -3.00529 |

|              |          |    |                                                                                                                                                                  |                        |             |          |
|--------------|----------|----|------------------------------------------------------------------------------------------------------------------------------------------------------------------|------------------------|-------------|----------|
| ILMN_1681916 | RAB7B    |    | Homo sapiens RAB7B, member RAS oncogene family (RAB7B), mRNA.                                                                                                    | MGC9726; RAB7; MGC16   | 1.51E-05    | -3.01136 |
| ILMN_1749417 | TIMP2    | 17 | Homo sapiens TIMP metalloproteinase inhibitor 2 (TIMP2), mRNA.                                                                                                   | CSC-21K                | 0.00581268  | -3.03176 |
| ILMN_1709167 | FLJ35258 | 19 | Homo sapiens hypothetical protein 284297 (FLJ35258), mRNA.                                                                                                       |                        | 0.000100002 | -3.04271 |
| ILMN_1797154 | HLA-DRA  | 6  | Homo sapiens major histocompatibility complex, class II, DR alpha (HLA-DRA), mRNA.                                                                               | HLA-DRA1               | 0.000428098 | -3.04403 |
| ILMN_2172091 | RGS10    | 10 | Homo sapiens regulator of G-protein signaling 10 (RGS10), transcript variant 2, mRNA.                                                                            |                        | 0.00878113  | -3.04552 |
| ILMN_1658917 | ERBB2    | 17 | Homo sapiens v-erb-b2 erythroblastic leukemia viral oncogene homolog 2, neuro/glioblastoma derived oncogene homolog (avian) (ERBB2), transcript variant 1, mRNA. | c-erb B2; CD340; HER2; | 0.000223274 | -3.05021 |
| ILMN_1700340 | ACTA2    | 10 | Homo sapiens actin, alpha 2, smooth muscle, aorta (ACTA2), mRNA.                                                                                                 | ACTSA                  | 0.00186675  | -3.05253 |
| ILMN_2381206 | GALK1    | 17 | Homo sapiens galactokinase 1 (GALK1), mRNA.                                                                                                                      | GALK; GK1              | 0.00130688  | -3.05348 |
| ILMN_1738268 | CLSTN1   | 1  | Homo sapiens calyculin 1 (CLSTN1), transcript variant 1, mRNA.                                                                                                   | CSTN1; PIK3CD; XB31alp | 0.00349966  | -3.05951 |
| ILMN_1744442 | RGS2     | 1  | Homo sapiens regulator of G-protein signalling 2, 24kDa (RGS2), mRNA.                                                                                            | GOS8                   | 4.17E-07    | -3.06396 |
| ILMN_1662640 | PPP1R3C  | 10 | Homo sapiens protein phosphatase 1, regulatory (inhibitor) subunit 3C (PPP1R3C), mRNA.                                                                           | PPP1R5                 | 0.00197623  | -3.07539 |



|              |         |    |                                                                                                             |                        |             |          |
|--------------|---------|----|-------------------------------------------------------------------------------------------------------------|------------------------|-------------|----------|
| ILMN_2402817 | OAS2    | 12 | Homo sapiens 2'-5'-oligoadenylate synthetase 2, 69/71kDa (OAS2), transcript variant 1, mRNA.                | MGC78578               | 0.00248     | -3.07577 |
| ILMN_1659682 | GLRX    | 5  | Homo sapiens glutaredoxin (thioltransferase) (GLRX), mRNA.                                                  | GRX; GRX1; MGC117407   | 3.15E-05    | -3.08833 |
| ILMN_1786426 | LAMA2   | 6  | Homo sapiens laminin, alpha 2 (merosin, congenital muscular dystrophy) (LAMA2), transcript variant 2, mRNA. | LAMM                   | 0.000119428 | -3.12243 |
| ILMN_2056606 | SYNPO2  |    | PREDICTED: Homo sapiens synaptopodin 2, transcript variant 4 (SYNPO2), mRNA.                                |                        | 0.0164068   | -3.12254 |
| ILMN_1676192 | LRRC32  | 11 | Homo sapiens leucine rich repeat containing 32 (LRRC32), mRNA.                                              | GARP; D11S833E         | 0.016716    | -3.14644 |
| ILMN_1758673 | FOSB    | 19 | Homo sapiens FBJ murine osteosarcoma viral oncogene homolog B (FOSB), mRNA.                                 | GOS3; GOS3; MGC42291   | 1.86E-06    | -3.15382 |
| ILMN_1767474 | MAPK10  | 4  | Homo sapiens mitogen-activated protein kinase 10 (MAPK10), transcript variant 2, mRNA.                      | PRKM10; JNK3; FLJ33785 | 7.92E-06    | -3.15505 |
| ILMN_1772131 | SPARCL1 | 4  | Homo sapiens SPARC-like 1 (mast9, hevin) (SPARCL1), mRNA.                                                   | PIG33; SC1             | 2.79E-08    | -3.1764  |
| ILMN_1673649 | FGG     | 4  | Homo sapiens fibrinogen gamma chain (FGG), transcript variant gamma-B, mRNA.                                |                        | 0.00288971  | -3.17646 |
| ILMN_1761312 | SLC1A7  | 1  | Homo sapiens solute carrier family 1 (glutamate transporter), member 7 (SLC1A7), mRNA.                      | FLJ36602; EAAT5; AAAT  | 0.0130362   | -3.17995 |
| ILMN_1743784 | SGIP1   | 1  | Homo sapiens SH3-domain GRB2-like (endophilin) interacting protein 1 (SGIP1), mRNA.                         | FLJ43054; DKFZp761D22  | 0.000250199 | -3.18593 |

|              |          |    |                                                                                                                            |                        |             |          |
|--------------|----------|----|----------------------------------------------------------------------------------------------------------------------------|------------------------|-------------|----------|
| ILMN_1808078 | EVI1     | 3  | Homo sapiens ecotropic viral integration site 1 (EVI1), mRNA.                                                              | EVI-1; PRDM3; MGC1633  | 0.000473497 | -3.18654 |
| ILMN_1730628 | SLCO3A1  |    | PREDICTED: Homo sapiens solute carrier organic anion transporter family, member 3A1, transcript variant 2 (SLCO3A1), mRNA. |                        | 0.00047471  | -3.20051 |
| ILMN_2319424 | HSH2D    | 19 | Homo sapiens hematopoietic SH2 domain containing (HSH2D), mRNA.                                                            | HSH2; ALX; FLJ14886    | 0.000202556 | -3.20282 |
| ILMN_1654385 | LSM11    | 5  | Homo sapiens LSM11, U7 small nuclear RNA associated (LSM11), mRNA.                                                         | FLJ38273               | 3.15E-05    | -3.20324 |
| ILMN_2364131 | SYT17    | 16 | Homo sapiens synaptotagmin XVII (SYT17), mRNA.                                                                             |                        | 2.09E-07    | -3.2176  |
| ILMN_2136089 | MLLT6    | 17 | Homo sapiens myeloid/lymphoid or mixed-lineage leukemia (trithorax homolog, Drosophila); translocated to, 6 (MLLT6), mRNA. | AF17; FLJ23480         | 0.0005839   | -3.22175 |
| ILMN_1703572 | MGC61598 |    | PREDICTED: Homo sapiens similar to ankyrin-repeat protein Nrarp (MGC61598), mRNA.                                          |                        | 0.0224985   | -3.22256 |
| ILMN_1763852 |          |    | Homo sapiens cDNA FLJ26188 fis, clone ADG04821                                                                             |                        | 1.67E-06    | -3.23519 |
| ILMN_1801020 | GLIS3    | 9  | Homo sapiens GLIS family zinc finger 3 (GLIS3), transcript variant 2, mRNA.                                                | MGC33662; FLJ90578; ZI | 0.000118315 | -3.23612 |
| ILMN_1672872 |          |    | EST366269 MAGE resequences, MAGC Homo sapiens cDNA, mRNA sequence                                                          |                        | 0.000201662 | -3.27354 |

|              |          |    |                                                                                                                                             |                         |             |          |
|--------------|----------|----|---------------------------------------------------------------------------------------------------------------------------------------------|-------------------------|-------------|----------|
| ILMN_1778444 | KCNN2    | 5  | Homo sapiens potassium intermediate/small conductance calcium-activated channel, subfamily N, member 2 (KCNN2), transcript variant 1, mRNA. | KCa2.2; SKCA2; SK2; hS  | 0.000969828 | -3.27475 |
| ILMN_1782993 | RASL12   | 15 | Homo sapiens RAS-like, family 12 (RASL12), mRNA.                                                                                            | RIS                     | 0.00050884  | -3.32346 |
| ILMN_1705629 | BGN      | X  | Homo sapiens biglycan (BGN), mRNA.                                                                                                          | SLRR1A; PG-S1; PGI; DS  | 0.000103703 | -3.33061 |
| ILMN_1787815 | MAP1LC3A | 20 | Homo sapiens microtubule-associated protein 1 light chain 3 alpha (MAP1LC3A), transcript variant 2, mRNA.                                   | MAP1ALC3; MAP1BLC3      | 0.00266895  | -3.339   |
| ILMN_1705183 | NEU4     | 2  | Homo sapiens sialidase 4 (NEU4), mRNA.                                                                                                      | MGC102757; MGC18222     | 0.00612275  | -3.3401  |
| ILMN_1679401 | PHLDB1   | 11 | Homo sapiens pleckstrin homology-like domain, family B, member 1 (PHLDB1), mRNA.                                                            | FLJ90266; DKFZp686O24   | 7.12E-05    | -3.34848 |
| ILMN_1736533 | LGALS1   | 22 | Homo sapiens lectin, galactoside-binding, soluble, 1 (galectin 1) (LGALS1), mRNA.                                                           | DKFZp686E23103; GBP     | 0.000836784 | -3.39455 |
| ILMN_1779381 | JMJD5    | 16 | Homo sapiens jumonji domain containing 5 (JMJD5), mRNA.                                                                                     | FLJ13798                | 2.27E-08    | -3.42298 |
| ILMN_2111187 | UBQLNL   | 11 | Homo sapiens ubiquitin-like (UBQLNL), mRNA.                                                                                                 | MGC26958; MGC20470      | 0.0468338   | -3.43345 |
| ILMN_1794844 | PAPPA    | 9  | Homo sapiens pregnancy-associated plasma protein A, pappalysin 1 (PAPPA), mRNA.                                                             | DIPLA1; IGFBP-4ase; ASE | 0.00439112  | -3.43684 |
| ILMN_1767113 | NR4A2    | 2  | Homo sapiens nuclear receptor subfamily 4, group A, member 2 (NR4A2), transcript variant 1, mRNA.                                           | RNR1; NOT; TINUR; NUR   | 0.00058276  | -3.437   |
| ILMN_1775170 | DECR2    | 16 | Homo sapiens 2,4-dienoyl CoA reductase 2, peroxisomal (DECR2), mRNA.                                                                        | PDCR                    | 7.96E-05    | -3.4514  |
| ILMN_1781560 | KIAA0644 | 7  | Homo sapiens KIAA0644 gene product (KIAA0644), mRNA.                                                                                        |                         | 1.25E-05    | -3.45251 |

|              |           |    |                                                                                                                                         |                         |             |          |
|--------------|-----------|----|-----------------------------------------------------------------------------------------------------------------------------------------|-------------------------|-------------|----------|
| ILMN_1678170 | NAT2      | 8  | Homo sapiens N-acetyltransferase 2 (arylamine N-acetyltransferase) (NAT2), mRNA.                                                        | AAC2                    | 0.0347798   | -3.47938 |
| ILMN_1757036 | C21orf121 | 21 | Homo sapiens chromosome 21 open reading frame 121 (C21orf121), mRNA.                                                                    | PRED87                  | 2.07E-05    | -3.51815 |
| ILMN_1728048 | MYADM     | 19 | Homo sapiens myeloid-associated differentiation marker (MYADM), transcript variant 4, mRNA.                                             | SB135                   | 0.000369643 | -3.52455 |
| ILMN_1808674 | ARMCX2    | X  | Homo sapiens armadillo repeat containing, X-linked 2 (ARMCX2), mRNA.                                                                    | ALEX2; MGC8742; MGC1    | 0.0106903   | -3.52979 |
| ILMN_1736238 | PDIA6     | 2  | Homo sapiens protein disulfide isomerase family A, member 6 (PDIA6), mRNA.                                                              | P5; TXNDC7; ERP5        | 0.0216247   | -3.55324 |
| ILMN_2178855 | MKX       | 10 | Homo sapiens mohawk homeobox (MKX), mRNA.                                                                                               | MGC39616; IFRX; IRXL1;  | 0.00151074  | -3.59392 |
| ILMN_2193817 | NFE2L3    | 7  | Homo sapiens nuclear factor (erythroid-derived 2)-like 3 (NFE2L3), mRNA.                                                                | NRF3                    | 0.0071036   | -3.59759 |
| ILMN_1671891 | HSPA5     | 9  | Homo sapiens heat shock 70kDa protein 5 (glucose-regulated protein, 78kDa) (HSPA5), mRNA.                                               | BIP; FLJ26106; MIF2; GR | 5.14E-08    | -3.60342 |
| ILMN_2210753 | PHIP      | 6  | Homo sapiens pleckstrin homology domain interacting protein (PHIP), mRNA.                                                               | FLJ20705; FLJ45918; ndr | 8.90E-09    | -3.65413 |
| ILMN_1898518 | CASP1     | 11 | Homo sapiens caspase 1, apoptosis-related cysteine peptidase (interleukin 1, beta, convertase) (CASP1), transcript variant delta, mRNA. | IL1BC; ICE; P45         | 0.000680987 | -3.65767 |
| ILMN_1784364 | FABP4     | 8  | Homo sapiens fatty acid binding protein 4, adipocyte (FABP4), mRNA.                                                                     | A-FABP                  | 1.68E-05    | -3.66281 |

|              |           |    |                                                                                    |                          |             |          |
|--------------|-----------|----|------------------------------------------------------------------------------------|--------------------------|-------------|----------|
| ILMN_2384056 | LOC649923 |    | PREDICTED: Homo sapiens similar to Ig gamma-2 chain C region (LOC649923), mRNA.    |                          | 0.00781068  | -3.67462 |
| ILMN_1780060 | ATOH8     | 2  | Homo sapiens atonal homolog 8 (Drosophila) (ATOH8), mRNA.                          | HATH6; FLJ14708; FLJ38   | 0.00392482  | -3.71253 |
| ILMN_1809483 | GJC2      | 1  | Homo sapiens gap junction protein, gamma 2, 47kDa (GJC2), mRNA.                    | MGC105119; PMLDAR; C     | 0.0217505   | -3.71434 |
| ILMN_1692163 | CCDC51    | 3  | Homo sapiens coiled-coil domain containing 51 (CCDC51), mRNA.                      | FLJ12436                 | 0.00104376  | -3.72207 |
| ILMN_2166457 | OLFM4     | 13 | Homo sapiens olfactomedin 4 (OLFM4), mRNA.                                         | bA209J19.1; OlfD; KIAA4  | 0.0030269   | -3.73052 |
| ILMN_1758213 | SLC35F2   | 11 | Homo sapiens solute carrier family 35, member F2 (SLC35F2), mRNA.                  | HSNOV1; FLJ13018; DKF    | 0.00379624  | -3.75495 |
| ILMN_2322131 | HSD17B11  | 4  | Homo sapiens hydroxysteroid (17-beta) dehydrogenase 11 (HSD17B11), mRNA.           | 17-BETA-HSDXI; DHRS8;    | 0.00721179  | -3.75646 |
| ILMN_1661631 | TM4SF1    | 3  | Homo sapiens transmembrane 4 L six family member 1 (TM4SF1), mRNA.                 | M3S1; L6; H-L6; TAAL6    | 0.000572675 | -3.78186 |
| ILMN_1668850 | DLEU1     | 13 | Homo sapiens deleted in lymphocytic leukemia, 1 (DLEU1) on chromosome 13.          | XTP6; MGC22430; DLB1;    | 6.03E-05    | -3.86124 |
| ILMN_1783998 | NIN       | 14 | Homo sapiens ninein (GSK3B interacting protein) (NIN), transcript variant 2, mRNA. | KIAA1565                 | 6.79E-06    | -3.88273 |
| ILMN_2391861 | TMEM132A  | 11 | Homo sapiens transmembrane protein 132A (TMEM132A), transcript variant 2, mRNA.    | DKFZp547E212; HSPA5B     | 0.0474044   | -3.90635 |
| ILMN_1762735 | COLEC11   | 2  | Homo sapiens collectin sub-family member 11 (COLEC11), transcript variant 1, mRNA. | CL-K1-II; CL-K1-IIb; DKF | 0.000144661 | -3.92862 |

|              |           |    |                                                                                                                                 |                         |             |          |
|--------------|-----------|----|---------------------------------------------------------------------------------------------------------------------------------|-------------------------|-------------|----------|
| ILMN_1805228 | BCL2      | 18 | Homo sapiens B-cell CLL/lymphoma 2 (BCL2), nuclear gene encoding mitochondrial protein, transcript variant alpha, mRNA.         | Bcl-2                   | 0.000587655 | -3.96295 |
| ILMN_1823221 | CAMK1G    | 1  | Homo sapiens calcium/calmodulin-dependent protein kinase 1G (CAMK1G), mRNA.                                                     | VWS1; CLICKIII; dJ272L1 | 2.36E-05    | -3.96684 |
| ILMN_1689842 | RAB34     | 17 | Homo sapiens RAB34, member RAS oncogene family (RAB34), mRNA.                                                                   | RAH; RAB39              | 0.00232974  | -4.08962 |
| ILMN_1782958 |           |    | BX105338<br>Soares_pregnant_uterus_NbHPU<br>Homo sapiens cDNA clone IMAGp998C114347, mRNA sequence                              |                         | 4.97E-06    | -4.10371 |
| ILMN_1793504 | MTUS1     | 8  | Homo sapiens mitochondrial tumor suppressor 1 (MTUS1), nuclear gene encoding mitochondrial protein, transcript variant 5, mRNA. | MTSG1; MP44; DKFZp586   | 0.000252359 | -4.11322 |
| ILMN_2346987 | PPAP2C    | 19 | Homo sapiens phosphatidic acid phosphatase type 2C (PPAP2C), transcript variant 3, mRNA.                                        | PAP-2c; PAP2-g; LPP2    | 0.0274503   | -4.11971 |
| ILMN_1673522 | ANGPTL2   | 9  | Homo sapiens angiopoietin-like 2 (ANGPTL2), mRNA.                                                                               | ARP2; MGC8889; HARP     | 0.00386576  | -4.2391  |
| ILMN_2201580 | IL20RB    | 3  | Homo sapiens interleukin 20 receptor beta (IL20RB), mRNA.                                                                       | MGC34923; IL-20R2; FN1  | 0.0440291   | -4.2768  |
| ILMN_1795298 | LECT2     | 5  | Homo sapiens leukocyte cell-derived chemotaxin 2 (LECT2), mRNA.                                                                 | chm2; MGC126628; chm    | 0.00163191  | -4.28492 |
| ILMN_2412880 | LOC284757 | 20 | Homo sapiens hypothetical protein LOC284757 (LOC284757), mRNA.                                                                  | FLJ46426                | 0.000115282 | -4.29771 |

|              |          |    |                                                                                                               |                        |             |          |
|--------------|----------|----|---------------------------------------------------------------------------------------------------------------|------------------------|-------------|----------|
| ILMN_1663575 | KCNA6    | 12 | Homo sapiens potassium voltage-gated channel, shaker-related subfamily, member 6 (KCNA6), mRNA.               | KV1.6; HBK2            | 0.00044298  | -4.29838 |
| ILMN_1694653 | THBS2    | 6  | Homo sapiens thrombospondin 2 (THBS2), mRNA.                                                                  | TSP2                   | 0.000498078 | -4.30481 |
| ILMN_1733094 | NAMPT    | 7  | Homo sapiens nicotinamide phosphoribosyltransferase (NAMPT), mRNA.                                            | DKFZP666B131; PBEF; 1  | 0.000149112 | -4.32249 |
| ILMN_1664398 | MGC87042 | 7  | PREDICTED: Homo sapiens similar to Six transmembrane epithelial antigen of prostate (MGC87042), mRNA.         |                        | 0.0242862   | -4.33532 |
| ILMN_1700042 | TGIF1    | 18 | Homo sapiens TGFB-induced factor homeobox 1 (TGIF1), transcript variant 1, mRNA.                              | HPE4; MGC5066; MGC39   | 0.00290211  | -4.33749 |
| ILMN_1733259 | FLJ22374 | 7  | Homo sapiens hypothetical protein FLJ22374 (FLJ22374), mRNA.                                                  | MGC44277               | 0.00224384  | -4.43115 |
| ILMN_2269256 | COL4A3   | 2  | Homo sapiens collagen, type IV, alpha 3 (Goodpasture antigen) (COL4A3), transcript variant 5, mRNA.           |                        | 0.000366877 | -4.5315  |
| ILMN_1685636 | GABRP    | 5  | Homo sapiens gamma-aminobutyric acid (GABA) A receptor, pi (GABRP), mRNA.                                     | MGC126386; MGC126387   | 0.00235414  | -4.61934 |
| ILMN_2245241 | PCDH18   | 4  | Homo sapiens protocadherin 18 (PCDH18), mRNA.                                                                 | KIAA1562; DKFZP434B09  | 0.0197151   | -4.64574 |
| ILMN_1736670 | SPRY1    | 4  | Homo sapiens sprouty homolog 1, antagonist of FGF signaling (Drosophila) (SPRY1), transcript variant 2, mRNA. | hSPRY1                 | 8.94E-06    | -4.71898 |
| ILMN_1803073 | THADA    | 2  | Homo sapiens thyroid adenoma associated (THADA), transcript variant 1, mRNA.                                  | GITA; FLJ44016; KIAA17 | 9.15E-05    | -4.76072 |
| ILMN_1740402 | ARMCX1   | X  | Homo sapiens armadillo repeat containing, X-linked 1 (ARMCX1), mRNA.                                          | DKFZp686P06199; ALEX1  | 1.84E-07    | -4.83003 |

|              |         |    |                                                                                                   |                                |             |          |
|--------------|---------|----|---------------------------------------------------------------------------------------------------|--------------------------------|-------------|----------|
| ILMN_1808114 | CCRN4L  | 4  | Homo sapiens CCR4 carbon catabolite repression 4-like ( <i>S. cerevisiae</i> ) (CCRN4L), mRNA.    | CCRN4L; MGC142060; MGC142060   | 7.03E-05    | -4.90518 |
| ILMN_2311020 | CD83    | 6  | Homo sapiens CD83 molecule (CD83), transcript variant 2, mRNA.                                    | HB15; BL11                     | 0.000445347 | -5.31349 |
| ILMN_2357062 | WDR72   | 15 | Homo sapiens WD repeat domain 72 (WDR72), mRNA.                                                   | MGC126663; FLJ38736; MGC126663 | 0.0315266   | -5.3182  |
| ILMN_1764030 | SDF2L1  | 22 | Homo sapiens stromal cell-derived factor 2-like 1 (SDF2L1), mRNA.                                 |                                | 0.000158663 | -5.38473 |
| ILMN_2116877 | SDCBP2  | 20 | Homo sapiens syndecan binding protein (syntenin) 2 (SDCBP2), transcript variant 1, mRNA.          | SITAC18; FLJ12256; ST-2        | 0.0177375   | -5.78984 |
| ILMN_1671808 | TPM2    | 9  | Homo sapiens tropomyosin 2 (beta) (TPM2), transcript variant 2, mRNA.                             | AMCD1; TMSB; DA1               | 2.73E-11    | -5.80317 |
| ILMN_1748899 | FAM129B | 9  | Homo sapiens family with sequence similarity 129, member B (FAM129B), transcript variant 2, mRNA. | OC58; MEG-3; FLJ13518; MEG-3   | 0.00885225  | -5.88195 |
| ILMN_1868150 | TMEM158 | 3  | Homo sapiens transmembrane protein 158 (TMEM158), mRNA.                                           | BBP; DKFZp586E1621; R          | 0.00355357  | -5.9004  |
| ILMN_2349771 | TIAM2   | 6  | Homo sapiens T-cell lymphoma invasion and metastasis 2 (TIAM2), transcript variant 2, mRNA.       | STEF; FLJ41865                 | 0.000762072 | -5.91422 |
| ILMN_1807464 | TPM4    | 19 | Homo sapiens tropomyosin 4 (TPM4), mRNA.                                                          |                                | 0.0454445   | -5.91915 |
| ILMN_1811624 | ANKDD1A | 15 | Homo sapiens ankyrin repeat and death domain containing 1A (ANKDD1A), mRNA.                       | MGC120306; FLJ25870; MGC120306 | 0.014065    | -5.9711  |
| ILMN_1729188 | S100A13 | 1  | Homo sapiens S100 calcium binding protein A13 (S100A13), transcript variant 3, mRNA.              |                                | 0.0011206   | -6.01114 |



|              |           |    |                                                                                                                                   |                        |             |          |
|--------------|-----------|----|-----------------------------------------------------------------------------------------------------------------------------------|------------------------|-------------|----------|
| ILMN_1706635 | PLCB2     | 15 | Homo sapiens phospholipase C, beta 2 (PLCB2), mRNA.                                                                               | FLJ38135               | 0.00358464  | -6.03177 |
| ILMN_1668134 | DKFZP586H | 11 | Homo sapiens regeneration associated muscle protease (DKFZP586H2123), transcript variant 1, mRNA.                                 | RAMP; FP938            | 0.0257746   | -6.06679 |
| ILMN_1683923 | FILIP1L   | 3  | Homo sapiens filamin A interacting protein 1-like (FILIP1L), transcript variant 3, mRNA.                                          | DOC-1; GIP90; DOC1     | 0.00192261  | -6.19801 |
| ILMN_1736969 | TMEM173   | 5  | Homo sapiens transmembrane protein 173 (TMEM173), mRNA.                                                                           | FLJ38577               | 0.00110986  | -6.27523 |
| ILMN_1693262 | ABR       | 17 | Homo sapiens active BCR-related gene (ABR), transcript variant 2, mRNA.                                                           | MDB; FLJ45954          | 0.0134141   | -6.27942 |
| ILMN_1745103 | KIAA1407  | 3  | Homo sapiens KIAA1407 (KIAA1407), mRNA.                                                                                           | FLJ43314               | 0.000669593 | -6.36888 |
| ILMN_1686109 | FBLN2     | 3  | Homo sapiens fibulin 2 (FBLN2), transcript variant 2, mRNA.                                                                       |                        | 7.63E-05    | -6.46902 |
| ILMN_1876379 | NFKB2     | 10 | Homo sapiens nuclear factor of kappa light polypeptide gene enhancer in B-cells 2 (p49/p100) (NFKB2), transcript variant 2, mRNA. | LYT10; LYT-10          | 5.90E-07    | -6.53982 |
| ILMN_1762255 | SLC16A10  | 6  | Homo sapiens solute carrier family 16, member 10 (aromatic amino acid transporter) (SLC16A10), mRNA.                              | TAT1; PRO0813          | 0.0252762   | -6.69993 |
| ILMN_1715401 | LZTS1     | 8  | Homo sapiens leucine zipper, putative tumor suppressor 1 (LZTS1), mRNA.                                                           | FEZ1; F37              | 0.00036851  | -6.79051 |
| ILMN_1693941 | DPYSL3    | 5  | Homo sapiens dihydropyrimidinase-like 3 (DPYSL3), mRNA.                                                                           | DRP3; CRMP4; ULIP; DRF | 0.00185772  | -6.83195 |

|              |          |    |                                                                                                                                 |                         |             |          |
|--------------|----------|----|---------------------------------------------------------------------------------------------------------------------------------|-------------------------|-------------|----------|
| ILMN_1718766 | PCBD1    | 10 | Homo sapiens pterin-4 alpha-carbinolamine dehydratase/dimerization cofactor of hepatocyte nuclear factor 1 alpha (PCBD1), mRNA. | PHS; PCD; DCOH; PCBD    | 0.000339714 | -6.8412  |
| ILMN_1718552 | MNS1     | 15 | Homo sapiens meiosis-specific nuclear structural 1 (MNS1), mRNA.                                                                | FLJ11222                | 0.0494539   | -9.02519 |
| ILMN_2304512 | OSTalpha | 3  | Homo sapiens organic solute transporter alpha (OSTalpha), mRNA.                                                                 | MGC39807                | 2.02E-07    | -9.31449 |
| ILMN_1753347 | CAPNS1   | 19 | Homo sapiens calpain, small subunit 1 (CAPNS1), transcript variant 2, mRNA.                                                     | CANP; CALPAIN4; CDPS;   | 0.0191218   | -9.7398  |
| ILMN_1764557 | SPRY1    | 4  | Homo sapiens sprouty homolog 1, antagonist of FGF signaling (Drosophila) (SPRY1), transcript variant 1, mRNA.                   | hSPRY1                  | 0.00866466  | -10.4439 |
| ILMN_2219683 | GNMT     | 6  | Homo sapiens glycine N-methyltransferase (GNMT), mRNA.                                                                          |                         | 0.000233221 | -10.5656 |
| ILMN_1657435 | MANEA    | 6  | Homo sapiens mannosidase, endo-alpha (MANEA), mRNA.                                                                             | FLJ12838; hEndo; DKFZp  | 1.96E-08    | -15.9823 |
| ILMN_1679357 | MGST1    | 12 | Homo sapiens microsomal glutathione S-transferase 1 (MGST1), transcript variant 1c, mRNA.                                       | GST12; MGST-I; MGC145   | 0.0142824   | -17.316  |
| ILMN_1808732 | LPAR1    | 9  | Homo sapiens lysophosphatidic acid receptor 1 (LPAR1), transcript variant 2, mRNA.                                              | vzg-1; Gpcr26; Mrec1.3; | 8.21E-14    | -19.1059 |
| ILMN_1701017 | DAB2     | 5  | Homo sapiens disabled homolog 2, mitogen-responsive phosphoprotein (Drosophila) (DAB2), mRNA.                                   | FLJ26626; DOC2; DOC-2   | 6.25E-11    | -23.8836 |
| ILMN_1708183 | HPS5     | 11 | Homo sapiens Hermansky-Pudlak syndrome 5 (HPS5), transcript variant 2, mRNA.                                                    | KIAA1017; AIBP63        | 0.0404888   | -24.7939 |

|              |          |    |                                                                                                                                             |                        |             |          |
|--------------|----------|----|---------------------------------------------------------------------------------------------------------------------------------------------|------------------------|-------------|----------|
| ILMN_2124802 | CPN1     | 10 | Homo sapiens carboxypeptidase N, polypeptide 1 (CPN1), mRNA.                                                                                | CPN; SCPN; FLJ40792    | 0.000381143 | -30.5616 |
| ILMN_1787266 | DMKN     | 19 | Homo sapiens dermokine (DMKN), transcript variant 2, mRNA.                                                                                  | ZD52F10; UNQ729        | 0.0049283   | -33.4115 |
| ILMN_2102721 | S100A4   | 1  | Homo sapiens S100 calcium binding protein A4 (S100A4), transcript variant 2, mRNA.                                                          | FSP1; MTS1; 18A2; PEL9 | 0.0213645   | -35.8629 |
| ILMN_2193213 | DEFB1    | 8  | Homo sapiens defensin, beta 1 (DEFB1), mRNA.                                                                                                | DEFB-1; BD1; HBD1; DEF | 0.0194302   | -36.4604 |
| ILMN_1728262 | COL6A3   | 2  | Homo sapiens collagen, type VI, alpha 3 (COL6A3), transcript variant 1, mRNA.                                                               | DKFZp686K04147; FLJ34  | 8.23E-12    | -36.6937 |
| ILMN_1662880 | C21orf33 | 21 | Homo sapiens chromosome 21 open reading frame 33 (C21orf33), nuclear gene encoding mitochondrial protein, transcript variant 2, mRNA.       | ES1; GT335; HES1; KNP- | 1.01E-07    | -37.9713 |
| ILMN_1725661 | FRMD6    | 14 | Homo sapiens FERM domain containing 6 (FRMD6), transcript variant 2, mRNA.                                                                  | EX1; c14_5320; MGC179  | 0.0193786   | -40.8348 |
| ILMN_2165289 | HSD17B10 | X  | Homo sapiens hydroxysteroid (17-beta) dehydrogenase 10 (HSD17B10), nuclear gene encoding mitochondrial protein, transcript variant 1, mRNA. | HCD2; ABAD; ERAB; MHE  | 0.0197241   | -40.9638 |
